# Supplementary material for: Participatory approaches and open data on venomous snakes: A neglected opportunity in the global snakebite crisis?
Source: PLoS Negl Trop Dis. 2018 Mar 8;12(3):e0006162. doi: 10.1371/journal.pntd.0006162 (PMC5843214; doi:10.1371/journal.pntd.0006162)
Supplement: S2 Dataset — (XLSX) [file pntd.0006162.s004.xlsx]

## Sheet: Sheet1
VertNet records used in study
Australian Museum. Australian Museum provider for OZCAM. Record ID: a72d6ee4-2735-41df-ab38-cdea4ed4ffb9. Source: http://collections.ala.org.au/public/show/dr340 (source published on 2015-01-07)
Australian Museum. Australian Museum provider for OZCAM. Record ID: b5fdd8b7-11d2-4099-8dac-cfb88ce21b0a. Source: http://collections.ala.org.au/public/show/dr340 (source published on 2015-01-07)
Australian Museum. Australian Museum provider for OZCAM. Record ID: 6e94ef49-0b95-4d37-85ce-504a1e6707a3. Source: http://collections.ala.org.au/public/show/dr340 (source published on 2015-01-07)
Australian Museum. Australian Museum provider for OZCAM. Record ID: 3cd94d6e-8195-49ad-b3b9-ccc2ca687863. Source: http://collections.ala.org.au/public/show/dr340 (source published on 2015-01-07)
Australian Museum. Australian Museum provider for OZCAM. Record ID: 7ec77c53-3477-4b29-a8f2-8e796aa8b644. Source: http://collections.ala.org.au/public/show/dr340 (source published on 2015-01-07)
Australian Museum. Australian Museum provider for OZCAM. Record ID: 984e0291-9f21-4447-8476-58cf8623873f. Source: http://collections.ala.org.au/public/show/dr340 (source published on 2015-01-07)
Australian Museum. Australian Museum provider for OZCAM. Record ID: 5ed55067-5e5e-488b-96e5-68f609cec3fb. Source: http://collections.ala.org.au/public/show/dr340 (source published on 2015-01-07)
Australian Museum. Australian Museum provider for OZCAM. Record ID: 581d0663-4603-43ba-8b1a-80465d926aaa. Source: http://collections.ala.org.au/public/show/dr340 (source published on 2015-01-07)
Australian Museum. Australian Museum provider for OZCAM. Record ID: 69cfad7f-7df3-4f40-8c7b-fa09078c33f9. Source: http://collections.ala.org.au/public/show/dr340 (source published on 2015-01-07)
Australian Museum. Australian Museum provider for OZCAM. Record ID: 7d519179-57f3-4449-9cf2-c1765ba5b914. Source: http://collections.ala.org.au/public/show/dr340 (source published on 2015-01-07)
Australian Museum. Australian Museum provider for OZCAM. Record ID: d7bce968-6e49-4e85-8b35-b12631823701. Source: http://collections.ala.org.au/public/show/dr340 (source published on 2015-01-07)
Australian Museum. Australian Museum provider for OZCAM. Record ID: b9d95eda-1951-404d-ba47-ccea4f4271c9. Source: http://collections.ala.org.au/public/show/dr340 (source published on 2015-01-07)
Australian Museum. Australian Museum provider for OZCAM. Record ID: f4b3a173-c2b7-4fea-9c95-ac9d8af09639. Source: http://collections.ala.org.au/public/show/dr340 (source published on 2015-01-07)
Australian Museum. Australian Museum provider for OZCAM. Record ID: 520fdbd2-01e2-4035-aaed-c89e710cb4a5. Source: http://collections.ala.org.au/public/show/dr340 (source published on 2015-01-07)
Australian Museum. Australian Museum provider for OZCAM. Record ID: 59d056da-c3a4-457a-9233-b637b7d4305c. Source: http://collections.ala.org.au/public/show/dr340 (source published on 2015-01-07)
Australian Museum. Australian Museum provider for OZCAM. Record ID: 7a0b90fb-8da4-4d98-ace9-12ee452ee55c. Source: http://collections.ala.org.au/public/show/dr340 (source published on 2015-01-07)
Australian Museum. Australian Museum provider for OZCAM. Record ID: b5af8298-01f7-4375-b180-3c337aa3d4ae. Source: http://collections.ala.org.au/public/show/dr340 (source published on 2015-01-07)
Australian Museum. Australian Museum provider for OZCAM. Record ID: 25620832-7303-4512-a750-6354fee1b95c. Source: http://collections.ala.org.au/public/show/dr340 (source published on 2015-01-07)
Australian Museum. Australian Museum provider for OZCAM. Record ID: 01b97276-d314-4bb4-98bd-08e19ecc682b. Source: http://collections.ala.org.au/public/show/dr340 (source published on 2015-01-07)
Australian Museum. Australian Museum provider for OZCAM. Record ID: 5ed48508-3970-4177-95c2-f62de10617a9. Source: http://collections.ala.org.au/public/show/dr340 (source published on 2015-01-07)
Australian Museum. Australian Museum provider for OZCAM. Record ID: e49ce90f-e02b-40ed-89fb-dca3f77cd3ad. Source: http://collections.ala.org.au/public/show/dr340 (source published on 2015-01-07)
Australian Museum. Australian Museum provider for OZCAM. Record ID: 42c373d1-a3ed-4df8-b48e-94987402e395. Source: http://collections.ala.org.au/public/show/dr340 (source published on 2015-01-07)
Australian Museum. Australian Museum provider for OZCAM. Record ID: 5bd8d57d-bfa1-4f38-a2a1-c481645a1d8b. Source: http://collections.ala.org.au/public/show/dr340 (source published on 2015-01-07)
Australian Museum. Australian Museum provider for OZCAM. Record ID: 3bec7998-d2cd-42b7-b1ad-c8d583e8db0b. Source: http://collections.ala.org.au/public/show/dr340 (source published on 2015-01-07)
Australian Museum. Australian Museum provider for OZCAM. Record ID: fc7d22d7-4ff7-4240-9af6-3cd8bbdf38a1. Source: http://collections.ala.org.au/public/show/dr340 (source published on 2015-01-07)
Australian Museum. Australian Museum provider for OZCAM. Record ID: 2cae5c19-278e-4f79-9e6c-4c045b27a797. Source: http://collections.ala.org.au/public/show/dr340 (source published on 2015-01-07)
Australian Museum. Australian Museum provider for OZCAM. Record ID: ee110c37-1c33-4c31-8fb2-b69898103e5c. Source: http://collections.ala.org.au/public/show/dr340 (source published on 2015-01-07)
Australian Museum. Australian Museum provider for OZCAM. Record ID: 80cae124-4303-4e63-bdaf-ce2cfdcad313. Source: http://collections.ala.org.au/public/show/dr340 (source published on 2015-01-07)
Australian Museum. Australian Museum provider for OZCAM. Record ID: 4312f56c-659c-4c33-9735-1300e387f8e9. Source: http://collections.ala.org.au/public/show/dr340 (source published on 2015-01-07)
Australian Museum. Australian Museum provider for OZCAM. Record ID: 6ed89ef2-1ab5-4b4c-8e4c-10812044e348. Source: http://collections.ala.org.au/public/show/dr340 (source published on 2015-01-07)
Australian Museum. Australian Museum provider for OZCAM. Record ID: 9249600a-e501-4f17-a79d-c34d1d7abb31. Source: http://collections.ala.org.au/public/show/dr340 (source published on 2015-01-07)
Australian Museum. Australian Museum provider for OZCAM. Record ID: 0e846047-8628-40f6-8c3f-d2c9e2ad5873. Source: http://collections.ala.org.au/public/show/dr340 (source published on 2015-01-07)
Australian Museum. Australian Museum provider for OZCAM. Record ID: b7600c4c-dea8-4c00-a852-2639bc4eb8cb. Source: http://collections.ala.org.au/public/show/dr340 (source published on 2015-01-07)
Australian Museum. Australian Museum provider for OZCAM. Record ID: c6bb9689-f9a7-4770-a7eb-b9eaa62d63cb. Source: http://collections.ala.org.au/public/show/dr340 (source published on 2015-01-07)
Australian Museum. Australian Museum provider for OZCAM. Record ID: 11ba70c4-1248-4720-9cb7-4011ed07f5fb. Source: http://collections.ala.org.au/public/show/dr340 (source published on 2015-01-07)
Australian Museum. Australian Museum provider for OZCAM. Record ID: 5325ffc3-7769-404f-a759-390b2184d59e. Source: http://collections.ala.org.au/public/show/dr340 (source published on 2015-01-07)
Australian Museum. Australian Museum provider for OZCAM. Record ID: e5ce6bda-8a59-47e3-b052-e435e326f4d2. Source: http://collections.ala.org.au/public/show/dr340 (source published on 2015-01-07)
Australian Museum. Australian Museum provider for OZCAM. Record ID: 9d37f118-c9b4-419d-9a2a-beb1d403641b. Source: http://collections.ala.org.au/public/show/dr340 (source published on 2015-01-07)
Australian Museum. Australian Museum provider for OZCAM. Record ID: 1d8aa2d2-aba0-4dfa-aacc-415c6f7e39db. Source: http://collections.ala.org.au/public/show/dr340 (source published on 2015-01-07)
Australian Museum. Australian Museum provider for OZCAM. Record ID: b0effd8a-4862-4d4e-ad02-d2d2c19843a7. Source: http://collections.ala.org.au/public/show/dr340 (source published on 2015-01-07)
Australian Museum. Australian Museum provider for OZCAM. Record ID: 6a56423a-8efa-4275-b030-680a1f680c85. Source: http://collections.ala.org.au/public/show/dr340 (source published on 2015-01-07)
Australian Museum. Australian Museum provider for OZCAM. Record ID: eae5dffa-a221-4564-9dbd-ed5557c7d120. Source: http://collections.ala.org.au/public/show/dr340 (source published on 2015-01-07)
Australian Museum. Australian Museum provider for OZCAM. Record ID: 5daf0fe6-c0bc-4f14-b3bb-45a66152abe1. Source: http://collections.ala.org.au/public/show/dr340 (source published on 2015-01-07)
Australian Museum. Australian Museum provider for OZCAM. Record ID: 83863ef0-33c9-4ef8-b50e-8985d04571b5. Source: http://collections.ala.org.au/public/show/dr340 (source published on 2015-01-07)
Australian Museum. Australian Museum provider for OZCAM. Record ID: bbb07035-fe07-4b7e-abd6-e5ec28690b47. Source: http://collections.ala.org.au/public/show/dr340 (source published on 2015-01-07)
Australian Museum. Australian Museum provider for OZCAM. Record ID: 7fbc8297-b34b-44eb-9db4-ae9715ad8093. Source: http://collections.ala.org.au/public/show/dr340 (source published on 2015-01-07)
Australian Museum. Australian Museum provider for OZCAM. Record ID: f3cf152e-f3d1-4e90-aa08-e11df486b965. Source: http://collections.ala.org.au/public/show/dr340 (source published on 2015-01-07)
Australian Museum. Australian Museum provider for OZCAM. Record ID: 52229d3e-ca5e-4106-bc34-eb310ca7f3c2. Source: http://collections.ala.org.au/public/show/dr340 (source published on 2015-01-07)
Australian Museum. Australian Museum provider for OZCAM. Record ID: f5a4820d-554e-4200-9914-114b73b252fa. Source: http://collections.ala.org.au/public/show/dr340 (source published on 2015-01-07)
Australian Museum. Australian Museum provider for OZCAM. Record ID: 67b054b1-31c0-462c-9ed4-e0eaa8f6f568. Source: http://collections.ala.org.au/public/show/dr340 (source published on 2015-01-07)
Australian Museum. Australian Museum provider for OZCAM. Record ID: de7be43b-8027-46c9-89f2-4ce8437fadc1. Source: http://collections.ala.org.au/public/show/dr340 (source published on 2015-01-07)
Australian Museum. Australian Museum provider for OZCAM. Record ID: 0d456122-b133-44ac-b1da-3748a67142e9. Source: http://collections.ala.org.au/public/show/dr340 (source published on 2015-01-07)
Australian Museum. Australian Museum provider for OZCAM. Record ID: 44b94753-1da9-4a46-afa6-fbda1d31e2ea. Source: http://collections.ala.org.au/public/show/dr340 (source published on 2015-01-07)
Australian Museum. Australian Museum provider for OZCAM. Record ID: 0a1d2b5f-a1cc-417b-be62-c4696ebf013c. Source: http://collections.ala.org.au/public/show/dr340 (source published on 2015-01-07)
Australian Museum. Australian Museum provider for OZCAM. Record ID: ff3990b6-bbe3-4b93-933d-7797fa622463. Source: http://collections.ala.org.au/public/show/dr340 (source published on 2015-01-07)
Australian Museum. Australian Museum provider for OZCAM. Record ID: 443e9a9f-ec26-4739-b72c-2ca3ca6208b3. Source: http://collections.ala.org.au/public/show/dr340 (source published on 2015-01-07)
Australian Museum. Australian Museum provider for OZCAM. Record ID: ffa3431b-50d6-45ce-9694-e21a24bd4b27. Source: http://collections.ala.org.au/public/show/dr340 (source published on 2015-01-07)
Australian Museum. Australian Museum provider for OZCAM. Record ID: bde8a7e0-d2db-47e5-94f2-2cf529bd70ea. Source: http://collections.ala.org.au/public/show/dr340 (source published on 2015-01-07)
Australian Museum. Australian Museum provider for OZCAM. Record ID: d2f5ef01-8a52-4095-b081-e252332a01da. Source: http://collections.ala.org.au/public/show/dr340 (source published on 2015-01-07)
Australian Museum. Australian Museum provider for OZCAM. Record ID: 0ef6e931-2b5e-43d4-92c6-0c903f6a7a94. Source: http://collections.ala.org.au/public/show/dr340 (source published on 2015-01-07)
Australian Museum. Australian Museum provider for OZCAM. Record ID: 94173a02-56a7-40cb-955a-fe57344fd0dd. Source: http://collections.ala.org.au/public/show/dr340 (source published on 2015-01-07)
Australian Museum. Australian Museum provider for OZCAM. Record ID: 25fcfd37-1d8e-468f-8f4a-8c7bce751e26. Source: http://collections.ala.org.au/public/show/dr340 (source published on 2015-01-07)
Australian Museum. Australian Museum provider for OZCAM. Record ID: 65c148d0-a985-4f7d-afc0-acb4e11c6b0b. Source: http://collections.ala.org.au/public/show/dr340 (source published on 2015-01-07)
Australian Museum. Australian Museum provider for OZCAM. Record ID: 70441ee1-0696-45b0-8bab-b312b6576328. Source: http://collections.ala.org.au/public/show/dr340 (source published on 2015-01-07)
Australian Museum. Australian Museum provider for OZCAM. Record ID: 0370b8c8-0669-4603-b6d7-e2fc43fce2c2. Source: http://collections.ala.org.au/public/show/dr340 (source published on 2015-01-07)
Australian Museum. Australian Museum provider for OZCAM. Record ID: 78e3ec3e-5de6-43db-9025-a1ce7476badd. Source: http://collections.ala.org.au/public/show/dr340 (source published on 2015-01-07)
Australian Museum. Australian Museum provider for OZCAM. Record ID: cadce32a-a71a-47c7-8747-c82d854707bd. Source: http://collections.ala.org.au/public/show/dr340 (source published on 2015-01-07)
Australian Museum. Australian Museum provider for OZCAM. Record ID: 3c823e2d-bea1-4073-8887-82eaec7c1c9d. Source: http://collections.ala.org.au/public/show/dr340 (source published on 2015-01-07)
Australian Museum. Australian Museum provider for OZCAM. Record ID: 49d668ea-97db-4fe8-8933-5bf959471284. Source: http://collections.ala.org.au/public/show/dr340 (source published on 2015-01-07)
Australian Museum. Australian Museum provider for OZCAM. Record ID: da2079a7-7a56-4b9b-890b-ffac544d99be. Source: http://collections.ala.org.au/public/show/dr340 (source published on 2015-01-07)
Australian Museum. Australian Museum provider for OZCAM. Record ID: a311614e-ac94-418f-8cc4-e795a70d020e. Source: http://collections.ala.org.au/public/show/dr340 (source published on 2015-01-07)
Australian Museum. Australian Museum provider for OZCAM. Record ID: 46f49e2e-eeb8-4b92-a7b6-a88bbdb9244a. Source: http://collections.ala.org.au/public/show/dr340 (source published on 2015-01-07)
Australian Museum. Australian Museum provider for OZCAM. Record ID: da477647-c8be-4cfe-aa39-c06e43986fb8. Source: http://collections.ala.org.au/public/show/dr340 (source published on 2015-01-07)
Australian Museum. Australian Museum provider for OZCAM. Record ID: 5b5be3c6-ce64-41ca-a4d4-96c91b52dc0d. Source: http://collections.ala.org.au/public/show/dr340 (source published on 2015-01-07)
Australian Museum. Australian Museum provider for OZCAM. Record ID: a743ffc2-bc1e-4c0d-be7f-4af869f0e4d9. Source: http://collections.ala.org.au/public/show/dr340 (source published on 2015-01-07)
Australian Museum. Australian Museum provider for OZCAM. Record ID: d577d4f1-977d-44c7-a415-a9534df28956. Source: http://collections.ala.org.au/public/show/dr340 (source published on 2015-01-07)
Australian Museum. Australian Museum provider for OZCAM. Record ID: 019aa811-3eef-4af9-a02e-12f9478bb199. Source: http://collections.ala.org.au/public/show/dr340 (source published on 2015-01-07)
Australian Museum. Australian Museum provider for OZCAM. Record ID: 9c65f9c2-0b8c-4599-a4f8-63ad4981f3f6. Source: http://collections.ala.org.au/public/show/dr340 (source published on 2015-01-07)
Australian Museum. Australian Museum provider for OZCAM. Record ID: b26234a8-b383-4437-bef7-58e769e9d23e. Source: http://collections.ala.org.au/public/show/dr340 (source published on 2015-01-07)
Australian Museum. Australian Museum provider for OZCAM. Record ID: 0a274883-b44f-4205-a02a-65c37ccbdd8a. Source: http://collections.ala.org.au/public/show/dr340 (source published on 2015-01-07)
Australian Museum. Australian Museum provider for OZCAM. Record ID: 6901a802-1fef-4fb7-bfc3-e8e4be461e9d. Source: http://collections.ala.org.au/public/show/dr340 (source published on 2015-01-07)
Australian Museum. Australian Museum provider for OZCAM. Record ID: 30feb7d5-1e37-4e83-aded-0f5033b2e40a. Source: http://collections.ala.org.au/public/show/dr340 (source published on 2015-01-07)
Australian Museum. Australian Museum provider for OZCAM. Record ID: 9be09cb5-fcc7-453e-b1e1-956c6a0abdac. Source: http://collections.ala.org.au/public/show/dr340 (source published on 2015-01-07)
Australian Museum. Australian Museum provider for OZCAM. Record ID: 99d28c6f-4216-460f-b1a3-e9c116e725f2. Source: http://collections.ala.org.au/public/show/dr340 (source published on 2015-01-07)
Australian Museum. Australian Museum provider for OZCAM. Record ID: b0f1accf-f2f0-4ece-8d7a-a33b3022e1e4. Source: http://collections.ala.org.au/public/show/dr340 (source published on 2015-01-07)
Australian Museum. Australian Museum provider for OZCAM. Record ID: 308413ec-03b8-4ed7-b7da-2f0927169ea5. Source: http://collections.ala.org.au/public/show/dr340 (source published on 2015-01-07)
Australian Museum. Australian Museum provider for OZCAM. Record ID: d4ebfe90-b8dc-4355-8a2d-45f25217c59e. Source: http://collections.ala.org.au/public/show/dr340 (source published on 2015-01-07)
Australian Museum. Australian Museum provider for OZCAM. Record ID: 10b9cfab-79e7-407a-9e75-8275957fe3b3. Source: http://collections.ala.org.au/public/show/dr340 (source published on 2015-01-07)
Australian Museum. Australian Museum provider for OZCAM. Record ID: 878daad3-6a1f-4e38-a391-ed2bc16e1726. Source: http://collections.ala.org.au/public/show/dr340 (source published on 2015-01-07)
Australian Museum. Australian Museum provider for OZCAM. Record ID: ac25dc28-e900-4eec-91f1-cb84771ac4c5. Source: http://collections.ala.org.au/public/show/dr340 (source published on 2015-01-07)
Australian Museum. Australian Museum provider for OZCAM. Record ID: c9112c3c-7788-4428-a591-3f0d4160e3fb. Source: http://collections.ala.org.au/public/show/dr340 (source published on 2015-01-07)
Australian Museum. Australian Museum provider for OZCAM. Record ID: 1efa8a18-171a-489a-a9e5-43881b96bab6. Source: http://collections.ala.org.au/public/show/dr340 (source published on 2015-01-07)
Australian Museum. Australian Museum provider for OZCAM. Record ID: a7d642b9-a65d-4527-911a-6327c5bd3c41. Source: http://collections.ala.org.au/public/show/dr340 (source published on 2015-01-07)
Australian Museum. Australian Museum provider for OZCAM. Record ID: 25153f41-e739-42f9-b7aa-73d494d3e0a4. Source: http://collections.ala.org.au/public/show/dr340 (source published on 2015-01-07)
Australian Museum. Australian Museum provider for OZCAM. Record ID: 2ed254af-eaf8-4a1a-93c0-7377b9e92147. Source: http://collections.ala.org.au/public/show/dr340 (source published on 2015-01-07)
Australian Museum. Australian Museum provider for OZCAM. Record ID: 2193afd1-b9af-4c23-b1bc-22f216aac282. Source: http://collections.ala.org.au/public/show/dr340 (source published on 2015-01-07)
Australian Museum. Australian Museum provider for OZCAM. Record ID: c47f9759-49e2-4134-bef8-06245dd39bf7. Source: http://collections.ala.org.au/public/show/dr340 (source published on 2015-01-07)
Australian Museum. Australian Museum provider for OZCAM. Record ID: 9c635a8e-64f6-4d23-9a25-e72070f522aa. Source: http://collections.ala.org.au/public/show/dr340 (source published on 2015-01-07)
Australian Museum. Australian Museum provider for OZCAM. Record ID: d065bb7f-7f3e-4d65-9b30-3cc3f15dadf3. Source: http://collections.ala.org.au/public/show/dr340 (source published on 2015-01-07)
Australian Museum. Australian Museum provider for OZCAM. Record ID: 5c698cb4-75c7-45ef-ab5e-5c7eb14988ff. Source: http://collections.ala.org.au/public/show/dr340 (source published on 2015-01-07)
Australian Museum. Australian Museum provider for OZCAM. Record ID: fccbeae0-de8a-4bc8-adf3-a7b404798459. Source: http://collections.ala.org.au/public/show/dr340 (source published on 2015-01-07)
Australian Museum. Australian Museum provider for OZCAM. Record ID: e025918e-2f65-4419-825b-fda043802c84. Source: http://collections.ala.org.au/public/show/dr340 (source published on 2015-01-07)
Australian Museum. Australian Museum provider for OZCAM. Record ID: b5f7d254-2941-4d1b-9e0c-15b684d4e8c4. Source: http://collections.ala.org.au/public/show/dr340 (source published on 2015-01-07)
Australian Museum. Australian Museum provider for OZCAM. Record ID: 752dd882-09f1-40a3-804d-96712a719261. Source: http://collections.ala.org.au/public/show/dr340 (source published on 2015-01-07)
Australian Museum. Australian Museum provider for OZCAM. Record ID: 6d43cb1e-2454-4fe4-8fe2-fc63433993e1. Source: http://collections.ala.org.au/public/show/dr340 (source published on 2015-01-07)
Australian Museum. Australian Museum provider for OZCAM. Record ID: f20e0a84-bb09-4c58-8e55-d8e39708f9a3. Source: http://collections.ala.org.au/public/show/dr340 (source published on 2015-01-07)
Australian Museum. Australian Museum provider for OZCAM. Record ID: 4e5f1af4-3f40-4823-96e7-2b77ccf4bf18. Source: http://collections.ala.org.au/public/show/dr340 (source published on 2015-01-07)
Australian Museum. Australian Museum provider for OZCAM. Record ID: 4ae81497-ad68-4d93-a9c4-2a0d7a6e8ea0. Source: http://collections.ala.org.au/public/show/dr340 (source published on 2015-01-07)
Australian Museum. Australian Museum provider for OZCAM. Record ID: 93eb76a5-d11b-4f56-ae6d-84473c44b434. Source: http://collections.ala.org.au/public/show/dr340 (source published on 2015-01-07)
Australian Museum. Australian Museum provider for OZCAM. Record ID: 311fde50-f1c9-478b-8841-c56109f43243. Source: http://collections.ala.org.au/public/show/dr340 (source published on 2015-01-07)
Australian Museum. Australian Museum provider for OZCAM. Record ID: ca64ab84-0268-4bab-b755-92cec1a1a6f2. Source: http://collections.ala.org.au/public/show/dr340 (source published on 2015-01-07)
Australian Museum. Australian Museum provider for OZCAM. Record ID: 076e85d2-c499-4f88-b23c-3a5d3221e4e2. Source: http://collections.ala.org.au/public/show/dr340 (source published on 2015-01-07)
Australian Museum. Australian Museum provider for OZCAM. Record ID: 71aa3819-997d-4864-8932-ce682be6cabe. Source: http://collections.ala.org.au/public/show/dr340 (source published on 2015-01-07)
Australian Museum. Australian Museum provider for OZCAM. Record ID: ac76a22d-8581-4ae1-b850-b84179a1ec62. Source: http://collections.ala.org.au/public/show/dr340 (source published on 2015-01-07)
Australian Museum. Australian Museum provider for OZCAM. Record ID: 5afdee66-aaa1-4337-be6e-60c76b310a71. Source: http://collections.ala.org.au/public/show/dr340 (source published on 2015-01-07)
Australian Museum. Australian Museum provider for OZCAM. Record ID: 1d116716-e956-42ed-a7aa-632de50a2194. Source: http://collections.ala.org.au/public/show/dr340 (source published on 2015-01-07)
Australian Museum. Australian Museum provider for OZCAM. Record ID: c7155b54-ba41-4421-9d96-1f853c150db5. Source: http://collections.ala.org.au/public/show/dr340 (source published on 2015-01-07)
Australian Museum. Australian Museum provider for OZCAM. Record ID: 2752fab4-a5ac-4207-a63f-735ede7edccc. Source: http://collections.ala.org.au/public/show/dr340 (source published on 2015-01-07)
Australian Museum. Australian Museum provider for OZCAM. Record ID: b68bf0be-865a-40b3-b963-8fdc714cacfb. Source: http://collections.ala.org.au/public/show/dr340 (source published on 2015-01-07)
Australian Museum. Australian Museum provider for OZCAM. Record ID: 8337a611-4e0d-4bcf-8551-97bffd0ee808. Source: http://collections.ala.org.au/public/show/dr340 (source published on 2015-01-07)
Australian Museum. Australian Museum provider for OZCAM. Record ID: e5d92ca5-8158-4cfb-a636-9bfec982bd9c. Source: http://collections.ala.org.au/public/show/dr340 (source published on 2015-01-07)
Australian Museum. Australian Museum provider for OZCAM. Record ID: d4533278-6859-4bc5-bfde-370e85065863. Source: http://collections.ala.org.au/public/show/dr340 (source published on 2015-01-07)
Australian Museum. Australian Museum provider for OZCAM. Record ID: d2e10072-03ba-492b-a5ee-271cceeb8404. Source: http://collections.ala.org.au/public/show/dr340 (source published on 2015-01-07)
Australian Museum. Australian Museum provider for OZCAM. Record ID: 3101fbae-5883-4d1e-95c4-b8959f2a2441. Source: http://collections.ala.org.au/public/show/dr340 (source published on 2015-01-07)
Australian Museum. Australian Museum provider for OZCAM. Record ID: c3bfc37b-1f14-4ab5-94b7-9d6e8d3509e3. Source: http://collections.ala.org.au/public/show/dr340 (source published on 2015-01-07)
Australian Museum. Australian Museum provider for OZCAM. Record ID: 012c0188-2861-48e3-bf0e-1b257f57c352. Source: http://collections.ala.org.au/public/show/dr340 (source published on 2015-01-07)
Australian Museum. Australian Museum provider for OZCAM. Record ID: 52aceed9-d3e7-4815-8eeb-9c5e2af637ac. Source: http://collections.ala.org.au/public/show/dr340 (source published on 2015-01-07)
Australian Museum. Australian Museum provider for OZCAM. Record ID: 7545884b-72cd-41e0-9706-f6036d2496b1. Source: http://collections.ala.org.au/public/show/dr340 (source published on 2015-01-07)
Australian Museum. Australian Museum provider for OZCAM. Record ID: 4f27d28b-9cea-417a-92d7-5b6b30a33c18. Source: http://collections.ala.org.au/public/show/dr340 (source published on 2015-01-07)
Australian Museum. Australian Museum provider for OZCAM. Record ID: 1a2d7dd8-f710-4c1d-9809-f4cb6b62b6e8. Source: http://collections.ala.org.au/public/show/dr340 (source published on 2015-01-07)
Australian Museum. Australian Museum provider for OZCAM. Record ID: a7b484d8-b965-454d-bbf6-41233f749cef. Source: http://collections.ala.org.au/public/show/dr340 (source published on 2015-01-07)
Australian Museum. Australian Museum provider for OZCAM. Record ID: d5aaf984-31d0-42a0-9bb8-c9164d1b1d95. Source: http://collections.ala.org.au/public/show/dr340 (source published on 2015-01-07)
Australian Museum. Australian Museum provider for OZCAM. Record ID: 51367640-834a-44b2-9f71-eb88afa3aa84. Source: http://collections.ala.org.au/public/show/dr340 (source published on 2015-01-07)
Australian Museum. Australian Museum provider for OZCAM. Record ID: 621b588f-2081-40d9-aa12-7600d2e9c3e7. Source: http://collections.ala.org.au/public/show/dr340 (source published on 2015-01-07)
Australian Museum. Australian Museum provider for OZCAM. Record ID: 1eec3801-1e2a-4a5b-807c-8241f752f948. Source: http://collections.ala.org.au/public/show/dr340 (source published on 2015-01-07)
Australian Museum. Australian Museum provider for OZCAM. Record ID: 8df81354-00dc-4d3b-ae19-5d8e724db312. Source: http://collections.ala.org.au/public/show/dr340 (source published on 2015-01-07)
Australian Museum. Australian Museum provider for OZCAM. Record ID: 0bffa184-fc46-41d1-897c-322692322b8f. Source: http://collections.ala.org.au/public/show/dr340 (source published on 2015-01-07)
Australian Museum. Australian Museum provider for OZCAM. Record ID: 0663bb61-7d53-459e-bef5-e6c9d607567a. Source: http://collections.ala.org.au/public/show/dr340 (source published on 2015-01-07)
Australian Museum. Australian Museum provider for OZCAM. Record ID: c8744e6c-f56f-4f0c-9c10-88d5aaddaada. Source: http://collections.ala.org.au/public/show/dr340 (source published on 2015-01-07)
Australian Museum. Australian Museum provider for OZCAM. Record ID: 58203f76-a3f8-4c9c-bd6b-09469f7c7ebe. Source: http://collections.ala.org.au/public/show/dr340 (source published on 2015-01-07)
Australian Museum. Australian Museum provider for OZCAM. Record ID: fe60f982-30e8-44de-a824-41ee32ad0b6c. Source: http://collections.ala.org.au/public/show/dr340 (source published on 2015-01-07)
Australian Museum. Australian Museum provider for OZCAM. Record ID: db1b39c6-ab46-4ad6-9715-302730990cc7. Source: http://collections.ala.org.au/public/show/dr340 (source published on 2015-01-07)
Australian Museum. Australian Museum provider for OZCAM. Record ID: b2a66b43-b30b-44a3-9e37-8198fc9184a0. Source: http://collections.ala.org.au/public/show/dr340 (source published on 2015-01-07)
Australian Museum. Australian Museum provider for OZCAM. Record ID: 71e4134d-bcb2-4a74-99b7-024e1c9b966c. Source: http://collections.ala.org.au/public/show/dr340 (source published on 2015-01-07)
Australian Museum. Australian Museum provider for OZCAM. Record ID: a855a2f7-d1b5-445b-ab76-a7fbb2f80ec1. Source: http://collections.ala.org.au/public/show/dr340 (source published on 2015-01-07)
Australian Museum. Australian Museum provider for OZCAM. Record ID: 2636ba9a-4f67-4454-9756-85bdfacb0aa0. Source: http://collections.ala.org.au/public/show/dr340 (source published on 2015-01-07)
Australian Museum. Australian Museum provider for OZCAM. Record ID: 7ae200fd-e1bd-4c26-8b71-2c7a6ba55f66. Source: http://collections.ala.org.au/public/show/dr340 (source published on 2015-01-07)
Australian Museum. Australian Museum provider for OZCAM. Record ID: 47c9d165-0390-49fa-b45a-44f1f65b95c9. Source: http://collections.ala.org.au/public/show/dr340 (source published on 2015-01-07)
Australian Museum. Australian Museum provider for OZCAM. Record ID: 0ba9f91b-b1c0-4955-ae92-2b07ea500519. Source: http://collections.ala.org.au/public/show/dr340 (source published on 2015-01-07)
Australian Museum. Australian Museum provider for OZCAM. Record ID: 4477859e-f437-4d95-b7a4-eb36c00cfe91. Source: http://collections.ala.org.au/public/show/dr340 (source published on 2015-01-07)
Australian Museum. Australian Museum provider for OZCAM. Record ID: aee30974-9f65-4183-baf6-342a4f682820. Source: http://collections.ala.org.au/public/show/dr340 (source published on 2015-01-07)
Australian Museum. Australian Museum provider for OZCAM. Record ID: fb712d90-4bc4-4df7-b5e2-abb73bf12d86. Source: http://collections.ala.org.au/public/show/dr340 (source published on 2015-01-07)
Australian Museum. Australian Museum provider for OZCAM. Record ID: e9b74379-4131-4a99-a86a-613a75b330bb. Source: http://collections.ala.org.au/public/show/dr340 (source published on 2015-01-07)
Australian Museum. Australian Museum provider for OZCAM. Record ID: b09a6e58-1f77-4860-a459-b006fe92eab2. Source: http://collections.ala.org.au/public/show/dr340 (source published on 2015-01-07)
Australian Museum. Australian Museum provider for OZCAM. Record ID: b09a6e58-1f77-4860-a459-b006fe92eab2. Source: http://collections.ala.org.au/public/show/dr340 (source published on 2015-01-07)
Australian Museum. Australian Museum provider for OZCAM. Record ID: 5a6896cc-8607-43c4-9f78-ebb20f938f44. Source: http://collections.ala.org.au/public/show/dr340 (source published on 2015-01-07)
Australian Museum. Australian Museum provider for OZCAM. Record ID: 266e8219-fe4b-489b-a3b7-cd4743451991. Source: http://collections.ala.org.au/public/show/dr340 (source published on 2015-01-07)
Australian Museum. Australian Museum provider for OZCAM. Record ID: 2eaa036e-c3fc-4d98-9245-0e2dc1acc94c. Source: http://collections.ala.org.au/public/show/dr340 (source published on 2015-01-07)
Australian Museum. Australian Museum provider for OZCAM. Record ID: 9cd9abc7-58bf-439d-bb26-387b329bce03. Source: http://collections.ala.org.au/public/show/dr340 (source published on 2015-01-07)
Australian Museum. Australian Museum provider for OZCAM. Record ID: a81944b1-5ed1-47cc-9aed-c8282f4d5f17. Source: http://collections.ala.org.au/public/show/dr340 (source published on 2015-01-07)
Australian Museum. Australian Museum provider for OZCAM. Record ID: 216fa029-c2a5-4ac2-9c63-0e11af279d0c. Source: http://collections.ala.org.au/public/show/dr340 (source published on 2015-01-07)
Australian Museum. Australian Museum provider for OZCAM. Record ID: e9178b40-cf06-41e9-aac7-0e67cc642655. Source: http://collections.ala.org.au/public/show/dr340 (source published on 2015-01-07)
Australian Museum. Australian Museum provider for OZCAM. Record ID: fcc457a3-5588-4f5a-9c8f-824cba609567. Source: http://collections.ala.org.au/public/show/dr340 (source published on 2015-01-07)
Australian Museum. Australian Museum provider for OZCAM. Record ID: e5afd8de-5be0-4744-aaa9-78d7c16ff0d7. Source: http://collections.ala.org.au/public/show/dr340 (source published on 2015-01-07)
Australian Museum. Australian Museum provider for OZCAM. Record ID: 9cd4fd0c-6ba4-4775-9824-d8f972b812fc. Source: http://collections.ala.org.au/public/show/dr340 (source published on 2015-01-07)
Australian Museum. Australian Museum provider for OZCAM. Record ID: b9146d7b-4a4b-4969-ae3f-7ae27ff2c2df. Source: http://collections.ala.org.au/public/show/dr340 (source published on 2015-01-07)
Australian Museum. Australian Museum provider for OZCAM. Record ID: fc599e57-b02b-418c-9216-972aee170f74. Source: http://collections.ala.org.au/public/show/dr340 (source published on 2015-01-07)
Australian Museum. Australian Museum provider for OZCAM. Record ID: 667309dc-1417-477e-ac1a-3b13cf3cb4b6. Source: http://collections.ala.org.au/public/show/dr340 (source published on 2015-01-07)
Australian Museum. Australian Museum provider for OZCAM. Record ID: dce8a243-2e89-4127-8698-6cb72b7941df. Source: http://collections.ala.org.au/public/show/dr340 (source published on 2015-01-07)
Australian Museum. Australian Museum provider for OZCAM. Record ID: b95cfc44-9942-45f8-9fa8-1ac2329dbc5c. Source: http://collections.ala.org.au/public/show/dr340 (source published on 2015-01-07)
Australian Museum. Australian Museum provider for OZCAM. Record ID: ee9267e1-af64-4075-812c-5ae885698639. Source: http://collections.ala.org.au/public/show/dr340 (source published on 2015-01-07)
Australian Museum. Australian Museum provider for OZCAM. Record ID: f544c3c5-bb05-4d9f-b328-674631f11747. Source: http://collections.ala.org.au/public/show/dr340 (source published on 2015-01-07)
Australian Museum. Australian Museum provider for OZCAM. Record ID: c46f83e0-e92a-4147-9e70-0e4c109e9e9f. Source: http://collections.ala.org.au/public/show/dr340 (source published on 2015-01-07)
Australian Museum. Australian Museum provider for OZCAM. Record ID: 3d178b96-bcb6-491d-8fdb-ed1ed9976c5a. Source: http://collections.ala.org.au/public/show/dr340 (source published on 2015-01-07)
Australian Museum. Australian Museum provider for OZCAM. Record ID: 7d1a5f8e-baee-47b7-bd2f-c00cf23f1722. Source: http://collections.ala.org.au/public/show/dr340 (source published on 2015-01-07)
Australian Museum. Australian Museum provider for OZCAM. Record ID: ed98cd67-72a2-4f1d-a37f-0e10ed482d55. Source: http://collections.ala.org.au/public/show/dr340 (source published on 2015-01-07)
Australian Museum. Australian Museum provider for OZCAM. Record ID: 2b308aa9-4a2e-4d92-b9d5-0526446c683e. Source: http://collections.ala.org.au/public/show/dr340 (source published on 2015-01-07)
Australian Museum. Australian Museum provider for OZCAM. Record ID: 374d0d9c-ceab-420c-8f9b-588041b2a198. Source: http://collections.ala.org.au/public/show/dr340 (source published on 2015-01-07)
Australian Museum. Australian Museum provider for OZCAM. Record ID: 09265a8b-5f07-4db9-ac79-6317a6e4a0a8. Source: http://collections.ala.org.au/public/show/dr340 (source published on 2015-01-07)
Australian Museum. Australian Museum provider for OZCAM. Record ID: 57f01935-bee9-44e1-90d3-6623faaa734a. Source: http://collections.ala.org.au/public/show/dr340 (source published on 2015-01-07)
Australian Museum. Australian Museum provider for OZCAM. Record ID: 9da3a636-8c53-44db-a5e8-c30f018e1ae9. Source: http://collections.ala.org.au/public/show/dr340 (source published on 2015-01-07)
Australian Museum. Australian Museum provider for OZCAM. Record ID: e293b8a2-ed4f-44e7-aa75-fa89baa1f316. Source: http://collections.ala.org.au/public/show/dr340 (source published on 2015-01-07)
Australian Museum. Australian Museum provider for OZCAM. Record ID: 41320ab3-4520-4c1d-a398-229bbae981eb. Source: http://collections.ala.org.au/public/show/dr340 (source published on 2015-01-07)
Australian Museum. Australian Museum provider for OZCAM. Record ID: b03bf0e7-7ad9-4a74-8750-2bb04cb00fa9. Source: http://collections.ala.org.au/public/show/dr340 (source published on 2015-01-07)
Australian Museum. Australian Museum provider for OZCAM. Record ID: 1725474d-9da4-496b-8f34-612063fd7c75. Source: http://collections.ala.org.au/public/show/dr340 (source published on 2015-01-07)
Australian Museum. Australian Museum provider for OZCAM. Record ID: 6cff8e34-2058-4b23-b6ec-45e72035e4ae. Source: http://collections.ala.org.au/public/show/dr340 (source published on 2015-01-07)
Australian Museum. Australian Museum provider for OZCAM. Record ID: 89435a0c-5fab-46c8-8560-c4fefe7816b1. Source: http://collections.ala.org.au/public/show/dr340 (source published on 2015-01-07)
Australian Museum. Australian Museum provider for OZCAM. Record ID: 4e11af70-0143-4275-a6d8-c8f689f6a163. Source: http://collections.ala.org.au/public/show/dr340 (source published on 2015-01-07)
Australian Museum. Australian Museum provider for OZCAM. Record ID: a52d9355-8d43-44e7-b0f9-6581d0dd5013. Source: http://collections.ala.org.au/public/show/dr340 (source published on 2015-01-07)
Australian Museum. Australian Museum provider for OZCAM. Record ID: c0812e2f-2bcf-4c83-80c2-4ad894634395. Source: http://collections.ala.org.au/public/show/dr340 (source published on 2015-01-07)
Australian Museum. Australian Museum provider for OZCAM. Record ID: ee7655b5-8ad7-4ff4-8cf7-35d7c49c55d1. Source: http://collections.ala.org.au/public/show/dr340 (source published on 2015-01-07)
Australian Museum. Australian Museum provider for OZCAM. Record ID: fd14aa92-1462-473e-bc45-8ab2c3990a93. Source: http://collections.ala.org.au/public/show/dr340 (source published on 2015-01-07)
Australian Museum. Australian Museum provider for OZCAM. Record ID: 00f88c5c-b2e9-4403-aba9-ee5d0402d255. Source: http://collections.ala.org.au/public/show/dr340 (source published on 2015-01-07)
Australian Museum. Australian Museum provider for OZCAM. Record ID: 1735bdff-f44c-4541-9bc6-a1e84b9ff0c9. Source: http://collections.ala.org.au/public/show/dr340 (source published on 2015-01-07)
Australian Museum. Australian Museum provider for OZCAM. Record ID: 70d758d8-a67f-4258-ac8b-6c97647442f5. Source: http://collections.ala.org.au/public/show/dr340 (source published on 2015-01-07)
Australian Museum. Australian Museum provider for OZCAM. Record ID: e0b57047-3e64-47cc-9535-ab075eedc216. Source: http://collections.ala.org.au/public/show/dr340 (source published on 2015-01-07)
Australian Museum. Australian Museum provider for OZCAM. Record ID: 1825391e-a236-4b0d-8a0a-3a25eeddfb86. Source: http://collections.ala.org.au/public/show/dr340 (source published on 2015-01-07)
Australian Museum. Australian Museum provider for OZCAM. Record ID: 90173e5c-b22d-48a7-bd2c-093fd89e6ef4. Source: http://collections.ala.org.au/public/show/dr340 (source published on 2015-01-07)
Australian Museum. Australian Museum provider for OZCAM. Record ID: cc956130-5b46-456e-bdd6-365aa5993555. Source: http://collections.ala.org.au/public/show/dr340 (source published on 2015-01-07)
Australian Museum. Australian Museum provider for OZCAM. Record ID: fc599165-08d0-4a09-8d97-07dbab625090. Source: http://collections.ala.org.au/public/show/dr340 (source published on 2015-01-07)
Australian Museum. Australian Museum provider for OZCAM. Record ID: fde839b1-ee30-414c-aadf-8d07e39bfc7d. Source: http://collections.ala.org.au/public/show/dr340 (source published on 2015-01-07)
Australian Museum. Australian Museum provider for OZCAM. Record ID: a708d409-80f4-4934-9010-d94a29633a5e. Source: http://collections.ala.org.au/public/show/dr340 (source published on 2015-01-07)
Australian Museum. Australian Museum provider for OZCAM. Record ID: 13d68097-9d59-4cbe-8b54-45ee214913c1. Source: http://collections.ala.org.au/public/show/dr340 (source published on 2015-01-07)
Australian Museum. Australian Museum provider for OZCAM. Record ID: 6fe64b63-14fd-49d5-ba61-cab7e8c2997e. Source: http://collections.ala.org.au/public/show/dr340 (source published on 2015-01-07)
Australian Museum. Australian Museum provider for OZCAM. Record ID: e098c2a8-1279-49e1-b186-191eb183bdd1. Source: http://collections.ala.org.au/public/show/dr340 (source published on 2015-01-07)
Australian Museum. Australian Museum provider for OZCAM. Record ID: 391b9a27-af22-4aac-8fd0-4e8292f9b947. Source: http://collections.ala.org.au/public/show/dr340 (source published on 2015-01-07)
Australian Museum. Australian Museum provider for OZCAM. Record ID: 015c00ac-45a6-49b7-8c3f-a56503e3a947. Source: http://collections.ala.org.au/public/show/dr340 (source published on 2015-01-07)
Australian Museum. Australian Museum provider for OZCAM. Record ID: 85445f91-b2af-40e8-ba07-ba7e17d5d436. Source: http://collections.ala.org.au/public/show/dr340 (source published on 2015-01-07)
Australian Museum. Australian Museum provider for OZCAM. Record ID: 71d8baee-8a97-493d-b70a-17ae4f39899c. Source: http://collections.ala.org.au/public/show/dr340 (source published on 2015-01-07)
Australian Museum. Australian Museum provider for OZCAM. Record ID: 015b0987-9a1a-4fa1-b08f-51a654050b55. Source: http://collections.ala.org.au/public/show/dr340 (source published on 2015-01-07)
Australian Museum. Australian Museum provider for OZCAM. Record ID: dacb21df-8612-41ea-8b79-cbaa28056de4. Source: http://collections.ala.org.au/public/show/dr340 (source published on 2015-01-07)
Australian Museum. Australian Museum provider for OZCAM. Record ID: 514afe9d-2b97-41ea-8313-8c73f19713de. Source: http://collections.ala.org.au/public/show/dr340 (source published on 2015-01-07)
Australian Museum. Australian Museum provider for OZCAM. Record ID: 58cfcbc3-e9e3-442d-9736-2d7ba7115416. Source: http://collections.ala.org.au/public/show/dr340 (source published on 2015-01-07)
Australian Museum. Australian Museum provider for OZCAM. Record ID: ba1a93d9-f2a0-4ce8-8386-9b47c3953232. Source: http://collections.ala.org.au/public/show/dr340 (source published on 2015-01-07)
Australian Museum. Australian Museum provider for OZCAM. Record ID: 210d8509-dad2-4baa-b016-1fc148c5909c. Source: http://collections.ala.org.au/public/show/dr340 (source published on 2015-01-07)
Australian Museum. Australian Museum provider for OZCAM. Record ID: 44e52dc1-306e-4ff7-93ab-7abca4dc61bf. Source: http://collections.ala.org.au/public/show/dr340 (source published on 2015-01-07)
Australian Museum. Australian Museum provider for OZCAM. Record ID: 6e6d879c-c519-404a-a07e-798a825c1c4f. Source: http://collections.ala.org.au/public/show/dr340 (source published on 2015-01-07)
Australian Museum. Australian Museum provider for OZCAM. Record ID: de3e9a38-e374-489b-b879-87bbd4380e68. Source: http://collections.ala.org.au/public/show/dr340 (source published on 2015-01-07)
Australian Museum. Australian Museum provider for OZCAM. Record ID: b4823663-acbc-4b78-a8d6-02b56c5b05e4. Source: http://collections.ala.org.au/public/show/dr340 (source published on 2015-01-07)
Australian Museum. Australian Museum provider for OZCAM. Record ID: e6ff7210-1440-4f49-8dd7-2420372e6084. Source: http://collections.ala.org.au/public/show/dr340 (source published on 2015-01-07)
Australian Museum. Australian Museum provider for OZCAM. Record ID: b84be3d2-ab54-45ca-bf63-5895a8a40e8b. Source: http://collections.ala.org.au/public/show/dr340 (source published on 2015-01-07)
Australian Museum. Australian Museum provider for OZCAM. Record ID: 92909493-8441-4ea0-a4c7-6292caaa336a. Source: http://collections.ala.org.au/public/show/dr340 (source published on 2015-01-07)
Australian Museum. Australian Museum provider for OZCAM. Record ID: ba6abebf-28c4-44ba-aa05-a71d93d1b3f5. Source: http://collections.ala.org.au/public/show/dr340 (source published on 2015-01-07)
Australian Museum. Australian Museum provider for OZCAM. Record ID: 98dba529-b1e3-41c1-90a2-bd8b55465ce9. Source: http://collections.ala.org.au/public/show/dr340 (source published on 2015-01-07)
Australian Museum. Australian Museum provider for OZCAM. Record ID: 351e01c2-f898-4da7-a246-21aff2817cba. Source: http://collections.ala.org.au/public/show/dr340 (source published on 2015-01-07)
Australian Museum. Australian Museum provider for OZCAM. Record ID: 31230f29-f672-4063-99e4-a10616761e24. Source: http://collections.ala.org.au/public/show/dr340 (source published on 2015-01-07)
Australian Museum. Australian Museum provider for OZCAM. Record ID: d2386df4-b902-4c62-adcc-5caa5a0150a0. Source: http://collections.ala.org.au/public/show/dr340 (source published on 2015-01-07)
Australian Museum. Australian Museum provider for OZCAM. Record ID: 340b4126-de41-4f6d-879a-743136b934a0. Source: http://collections.ala.org.au/public/show/dr340 (source published on 2015-01-07)
Australian Museum. Australian Museum provider for OZCAM. Record ID: c0aade9f-f362-4452-b660-8dfac181c271. Source: http://collections.ala.org.au/public/show/dr340 (source published on 2015-01-07)
Australian Museum. Australian Museum provider for OZCAM. Record ID: e21295a5-f2c3-4e4d-8998-0cded3ba9ebb. Source: http://collections.ala.org.au/public/show/dr340 (source published on 2015-01-07)
Australian Museum. Australian Museum provider for OZCAM. Record ID: 013560d2-2b59-4242-97d4-f99a1f7caef1. Source: http://collections.ala.org.au/public/show/dr340 (source published on 2015-01-07)
Australian Museum. Australian Museum provider for OZCAM. Record ID: efc83ae7-7c6a-400e-8b9e-63d0aace9253. Source: http://collections.ala.org.au/public/show/dr340 (source published on 2015-01-07)
Australian Museum. Australian Museum provider for OZCAM. Record ID: 1024e859-0ab3-4b48-8aa7-90cbab21a616. Source: http://collections.ala.org.au/public/show/dr340 (source published on 2015-01-07)
Australian Museum. Australian Museum provider for OZCAM. Record ID: c735df8b-62c4-4833-95a2-dacf1db41933. Source: http://collections.ala.org.au/public/show/dr340 (source published on 2015-01-07)
Australian Museum. Australian Museum provider for OZCAM. Record ID: 6bcceba3-2496-44b9-b936-2fb4743ad224. Source: http://collections.ala.org.au/public/show/dr340 (source published on 2015-01-07)
Australian Museum. Australian Museum provider for OZCAM. Record ID: 41d47729-7289-46d8-b305-c8477dabf669. Source: http://collections.ala.org.au/public/show/dr340 (source published on 2015-01-07)
Australian Museum. Australian Museum provider for OZCAM. Record ID: e4ecd99f-11db-4797-996a-701f42940a53. Source: http://collections.ala.org.au/public/show/dr340 (source published on 2015-01-07)
Australian Museum. Australian Museum provider for OZCAM. Record ID: d7f8bf51-f8d1-4983-8ba7-7264cc670253. Source: http://collections.ala.org.au/public/show/dr340 (source published on 2015-01-07)
Australian Museum. Australian Museum provider for OZCAM. Record ID: 0cb99f6f-fd04-4acb-a784-486c401ee696. Source: http://collections.ala.org.au/public/show/dr340 (source published on 2015-01-07)
Australian Museum. Australian Museum provider for OZCAM. Record ID: 224671ee-4898-4260-9e42-83bbe67b9b93. Source: http://collections.ala.org.au/public/show/dr340 (source published on 2015-01-07)
Australian Museum. Australian Museum provider for OZCAM. Record ID: 62438b85-d0df-411e-a86e-2516b2795baf. Source: http://collections.ala.org.au/public/show/dr340 (source published on 2015-01-07)
Australian Museum. Australian Museum provider for OZCAM. Record ID: 853d8547-f6f0-4e70-8ba4-2e5963fe5431. Source: http://collections.ala.org.au/public/show/dr340 (source published on 2015-01-07)
Australian Museum. Australian Museum provider for OZCAM. Record ID: a187fb65-334d-46f1-8ee3-0e50955b3089. Source: http://collections.ala.org.au/public/show/dr340 (source published on 2015-01-07)
Australian Museum. Australian Museum provider for OZCAM. Record ID: f16bd038-d9a8-4558-8474-be88a5abc38c. Source: http://collections.ala.org.au/public/show/dr340 (source published on 2015-01-07)
Australian Museum. Australian Museum provider for OZCAM. Record ID: 593d7e92-d01b-4c21-9502-4c340342d3c0. Source: http://collections.ala.org.au/public/show/dr340 (source published on 2015-01-07)
Australian Museum. Australian Museum provider for OZCAM. Record ID: d0c86db2-db41-445a-af52-e63040d5e140. Source: http://collections.ala.org.au/public/show/dr340 (source published on 2015-01-07)
Australian Museum. Australian Museum provider for OZCAM. Record ID: b503173c-b442-467b-b841-8c27bb941907. Source: http://collections.ala.org.au/public/show/dr340 (source published on 2015-01-07)
Australian Museum. Australian Museum provider for OZCAM. Record ID: 182325de-8bf9-4b83-9968-b17694ab522c. Source: http://collections.ala.org.au/public/show/dr340 (source published on 2015-01-07)
Australian Museum. Australian Museum provider for OZCAM. Record ID: 3d443828-47b4-47a8-bc01-7d2dff64ab00. Source: http://collections.ala.org.au/public/show/dr340 (source published on 2015-01-07)
Australian Museum. Australian Museum provider for OZCAM. Record ID: 4a6132e0-5a3c-4035-a26d-4f14a9969a2d. Source: http://collections.ala.org.au/public/show/dr340 (source published on 2015-01-07)
Australian Museum. Australian Museum provider for OZCAM. Record ID: 8f0a1290-3e5b-49ca-a592-b1257da10ef8. Source: http://collections.ala.org.au/public/show/dr340 (source published on 2015-01-07)
Australian Museum. Australian Museum provider for OZCAM. Record ID: a17366aa-f355-400e-ad47-c43c27a95b80. Source: http://collections.ala.org.au/public/show/dr340 (source published on 2015-01-07)
Australian Museum. Australian Museum provider for OZCAM. Record ID: bf6807a5-fd1e-4e8c-850e-bf68e09be826. Source: http://collections.ala.org.au/public/show/dr340 (source published on 2015-01-07)
Australian Museum. Australian Museum provider for OZCAM. Record ID: 0002c3d8-f7e3-40c5-a190-7adaffea5d26. Source: http://collections.ala.org.au/public/show/dr340 (source published on 2015-01-07)
Australian Museum. Australian Museum provider for OZCAM. Record ID: 0a856575-d0d1-46c4-ab25-bfc18174daf8. Source: http://collections.ala.org.au/public/show/dr340 (source published on 2015-01-07)
Australian Museum. Australian Museum provider for OZCAM. Record ID: 1c689d15-1ef1-4337-b3d5-80b4b26b08b2. Source: http://collections.ala.org.au/public/show/dr340 (source published on 2015-01-07)
Australian Museum. Australian Museum provider for OZCAM. Record ID: 6500d495-c5d6-4044-b3a1-f354c84726da. Source: http://collections.ala.org.au/public/show/dr340 (source published on 2015-01-07)
Australian Museum. Australian Museum provider for OZCAM. Record ID: 6558e325-1ce7-4043-ba11-d3a01b0d85a7. Source: http://collections.ala.org.au/public/show/dr340 (source published on 2015-01-07)
Australian Museum. Australian Museum provider for OZCAM. Record ID: 9458bcdc-b482-4f5e-85dc-87665de60fe6. Source: http://collections.ala.org.au/public/show/dr340 (source published on 2015-01-07)
Australian Museum. Australian Museum provider for OZCAM. Record ID: 9b3334e3-55ac-47b6-bd4b-7cf34ee776d0. Source: http://collections.ala.org.au/public/show/dr340 (source published on 2015-01-07)
Australian Museum. Australian Museum provider for OZCAM. Record ID: d58cae31-009f-44b8-a5fb-297d43ae7de4. Source: http://collections.ala.org.au/public/show/dr340 (source published on 2015-01-07)
Australian Museum. Australian Museum provider for OZCAM. Record ID: 4892d930-828c-4807-a8df-b252c0f31fd5. Source: http://collections.ala.org.au/public/show/dr340 (source published on 2015-01-07)
Australian Museum. Australian Museum provider for OZCAM. Record ID: 3eb2571e-4faf-4c65-9102-d22f58515f41. Source: http://collections.ala.org.au/public/show/dr340 (source published on 2015-01-07)
Australian Museum. Australian Museum provider for OZCAM. Record ID: fd845f37-247c-48ca-9d6a-af92f4b6b2de. Source: http://collections.ala.org.au/public/show/dr340 (source published on 2015-01-07)
Australian Museum. Australian Museum provider for OZCAM. Record ID: 709bada6-92c0-4518-beba-ed7fba94b042. Source: http://collections.ala.org.au/public/show/dr340 (source published on 2015-01-07)
Australian Museum. Australian Museum provider for OZCAM. Record ID: 925c2d2e-fc68-454c-8b0c-229403332f4d. Source: http://collections.ala.org.au/public/show/dr340 (source published on 2015-01-07)
Australian Museum. Australian Museum provider for OZCAM. Record ID: ccea995e-6bad-47f7-83ae-d8a0eacd4848. Source: http://collections.ala.org.au/public/show/dr340 (source published on 2015-01-07)
Australian Museum. Australian Museum provider for OZCAM. Record ID: 9ff4dec5-60ac-4f8f-90dd-e71228a5f86d. Source: http://collections.ala.org.au/public/show/dr340 (source published on 2015-01-07)
Australian Museum. Australian Museum provider for OZCAM. Record ID: 40b1b8bc-14e1-4638-84da-3a84b6834e54. Source: http://collections.ala.org.au/public/show/dr340 (source published on 2015-01-07)
Australian Museum. Australian Museum provider for OZCAM. Record ID: cfcd39be-0b7a-4bdf-aa80-d608aaec0959. Source: http://collections.ala.org.au/public/show/dr340 (source published on 2015-01-07)
Australian Museum. Australian Museum provider for OZCAM. Record ID: d050d2c9-2694-4e2e-8f58-feb575e99ca8. Source: http://collections.ala.org.au/public/show/dr340 (source published on 2015-01-07)
Australian Museum. Australian Museum provider for OZCAM. Record ID: 093e0d63-5350-49f3-99eb-44a815dd6904. Source: http://collections.ala.org.au/public/show/dr340 (source published on 2015-01-07)
Australian Museum. Australian Museum provider for OZCAM. Record ID: 811d701f-b021-4646-b936-d410cc9c9991. Source: http://collections.ala.org.au/public/show/dr340 (source published on 2015-01-07)
Australian Museum. Australian Museum provider for OZCAM. Record ID: eb25410e-df43-4ec6-b145-38c821baf7c4. Source: http://collections.ala.org.au/public/show/dr340 (source published on 2015-01-07)
Australian Museum. Australian Museum provider for OZCAM. Record ID: bd2f8776-3868-44c1-8a5b-a567dda723a4. Source: http://collections.ala.org.au/public/show/dr340 (source published on 2015-01-07)
Australian Museum. Australian Museum provider for OZCAM. Record ID: fc04e059-fe14-4dd2-a51b-4273f5f41bc2. Source: http://collections.ala.org.au/public/show/dr340 (source published on 2015-01-07)
Australian Museum. Australian Museum provider for OZCAM. Record ID: 25970f90-4dd1-4c50-896d-d015e17a99f7. Source: http://collections.ala.org.au/public/show/dr340 (source published on 2015-01-07)
Australian Museum. Australian Museum provider for OZCAM. Record ID: e14e8d20-3773-49af-adff-8342de65d807. Source: http://collections.ala.org.au/public/show/dr340 (source published on 2015-01-07)
Australian Museum. Australian Museum provider for OZCAM. Record ID: 668f9db6-1c65-4dad-b53a-52b3daf18464. Source: http://collections.ala.org.au/public/show/dr340 (source published on 2015-01-07)
Australian Museum. Australian Museum provider for OZCAM. Record ID: d8c5c34f-1838-4f7a-9663-962a344d0c21. Source: http://collections.ala.org.au/public/show/dr340 (source published on 2015-01-07)
Australian Museum. Australian Museum provider for OZCAM. Record ID: 796af247-5246-4150-b7a9-8bdbdcf19e06. Source: http://collections.ala.org.au/public/show/dr340 (source published on 2015-01-07)
Australian Museum. Australian Museum provider for OZCAM. Record ID: e599a0cf-3fdb-4124-b7d3-f26b48d4747f. Source: http://collections.ala.org.au/public/show/dr340 (source published on 2015-01-07)
Australian Museum. Australian Museum provider for OZCAM. Record ID: 1c72d557-2635-452b-a14d-720f79a89ef1. Source: http://collections.ala.org.au/public/show/dr340 (source published on 2015-01-07)
Australian Museum. Australian Museum provider for OZCAM. Record ID: 9c15a930-8833-4815-bec8-aefe3f0a4f20. Source: http://collections.ala.org.au/public/show/dr340 (source published on 2015-01-07)
Australian Museum. Australian Museum provider for OZCAM. Record ID: b8f08a68-6dfd-4ed4-833c-822eb5c7ea2f. Source: http://collections.ala.org.au/public/show/dr340 (source published on 2015-01-07)
Australian Museum. Australian Museum provider for OZCAM. Record ID: 87d028b9-94dc-45f1-aac0-c5b0b416670c. Source: http://collections.ala.org.au/public/show/dr340 (source published on 2015-01-07)
Australian Museum. Australian Museum provider for OZCAM. Record ID: def721b8-09e4-4f7d-960f-9b3c942cc1c7. Source: http://collections.ala.org.au/public/show/dr340 (source published on 2015-01-07)
Australian Museum. Australian Museum provider for OZCAM. Record ID: 20ebbce0-13c6-49cf-87e1-8d1dfb0d073f. Source: http://collections.ala.org.au/public/show/dr340 (source published on 2015-01-07)
Australian Museum. Australian Museum provider for OZCAM. Record ID: 67c54c92-49da-4889-ab57-1610ec6cc6fb. Source: http://collections.ala.org.au/public/show/dr340 (source published on 2015-01-07)
Australian Museum. Australian Museum provider for OZCAM. Record ID: d4b3eac9-6a47-4dfa-aa34-4062efd8d2ac. Source: http://collections.ala.org.au/public/show/dr340 (source published on 2015-01-07)
Australian Museum. Australian Museum provider for OZCAM. Record ID: d5aa0131-2b64-4f65-ab26-41752e2d655a. Source: http://collections.ala.org.au/public/show/dr340 (source published on 2015-01-07)
Australian Museum. Australian Museum provider for OZCAM. Record ID: cc496804-e72b-479f-9b80-e06d856b5a00. Source: http://collections.ala.org.au/public/show/dr340 (source published on 2015-01-07)
Australian Museum. Australian Museum provider for OZCAM. Record ID: 756e7fe9-8935-4307-b74c-19cd016433c0. Source: http://collections.ala.org.au/public/show/dr340 (source published on 2015-01-07)
Australian Museum. Australian Museum provider for OZCAM. Record ID: cf9cf115-446c-4199-904e-9707569afd16. Source: http://collections.ala.org.au/public/show/dr340 (source published on 2015-01-07)
Australian Museum. Australian Museum provider for OZCAM. Record ID: 176a83b3-1fc2-420c-a62a-4d105a80180c. Source: http://collections.ala.org.au/public/show/dr340 (source published on 2015-01-07)
Australian Museum. Australian Museum provider for OZCAM. Record ID: c706d923-c885-4906-8eb7-ec48a5963b97. Source: http://collections.ala.org.au/public/show/dr340 (source published on 2015-01-07)
Australian Museum. Australian Museum provider for OZCAM. Record ID: a0b44055-ade6-4a5e-9255-fe5b36257947. Source: http://collections.ala.org.au/public/show/dr340 (source published on 2015-01-07)
Australian Museum. Australian Museum provider for OZCAM. Record ID: 4061f5d4-86de-4ece-a27e-d023dba42067. Source: http://collections.ala.org.au/public/show/dr340 (source published on 2015-01-07)
Australian Museum. Australian Museum provider for OZCAM. Record ID: 599f2b4d-9bc9-4b1f-a86f-995ed26e71bd. Source: http://collections.ala.org.au/public/show/dr340 (source published on 2015-01-07)
Australian Museum. Australian Museum provider for OZCAM. Record ID: 06d2317f-baf1-436b-aa5e-88f5a162d028. Source: http://collections.ala.org.au/public/show/dr340 (source published on 2015-01-07)
Australian Museum. Australian Museum provider for OZCAM. Record ID: 6415b5b5-2fd7-4a5a-a35e-b28c1f8e20e3. Source: http://collections.ala.org.au/public/show/dr340 (source published on 2015-01-07)
Australian Museum. Australian Museum provider for OZCAM. Record ID: d14b3906-95e1-4e59-bb42-acf7f937bd3b. Source: http://collections.ala.org.au/public/show/dr340 (source published on 2015-01-07)
Australian Museum. Australian Museum provider for OZCAM. Record ID: bc16cb5f-0d7e-4cca-a5e0-ef077393c95e. Source: http://collections.ala.org.au/public/show/dr340 (source published on 2015-01-07)
Australian Museum. Australian Museum provider for OZCAM. Record ID: 7d10638f-071b-4712-b35e-cbbaed73d4bf. Source: http://collections.ala.org.au/public/show/dr340 (source published on 2015-01-07)
Australian Museum. Australian Museum provider for OZCAM. Record ID: 17d06660-74ca-4e09-b2e7-110ac5aa8db4. Source: http://collections.ala.org.au/public/show/dr340 (source published on 2015-01-07)
Australian Museum. Australian Museum provider for OZCAM. Record ID: 98974437-7447-4167-b9a0-ce7fac634976. Source: http://collections.ala.org.au/public/show/dr340 (source published on 2015-01-07)
Australian Museum. Australian Museum provider for OZCAM. Record ID: da97cc28-8037-4111-88da-bd9b7978d220. Source: http://collections.ala.org.au/public/show/dr340 (source published on 2015-01-07)
Australian Museum. Australian Museum provider for OZCAM. Record ID: 5aa1b31f-845c-4fde-bad8-3f16d7e411bb. Source: http://collections.ala.org.au/public/show/dr340 (source published on 2015-01-07)
Australian Museum. Australian Museum provider for OZCAM. Record ID: d8592ec2-5392-4694-85d1-f4c7bd850788. Source: http://collections.ala.org.au/public/show/dr340 (source published on 2015-01-07)
Australian Museum. Australian Museum provider for OZCAM. Record ID: 88ba2213-886b-4013-9571-7b5d2648d549. Source: http://collections.ala.org.au/public/show/dr340 (source published on 2015-01-07)
Australian Museum. Australian Museum provider for OZCAM. Record ID: 86793df3-7950-4b33-aed3-6891e4a610f1. Source: http://collections.ala.org.au/public/show/dr340 (source published on 2015-01-07)
Australian Museum. Australian Museum provider for OZCAM. Record ID: 5def9ab5-b131-45c9-9b6e-e913aa5f8910. Source: http://collections.ala.org.au/public/show/dr340 (source published on 2015-01-07)
Australian Museum. Australian Museum provider for OZCAM. Record ID: c98ebc28-88ac-405d-b6c7-a9591c665ffd. Source: http://collections.ala.org.au/public/show/dr340 (source published on 2015-01-07)
Australian Museum. Australian Museum provider for OZCAM. Record ID: 46db43f6-1663-4035-8a41-cd37e5e68ac8. Source: http://collections.ala.org.au/public/show/dr340 (source published on 2015-01-07)
Australian Museum. Australian Museum provider for OZCAM. Record ID: 7056ceda-79f3-4ffa-811e-7ce9233019d0. Source: http://collections.ala.org.au/public/show/dr340 (source published on 2015-01-07)
Australian Museum. Australian Museum provider for OZCAM. Record ID: 0b327e95-e3a1-469e-897b-580b06c2e5f5. Source: http://collections.ala.org.au/public/show/dr340 (source published on 2015-01-07)
Australian Museum. Australian Museum provider for OZCAM. Record ID: f7a8ce7a-8d89-4e45-836c-d7548292c5b7. Source: http://collections.ala.org.au/public/show/dr340 (source published on 2015-01-07)
Australian Museum. Australian Museum provider for OZCAM. Record ID: 1efa36df-1c10-426c-86c4-45ea5f40d14e. Source: http://collections.ala.org.au/public/show/dr340 (source published on 2015-01-07)
Australian Museum. Australian Museum provider for OZCAM. Record ID: 02d041df-c484-47a2-a235-f6c08c6c01a9. Source: http://collections.ala.org.au/public/show/dr340 (source published on 2015-01-07)
Australian Museum. Australian Museum provider for OZCAM. Record ID: 75d4135a-1388-4758-bec5-696031b78161. Source: http://collections.ala.org.au/public/show/dr340 (source published on 2015-01-07)
Australian Museum. Australian Museum provider for OZCAM. Record ID: 27a7bf1e-f076-46a7-8613-6a5946bcd733. Source: http://collections.ala.org.au/public/show/dr340 (source published on 2015-01-07)
Australian Museum. Australian Museum provider for OZCAM. Record ID: e8f28888-91db-4677-a897-e2d90f6edbca. Source: http://collections.ala.org.au/public/show/dr340 (source published on 2015-01-07)
Australian Museum. Australian Museum provider for OZCAM. Record ID: 78c1b9eb-8d6c-46a0-8f48-5565f4dadfdc. Source: http://collections.ala.org.au/public/show/dr340 (source published on 2015-01-07)
Australian Museum. Australian Museum provider for OZCAM. Record ID: 3065cb2a-7b74-4360-a79a-11b6bce7ca0f. Source: http://collections.ala.org.au/public/show/dr340 (source published on 2015-01-07)
Australian Museum. Australian Museum provider for OZCAM. Record ID: 46f8ded9-9ceb-4804-b419-1b45b3fbcdb0. Source: http://collections.ala.org.au/public/show/dr340 (source published on 2015-01-07)
Australian Museum. Australian Museum provider for OZCAM. Record ID: 1fb216f6-a3a1-407f-b10e-6d6a5408872a. Source: http://collections.ala.org.au/public/show/dr340 (source published on 2015-01-07)
Australian Museum. Australian Museum provider for OZCAM. Record ID: 2729c3ad-eb0a-4551-88ec-ad3cb8ad5c05. Source: http://collections.ala.org.au/public/show/dr340 (source published on 2015-01-07)
Australian Museum. Australian Museum provider for OZCAM. Record ID: 05444f28-9fa2-4645-a1b7-6d72450dbf7f. Source: http://collections.ala.org.au/public/show/dr340 (source published on 2015-01-07)
Australian Museum. Australian Museum provider for OZCAM. Record ID: 541cd9fc-a0b5-4c9f-88eb-d3f7645ad2eb. Source: http://collections.ala.org.au/public/show/dr340 (source published on 2015-01-07)
Australian Museum. Australian Museum provider for OZCAM. Record ID: 95e306f8-bb32-4f6d-8c2a-2192c48236b7. Source: http://collections.ala.org.au/public/show/dr340 (source published on 2015-01-07)
Australian Museum. Australian Museum provider for OZCAM. Record ID: 40db495d-7365-42cc-b9ca-ab3daf9d72d0. Source: http://collections.ala.org.au/public/show/dr340 (source published on 2015-01-07)
Australian Museum. Australian Museum provider for OZCAM. Record ID: 331f20ed-5156-4e6e-9f91-4bd8ac623e64. Source: http://collections.ala.org.au/public/show/dr340 (source published on 2015-01-07)
Australian Museum. Australian Museum provider for OZCAM. Record ID: 81926bce-8ca3-4d9b-ad32-61cd82c3b7af. Source: http://collections.ala.org.au/public/show/dr340 (source published on 2015-01-07)
Australian Museum. Australian Museum provider for OZCAM. Record ID: a998d8b3-0166-4577-9124-8942fb681ecb. Source: http://collections.ala.org.au/public/show/dr340 (source published on 2015-01-07)
Australian Museum. Australian Museum provider for OZCAM. Record ID: 312894ce-505e-40ec-b29c-3b3f6cde9147. Source: http://collections.ala.org.au/public/show/dr340 (source published on 2015-01-07)
Australian Museum. Australian Museum provider for OZCAM. Record ID: 64652134-bdbf-4bee-9533-c4289264a5f3. Source: http://collections.ala.org.au/public/show/dr340 (source published on 2015-01-07)
Australian Museum. Australian Museum provider for OZCAM. Record ID: 18538b89-2802-4821-8380-81cac1601812. Source: http://collections.ala.org.au/public/show/dr340 (source published on 2015-01-07)
Australian Museum. Australian Museum provider for OZCAM. Record ID: 32d49139-c8af-44d4-b2a3-f32e325176eb. Source: http://collections.ala.org.au/public/show/dr340 (source published on 2015-01-07)
Australian Museum. Australian Museum provider for OZCAM. Record ID: ebfb2de1-42dd-40c3-8bf1-d740ef27166f. Source: http://collections.ala.org.au/public/show/dr340 (source published on 2015-01-07)
Australian Museum. Australian Museum provider for OZCAM. Record ID: 2ef6fbc2-2596-449c-a15a-dcc4d095ee85. Source: http://collections.ala.org.au/public/show/dr340 (source published on 2015-01-07)
Australian Museum. Australian Museum provider for OZCAM. Record ID: 1f28feef-a757-4080-b6de-8a360c380d8e. Source: http://collections.ala.org.au/public/show/dr340 (source published on 2015-01-07)
Australian Museum. Australian Museum provider for OZCAM. Record ID: 7d0188f7-9723-43ab-8e10-bdd935df2be5. Source: http://collections.ala.org.au/public/show/dr340 (source published on 2015-01-07)
Australian Museum. Australian Museum provider for OZCAM. Record ID: 70a37c8a-e49d-40f5-ada0-897b7eae0447. Source: http://collections.ala.org.au/public/show/dr340 (source published on 2015-01-07)
Australian Museum. Australian Museum provider for OZCAM. Record ID: ffa9ceca-f805-4c70-9752-7d74454fbd99. Source: http://collections.ala.org.au/public/show/dr340 (source published on 2015-01-07)
Australian Museum. Australian Museum provider for OZCAM. Record ID: 15687aaf-f4f6-4215-9b79-4a0436426350. Source: http://collections.ala.org.au/public/show/dr340 (source published on 2015-01-07)
Australian Museum. Australian Museum provider for OZCAM. Record ID: 6f4574b1-6706-4c6c-822b-f12584c1bfbe. Source: http://collections.ala.org.au/public/show/dr340 (source published on 2015-01-07)
Australian Museum. Australian Museum provider for OZCAM. Record ID: 243284c0-5a76-49a1-b9c3-016250d00a2a. Source: http://collections.ala.org.au/public/show/dr340 (source published on 2015-01-07)
Australian Museum. Australian Museum provider for OZCAM. Record ID: cdc15b2e-7003-47a1-8c4a-38fcfb6ea225. Source: http://collections.ala.org.au/public/show/dr340 (source published on 2015-01-07)
Australian Museum. Australian Museum provider for OZCAM. Record ID: f9be4913-7284-48c5-9263-8648efdca7bb. Source: http://collections.ala.org.au/public/show/dr340 (source published on 2015-01-07)
Australian Museum. Australian Museum provider for OZCAM. Record ID: 1e5b92c8-0213-4c04-a3c5-89611b309cff. Source: http://collections.ala.org.au/public/show/dr340 (source published on 2015-01-07)
Australian Museum. Australian Museum provider for OZCAM. Record ID: 90ca5040-6862-4679-86be-eb64bdf8dac3. Source: http://collections.ala.org.au/public/show/dr340 (source published on 2015-01-07)
Australian Museum. Australian Museum provider for OZCAM. Record ID: 601b8be1-8b2a-472e-8e5b-e1a05cc44505. Source: http://collections.ala.org.au/public/show/dr340 (source published on 2015-01-07)
Australian Museum. Australian Museum provider for OZCAM. Record ID: 47d2f8aa-8da3-4f96-8082-b10f0df66b91. Source: http://collections.ala.org.au/public/show/dr340 (source published on 2015-01-07)
Australian Museum. Australian Museum provider for OZCAM. Record ID: 416e1802-02a6-442c-92a5-83d629a56b22. Source: http://collections.ala.org.au/public/show/dr340 (source published on 2015-01-07)
Australian Museum. Australian Museum provider for OZCAM. Record ID: bbc082a3-fde2-4d44-8432-7d7ed3b0c329. Source: http://collections.ala.org.au/public/show/dr340 (source published on 2015-01-07)
Australian Museum. Australian Museum provider for OZCAM. Record ID: 3b5d99f1-5cda-4c7c-93a3-c19a9aaff10f. Source: http://collections.ala.org.au/public/show/dr340 (source published on 2015-01-07)
Australian Museum. Australian Museum provider for OZCAM. Record ID: 70db935b-b1e8-4c1f-9b8a-823435834006. Source: http://collections.ala.org.au/public/show/dr340 (source published on 2015-01-07)
Australian Museum. Australian Museum provider for OZCAM. Record ID: ae84f528-85e6-4021-9066-cf291a85739c. Source: http://collections.ala.org.au/public/show/dr340 (source published on 2015-01-07)
Australian Museum. Australian Museum provider for OZCAM. Record ID: 662ce61f-24a7-4f7d-961c-a3bf2fdd4a4b. Source: http://collections.ala.org.au/public/show/dr340 (source published on 2015-01-07)
Australian Museum. Australian Museum provider for OZCAM. Record ID: c7cbd7bf-36c6-4cf3-a26a-7966f6944db3. Source: http://collections.ala.org.au/public/show/dr340 (source published on 2015-01-07)
Australian Museum. Australian Museum provider for OZCAM. Record ID: 94cf46e3-ba58-475a-8d38-da9906575b9f. Source: http://collections.ala.org.au/public/show/dr340 (source published on 2015-01-07)
Australian Museum. Australian Museum provider for OZCAM. Record ID: f5596dad-15c9-41ec-ac28-e16b0f390b26. Source: http://collections.ala.org.au/public/show/dr340 (source published on 2015-01-07)
Australian Museum. Australian Museum provider for OZCAM. Record ID: 251c3e8d-b9af-4ac8-bb2d-a6ba1cb2e069. Source: http://collections.ala.org.au/public/show/dr340 (source published on 2015-01-07)
Australian Museum. Australian Museum provider for OZCAM. Record ID: ac1db431-f782-427c-981e-dd6d3d2b1089. Source: http://collections.ala.org.au/public/show/dr340 (source published on 2015-01-07)
Australian Museum. Australian Museum provider for OZCAM. Record ID: 1dc5a0f4-e453-4fa6-95a4-be2a1356ab26. Source: http://collections.ala.org.au/public/show/dr340 (source published on 2015-01-07)
Australian Museum. Australian Museum provider for OZCAM. Record ID: c1dfee45-9999-40a1-a83e-74b99147cfa4. Source: http://collections.ala.org.au/public/show/dr340 (source published on 2015-01-07)
Australian Museum. Australian Museum provider for OZCAM. Record ID: a9a1d5d4-192d-4b67-a48a-b432dbbaa4ef. Source: http://collections.ala.org.au/public/show/dr340 (source published on 2015-01-07)
Australian Museum. Australian Museum provider for OZCAM. Record ID: 9f9bb894-7219-4dd6-8fa2-52bf3cf10137. Source: http://collections.ala.org.au/public/show/dr340 (source published on 2015-01-07)
Australian Museum. Australian Museum provider for OZCAM. Record ID: 310c36bd-72c2-4d22-94f4-3f0f242ca34f. Source: http://collections.ala.org.au/public/show/dr340 (source published on 2015-01-07)
Australian Museum. Australian Museum provider for OZCAM. Record ID: f17a1de1-86c8-4a0a-8027-eb24a5efdef8. Source: http://collections.ala.org.au/public/show/dr340 (source published on 2015-01-07)
Australian Museum. Australian Museum provider for OZCAM. Record ID: cfe61f05-2aec-4ecf-ad1b-96e74ed805fb. Source: http://collections.ala.org.au/public/show/dr340 (source published on 2015-01-07)
Australian Museum. Australian Museum provider for OZCAM. Record ID: 9b7f22eb-362e-4fe5-8756-48e8cb866577. Source: http://collections.ala.org.au/public/show/dr340 (source published on 2015-01-07)
Australian Museum. Australian Museum provider for OZCAM. Record ID: 7311c696-818e-463e-a8d8-5f64d14ad30c. Source: http://collections.ala.org.au/public/show/dr340 (source published on 2015-01-07)
Australian Museum. Australian Museum provider for OZCAM. Record ID: 19904e4f-8c62-4778-956b-a4e721699288. Source: http://collections.ala.org.au/public/show/dr340 (source published on 2015-01-07)
Australian Museum. Australian Museum provider for OZCAM. Record ID: 5afac9c9-0871-45d0-a3bf-72144795110e. Source: http://collections.ala.org.au/public/show/dr340 (source published on 2015-01-07)
Australian Museum. Australian Museum provider for OZCAM. Record ID: 3c72a66a-cae6-4df0-8b92-20376a87511e. Source: http://collections.ala.org.au/public/show/dr340 (source published on 2015-01-07)
Australian Museum. Australian Museum provider for OZCAM. Record ID: d72fad6a-1428-461b-85c9-3df74bc10742. Source: http://collections.ala.org.au/public/show/dr340 (source published on 2015-01-07)
Australian Museum. Australian Museum provider for OZCAM. Record ID: 58d6bc35-955a-4896-a2fe-2dbeff41cfa8. Source: http://collections.ala.org.au/public/show/dr340 (source published on 2015-01-07)
Australian Museum. Australian Museum provider for OZCAM. Record ID: 13e6fab2-cff7-4b16-b443-1ac8adb4d3d0. Source: http://collections.ala.org.au/public/show/dr340 (source published on 2015-01-07)
Australian Museum. Australian Museum provider for OZCAM. Record ID: 16e86698-53b2-46ba-8436-e3480640ff9a. Source: http://collections.ala.org.au/public/show/dr340 (source published on 2015-01-07)
Australian Museum. Australian Museum provider for OZCAM. Record ID: dcee9541-82cc-4c20-af30-0db8a1ddf41c. Source: http://collections.ala.org.au/public/show/dr340 (source published on 2015-01-07)
Australian Museum. Australian Museum provider for OZCAM. Record ID: edc2072c-fab5-428a-97ab-e8332a39c926. Source: http://collections.ala.org.au/public/show/dr340 (source published on 2015-01-07)
Australian Museum. Australian Museum provider for OZCAM. Record ID: f80f4bc9-989c-43b1-ac97-e234980678c1. Source: http://collections.ala.org.au/public/show/dr340 (source published on 2015-01-07)
Australian Museum. Australian Museum provider for OZCAM. Record ID: 8ded4336-f598-4f21-afe4-735b97967e9f. Source: http://collections.ala.org.au/public/show/dr340 (source published on 2015-01-07)
Australian Museum. Australian Museum provider for OZCAM. Record ID: 5d774587-124f-47a7-9134-47560f3baff8. Source: http://collections.ala.org.au/public/show/dr340 (source published on 2015-01-07)
Australian Museum. Australian Museum provider for OZCAM. Record ID: d1491a12-5b2b-4f58-b4ea-c285e96c09fa. Source: http://collections.ala.org.au/public/show/dr340 (source published on 2015-01-07)
Australian Museum. Australian Museum provider for OZCAM. Record ID: d133a4f6-e1be-46c8-bd19-711e20ee6e8f. Source: http://collections.ala.org.au/public/show/dr340 (source published on 2015-01-07)
Australian Museum. Australian Museum provider for OZCAM. Record ID: 3af81f4b-0160-4f0c-a1e0-dd48710c8a3f. Source: http://collections.ala.org.au/public/show/dr340 (source published on 2015-01-07)
Australian Museum. Australian Museum provider for OZCAM. Record ID: 20d90da2-02b9-4380-ab63-508eb668651b. Source: http://collections.ala.org.au/public/show/dr340 (source published on 2015-01-07)
Australian Museum. Australian Museum provider for OZCAM. Record ID: 872e06dd-e7b7-4956-9cdc-baa30dc98e08. Source: http://collections.ala.org.au/public/show/dr340 (source published on 2015-01-07)
Australian Museum. Australian Museum provider for OZCAM. Record ID: 45893f9e-c1a7-4ccb-8717-7f26422dedf1. Source: http://collections.ala.org.au/public/show/dr340 (source published on 2015-01-07)
Australian Museum. Australian Museum provider for OZCAM. Record ID: d2446ee4-3828-40a4-8074-1dd2b273fa1f. Source: http://collections.ala.org.au/public/show/dr340 (source published on 2015-01-07)
Australian Museum. Australian Museum provider for OZCAM. Record ID: 6da0d116-208d-4728-a81b-a256a02e7f53. Source: http://collections.ala.org.au/public/show/dr340 (source published on 2015-01-07)
Australian Museum. Australian Museum provider for OZCAM. Record ID: 2ee51243-ffaf-48fb-9107-32844665b644. Source: http://collections.ala.org.au/public/show/dr340 (source published on 2015-01-07)
Australian Museum. Australian Museum provider for OZCAM. Record ID: f4618e92-28f6-42b6-a07d-2fe5db570b19. Source: http://collections.ala.org.au/public/show/dr340 (source published on 2015-01-07)
Australian Museum. Australian Museum provider for OZCAM. Record ID: 6c8a5b7d-e03a-44f9-9433-7f912ed4e160. Source: http://collections.ala.org.au/public/show/dr340 (source published on 2015-01-07)
Australian Museum. Australian Museum provider for OZCAM. Record ID: 4b84e17d-3bbd-4749-9dd3-067efc53c4a4. Source: http://collections.ala.org.au/public/show/dr340 (source published on 2015-01-07)
Australian Museum. Australian Museum provider for OZCAM. Record ID: acc6fd7b-379d-4141-a305-8bd33b6a8fe7. Source: http://collections.ala.org.au/public/show/dr340 (source published on 2015-01-07)
Australian Museum. Australian Museum provider for OZCAM. Record ID: ba4f3c8e-0589-4df2-a94a-193fe7ca8ccb. Source: http://collections.ala.org.au/public/show/dr340 (source published on 2015-01-07)
Australian Museum. Australian Museum provider for OZCAM. Record ID: 7a91cfac-1eb7-4e2c-a276-d9fea44ef387. Source: http://collections.ala.org.au/public/show/dr340 (source published on 2015-01-07)
Australian Museum. Australian Museum provider for OZCAM. Record ID: 7c064d4b-f50d-4b57-beb2-f374052b023a. Source: http://collections.ala.org.au/public/show/dr340 (source published on 2015-01-07)
Australian Museum. Australian Museum provider for OZCAM. Record ID: facc6335-5b2b-4885-82f8-a1ce22127116. Source: http://collections.ala.org.au/public/show/dr340 (source published on 2015-01-07)
Australian Museum. Australian Museum provider for OZCAM. Record ID: faa5dfd9-3f89-461f-b36e-795013752808. Source: http://collections.ala.org.au/public/show/dr340 (source published on 2015-01-07)
Australian Museum. Australian Museum provider for OZCAM. Record ID: 0504a844-99a7-4148-9547-54979787a0e3. Source: http://collections.ala.org.au/public/show/dr340 (source published on 2015-01-07)
Australian Museum. Australian Museum provider for OZCAM. Record ID: edfd5f67-8176-44f6-acb0-d99ed4037030. Source: http://collections.ala.org.au/public/show/dr340 (source published on 2015-01-07)
Australian Museum. Australian Museum provider for OZCAM. Record ID: 1ab4d517-bdce-4cab-ac4b-1e04e4482df9. Source: http://collections.ala.org.au/public/show/dr340 (source published on 2015-01-07)
Australian Museum. Australian Museum provider for OZCAM. Record ID: e7bece63-4e29-4ef2-b0b4-17b98562f0bb. Source: http://collections.ala.org.au/public/show/dr340 (source published on 2015-01-07)
Australian Museum. Australian Museum provider for OZCAM. Record ID: b50d429f-c1a4-4ea0-8553-d140f175f9f6. Source: http://collections.ala.org.au/public/show/dr340 (source published on 2015-01-07)
Australian Museum. Australian Museum provider for OZCAM. Record ID: ef9f1353-6313-4565-a54b-67a719d8ea06. Source: http://collections.ala.org.au/public/show/dr340 (source published on 2015-01-07)
Australian Museum. Australian Museum provider for OZCAM. Record ID: f53a9bfe-e064-4fb3-b0d5-ccc80f9947f4. Source: http://collections.ala.org.au/public/show/dr340 (source published on 2015-01-07)
Australian Museum. Australian Museum provider for OZCAM. Record ID: 65b331ba-0de4-4875-8990-7896fe0b8f20. Source: http://collections.ala.org.au/public/show/dr340 (source published on 2015-01-07)
Australian Museum. Australian Museum provider for OZCAM. Record ID: fe8362e5-5577-4e66-9071-618d325a09da. Source: http://collections.ala.org.au/public/show/dr340 (source published on 2015-01-07)
Australian Museum. Australian Museum provider for OZCAM. Record ID: cbb91347-cb9a-4439-89a0-4f6b4c78c8b6. Source: http://collections.ala.org.au/public/show/dr340 (source published on 2015-01-07)
Australian Museum. Australian Museum provider for OZCAM. Record ID: 7bd45a0f-3a73-4eae-ad19-95b347e1c527. Source: http://collections.ala.org.au/public/show/dr340 (source published on 2015-01-07)
Australian Museum. Australian Museum provider for OZCAM. Record ID: 0ca0f04e-ebe4-4472-888f-8362f2c0ff86. Source: http://collections.ala.org.au/public/show/dr340 (source published on 2015-01-07)
Australian Museum. Australian Museum provider for OZCAM. Record ID: 3a5d6452-be6a-4fda-9a59-105c8f2a81b7. Source: http://collections.ala.org.au/public/show/dr340 (source published on 2015-01-07)
Australian Museum. Australian Museum provider for OZCAM. Record ID: 81e13b84-8a6e-4061-98bc-df8b99033a43. Source: http://collections.ala.org.au/public/show/dr340 (source published on 2015-01-07)
Australian Museum. Australian Museum provider for OZCAM. Record ID: 7622483b-05eb-48b7-8b0b-f470d310e54c. Source: http://collections.ala.org.au/public/show/dr340 (source published on 2015-01-07)
Australian Museum. Australian Museum provider for OZCAM. Record ID: 55376a92-f5a7-4ed1-968d-fdd1dccddc50. Source: http://collections.ala.org.au/public/show/dr340 (source published on 2015-01-07)
Australian Museum. Australian Museum provider for OZCAM. Record ID: f22d9af9-75aa-4b05-9450-c9adcb51fc82. Source: http://collections.ala.org.au/public/show/dr340 (source published on 2015-01-07)
Australian Museum. Australian Museum provider for OZCAM. Record ID: 47aa011c-5834-42a7-b94f-089cd1a4a209. Source: http://collections.ala.org.au/public/show/dr340 (source published on 2015-01-07)
Australian Museum. Australian Museum provider for OZCAM. Record ID: 2a695ed0-6819-4989-9194-2b83f0e00b92. Source: http://collections.ala.org.au/public/show/dr340 (source published on 2015-01-07)
Australian Museum. Australian Museum provider for OZCAM. Record ID: 91f756b9-683d-43f9-ba99-f375c36e825c. Source: http://collections.ala.org.au/public/show/dr340 (source published on 2015-01-07)
Australian Museum. Australian Museum provider for OZCAM. Record ID: 3f9c8786-2b54-4b07-a115-9db5bfdae51c. Source: http://collections.ala.org.au/public/show/dr340 (source published on 2015-01-07)
Australian Museum. Australian Museum provider for OZCAM. Record ID: 0a8a70eb-9b28-437c-8dbb-628fed2ea50e. Source: http://collections.ala.org.au/public/show/dr340 (source published on 2015-01-07)
Australian Museum. Australian Museum provider for OZCAM. Record ID: a9d75c43-6960-4fd0-b4fc-e3e55d77557b. Source: http://collections.ala.org.au/public/show/dr340 (source published on 2015-01-07)
Australian Museum. Australian Museum provider for OZCAM. Record ID: c42473b0-4f56-4670-b4f2-86733dd4b363. Source: http://collections.ala.org.au/public/show/dr340 (source published on 2015-01-07)
Australian Museum. Australian Museum provider for OZCAM. Record ID: 9734dfed-6191-49ec-a3ff-56bc194a1755. Source: http://collections.ala.org.au/public/show/dr340 (source published on 2015-01-07)
Australian Museum. Australian Museum provider for OZCAM. Record ID: 87783a08-1ccc-425d-a214-ae862aa35a78. Source: http://collections.ala.org.au/public/show/dr340 (source published on 2015-01-07)
Australian Museum. Australian Museum provider for OZCAM. Record ID: 45b62c04-9ba9-4a55-a127-e782d3f1400c. Source: http://collections.ala.org.au/public/show/dr340 (source published on 2015-01-07)
Australian Museum. Australian Museum provider for OZCAM. Record ID: dc2eb9b1-b317-49bf-afbe-2b71239d7410. Source: http://collections.ala.org.au/public/show/dr340 (source published on 2015-01-07)
Australian Museum. Australian Museum provider for OZCAM. Record ID: 712af1ef-ccb7-4ed9-9ea8-eb54de02d059. Source: http://collections.ala.org.au/public/show/dr340 (source published on 2015-01-07)
Australian Museum. Australian Museum provider for OZCAM. Record ID: 098a96d1-2571-4ddf-8c73-85d756b86366. Source: http://collections.ala.org.au/public/show/dr340 (source published on 2015-01-07)
Australian Museum. Australian Museum provider for OZCAM. Record ID: c10f09bf-038f-4b9a-aad2-f61b902fdd51. Source: http://collections.ala.org.au/public/show/dr340 (source published on 2015-01-07)
Australian Museum. Australian Museum provider for OZCAM. Record ID: 1f18d0fa-145e-4104-89d6-66abb696fb20. Source: http://collections.ala.org.au/public/show/dr340 (source published on 2015-01-07)
Australian Museum. Australian Museum provider for OZCAM. Record ID: 802aca41-6290-426c-929a-dccf50ca1211. Source: http://collections.ala.org.au/public/show/dr340 (source published on 2015-01-07)
Australian Museum. Australian Museum provider for OZCAM. Record ID: bffbdac9-b70f-48bf-b116-c4e577f95fdb. Source: http://collections.ala.org.au/public/show/dr340 (source published on 2015-01-07)
Australian Museum. Australian Museum provider for OZCAM. Record ID: 7b763ad6-772b-46b0-9ef3-188bed2144fa. Source: http://collections.ala.org.au/public/show/dr340 (source published on 2015-01-07)
Australian Museum. Australian Museum provider for OZCAM. Record ID: 4305912a-9524-4f0e-8030-d0d304a5030e. Source: http://collections.ala.org.au/public/show/dr340 (source published on 2015-01-07)
Australian Museum. Australian Museum provider for OZCAM. Record ID: 865fac93-8caf-4eec-9d06-6f898b08a8d1. Source: http://collections.ala.org.au/public/show/dr340 (source published on 2015-01-07)
Australian Museum. Australian Museum provider for OZCAM. Record ID: b47c82ba-cca1-4550-b366-b2ba809b06c6. Source: http://collections.ala.org.au/public/show/dr340 (source published on 2015-01-07)
Australian Museum. Australian Museum provider for OZCAM. Record ID: e162e1f7-acd8-4927-9f84-e55bf456295b. Source: http://collections.ala.org.au/public/show/dr340 (source published on 2015-01-07)
Australian Museum. Australian Museum provider for OZCAM. Record ID: c28447d0-8e5b-4e77-8b3f-81b4b41fc759. Source: http://collections.ala.org.au/public/show/dr340 (source published on 2015-01-07)
Australian Museum. Australian Museum provider for OZCAM. Record ID: 514c07e5-56d4-4a6c-8d15-22128dfd07bb. Source: http://collections.ala.org.au/public/show/dr340 (source published on 2015-01-07)
Australian Museum. Australian Museum provider for OZCAM. Record ID: 60844551-a29a-410e-8de5-86a85047bd58. Source: http://collections.ala.org.au/public/show/dr340 (source published on 2015-01-07)
Australian Museum. Australian Museum provider for OZCAM. Record ID: be58655f-f65b-48eb-9eaf-ac8ffcea602b. Source: http://collections.ala.org.au/public/show/dr340 (source published on 2015-01-07)
Australian Museum. Australian Museum provider for OZCAM. Record ID: cc89bee4-fc28-4cc4-b7f2-d5e00efbc04d. Source: http://collections.ala.org.au/public/show/dr340 (source published on 2015-01-07)
Australian Museum. Australian Museum provider for OZCAM. Record ID: 31d04bc9-905b-4eaa-b16a-6b2fe79ed201. Source: http://collections.ala.org.au/public/show/dr340 (source published on 2015-01-07)
Australian Museum. Australian Museum provider for OZCAM. Record ID: 6ba6a5f0-4475-4ea9-b216-08263e1f9307. Source: http://collections.ala.org.au/public/show/dr340 (source published on 2015-01-07)
Australian Museum. Australian Museum provider for OZCAM. Record ID: 3e678c77-46ed-4791-a025-c6f620eb4705. Source: http://collections.ala.org.au/public/show/dr340 (source published on 2015-01-07)
Australian Museum. Australian Museum provider for OZCAM. Record ID: 049d4375-f3bb-4ddf-ac33-560b97ee0825. Source: http://collections.ala.org.au/public/show/dr340 (source published on 2015-01-07)
Australian Museum. Australian Museum provider for OZCAM. Record ID: 89c78c7d-fc08-4c06-80ac-6ede8468a0f8. Source: http://collections.ala.org.au/public/show/dr340 (source published on 2015-01-07)
Australian Museum. Australian Museum provider for OZCAM. Record ID: b6f2abd6-3525-4f06-a24f-393424c60e81. Source: http://collections.ala.org.au/public/show/dr340 (source published on 2015-01-07)
Australian Museum. Australian Museum provider for OZCAM. Record ID: 806958c9-b5b7-4a04-bd4e-c7fa04d61480. Source: http://collections.ala.org.au/public/show/dr340 (source published on 2015-01-07)
Australian Museum. Australian Museum provider for OZCAM. Record ID: aa7032b1-5596-47e5-958d-c3602c1f9c53. Source: http://collections.ala.org.au/public/show/dr340 (source published on 2015-01-07)
Australian Museum. Australian Museum provider for OZCAM. Record ID: 4568efea-05ec-47f0-86a1-399268f1c6e0. Source: http://collections.ala.org.au/public/show/dr340 (source published on 2015-01-07)
Australian Museum. Australian Museum provider for OZCAM. Record ID: 50424666-3f3a-404a-b3e2-aded1e608b78. Source: http://collections.ala.org.au/public/show/dr340 (source published on 2015-01-07)
Australian Museum. Australian Museum provider for OZCAM. Record ID: 29e90c81-fc24-45df-9745-3b2ec0a926c6. Source: http://collections.ala.org.au/public/show/dr340 (source published on 2015-01-07)
Australian Museum. Australian Museum provider for OZCAM. Record ID: ad586ee8-6266-463f-9fd8-39fe48f1ca4d. Source: http://collections.ala.org.au/public/show/dr340 (source published on 2015-01-07)
Australian Museum. Australian Museum provider for OZCAM. Record ID: e153ec9f-3d29-4d29-a3da-e76e811813d3. Source: http://collections.ala.org.au/public/show/dr340 (source published on 2015-01-07)
Australian Museum. Australian Museum provider for OZCAM. Record ID: eded77a3-8008-444e-99d8-1169c4d5aa8c. Source: http://collections.ala.org.au/public/show/dr340 (source published on 2015-01-07)
Australian Museum. Australian Museum provider for OZCAM. Record ID: 348c5c65-7573-424b-80ab-e1823ef7717b. Source: http://collections.ala.org.au/public/show/dr340 (source published on 2015-01-07)
Australian Museum. Australian Museum provider for OZCAM. Record ID: 982caff3-b573-4566-a4ee-922ffc9fe9d0. Source: http://collections.ala.org.au/public/show/dr340 (source published on 2015-01-07)
Australian Museum. Australian Museum provider for OZCAM. Record ID: 1f53e0d1-e9e3-4aeb-8a12-3754a0579bb6. Source: http://collections.ala.org.au/public/show/dr340 (source published on 2015-01-07)
Australian Museum. Australian Museum provider for OZCAM. Record ID: 18590e5e-8b5b-4c5a-96bb-5c5dd6f551bc. Source: http://collections.ala.org.au/public/show/dr340 (source published on 2015-01-07)
Australian Museum. Australian Museum provider for OZCAM. Record ID: dc2ce1ba-1e83-4aff-8ce3-5e4aa7131efb. Source: http://collections.ala.org.au/public/show/dr340 (source published on 2015-01-07)
Australian Museum. Australian Museum provider for OZCAM. Record ID: a82c9154-d329-4f9c-a8e7-b4b55252d120. Source: http://collections.ala.org.au/public/show/dr340 (source published on 2015-01-07)
Australian Museum. Australian Museum provider for OZCAM. Record ID: 7cef159f-7df7-4482-a7f0-e199ebddd567. Source: http://collections.ala.org.au/public/show/dr340 (source published on 2015-01-07)
Australian Museum. Australian Museum provider for OZCAM. Record ID: 8d50df51-f23d-4ee2-8b3f-ee7962c975d6. Source: http://collections.ala.org.au/public/show/dr340 (source published on 2015-01-07)
Australian Museum. Australian Museum provider for OZCAM. Record ID: a02740b5-a2cf-44b6-8ac4-9a0239cc565a. Source: http://collections.ala.org.au/public/show/dr340 (source published on 2015-01-07)
Australian Museum. Australian Museum provider for OZCAM. Record ID: 973c5da5-9ea1-4fda-9ad9-236a95241343. Source: http://collections.ala.org.au/public/show/dr340 (source published on 2015-01-07)
Australian Museum. Australian Museum provider for OZCAM. Record ID: 0e307126-1a0e-42c5-82ae-68bd23729c1b. Source: http://collections.ala.org.au/public/show/dr340 (source published on 2015-01-07)
Australian Museum. Australian Museum provider for OZCAM. Record ID: af7ba5f6-101d-4786-b897-bd92b8497420. Source: http://collections.ala.org.au/public/show/dr340 (source published on 2015-01-07)
Australian Museum. Australian Museum provider for OZCAM. Record ID: 7e8c4486-cd3a-444c-898c-a9e06926533a. Source: http://collections.ala.org.au/public/show/dr340 (source published on 2015-01-07)
Australian Museum. Australian Museum provider for OZCAM. Record ID: 2afb0722-89a4-4a6d-8143-21f21667a8e2. Source: http://collections.ala.org.au/public/show/dr340 (source published on 2015-01-07)
Australian Museum. Australian Museum provider for OZCAM. Record ID: 152cef86-c79f-4b1d-80c4-8907d4f58727. Source: http://collections.ala.org.au/public/show/dr340 (source published on 2015-01-07)
Australian Museum. Australian Museum provider for OZCAM. Record ID: 1ac66f64-b167-4a41-8958-7987cfb634fb. Source: http://collections.ala.org.au/public/show/dr340 (source published on 2015-01-07)
Australian Museum. Australian Museum provider for OZCAM. Record ID: 6d6c8c73-d98a-49ea-aa4a-ed7dca5d68ec. Source: http://collections.ala.org.au/public/show/dr340 (source published on 2015-01-07)
Australian Museum. Australian Museum provider for OZCAM. Record ID: ac489ce3-4ba4-4fd4-b1a1-54eda48bddc0. Source: http://collections.ala.org.au/public/show/dr340 (source published on 2015-01-07)
Australian Museum. Australian Museum provider for OZCAM. Record ID: b47aae86-0717-4a8c-9dc8-18a78db90911. Source: http://collections.ala.org.au/public/show/dr340 (source published on 2015-01-07)
Australian Museum. Australian Museum provider for OZCAM. Record ID: 987bb62a-2d00-4bea-8ace-8dd8b12cce15. Source: http://collections.ala.org.au/public/show/dr340 (source published on 2015-01-07)
Australian Museum. Australian Museum provider for OZCAM. Record ID: c8004148-737c-40d4-85b2-b516c993dc55. Source: http://collections.ala.org.au/public/show/dr340 (source published on 2015-01-07)
Australian Museum. Australian Museum provider for OZCAM. Record ID: 3179e65a-5ca7-4e24-a463-b1656900d9cc. Source: http://collections.ala.org.au/public/show/dr340 (source published on 2015-01-07)
Australian Museum. Australian Museum provider for OZCAM. Record ID: cb54890c-79a1-4e72-8cb3-5bd073cb9ca0. Source: http://collections.ala.org.au/public/show/dr340 (source published on 2015-01-07)
Australian Museum. Australian Museum provider for OZCAM. Record ID: 64b1e696-662f-425e-96a9-9d63e2c20260. Source: http://collections.ala.org.au/public/show/dr340 (source published on 2015-01-07)
Australian Museum. Australian Museum provider for OZCAM. Record ID: 385b99c3-de5a-49a8-8f94-ca6261ea15f2. Source: http://collections.ala.org.au/public/show/dr340 (source published on 2015-01-07)
Australian Museum. Australian Museum provider for OZCAM. Record ID: 969baac9-91c8-404b-89c2-2905f6cf4357. Source: http://collections.ala.org.au/public/show/dr340 (source published on 2015-01-07)
Australian Museum. Australian Museum provider for OZCAM. Record ID: f741b363-0a58-4fdc-a622-8c2dbe43d13e. Source: http://collections.ala.org.au/public/show/dr340 (source published on 2015-01-07)
Australian Museum. Australian Museum provider for OZCAM. Record ID: 794b4c1e-2989-443e-934b-0be13d879a3e. Source: http://collections.ala.org.au/public/show/dr340 (source published on 2015-01-07)
Australian Museum. Australian Museum provider for OZCAM. Record ID: cc043672-c3eb-40a6-8abb-f4752ac08030. Source: http://collections.ala.org.au/public/show/dr340 (source published on 2015-01-07)
Australian Museum. Australian Museum provider for OZCAM. Record ID: 909f6b50-04a9-4291-aa8e-9ac434a5534a. Source: http://collections.ala.org.au/public/show/dr340 (source published on 2015-01-07)
Australian Museum. Australian Museum provider for OZCAM. Record ID: ee1256cd-bc6b-45e1-b595-9e6786c0de17. Source: http://collections.ala.org.au/public/show/dr340 (source published on 2015-01-07)
Australian Museum. Australian Museum provider for OZCAM. Record ID: 8f968ea7-a949-4c29-bcfb-3a4326dce3be. Source: http://collections.ala.org.au/public/show/dr340 (source published on 2015-01-07)
Australian Museum. Australian Museum provider for OZCAM. Record ID: 56657df0-a5c6-4381-bb9e-627eb10f87bd. Source: http://collections.ala.org.au/public/show/dr340 (source published on 2015-01-07)
Australian Museum. Australian Museum provider for OZCAM. Record ID: c909582e-3615-4dbc-8add-af6da4fca85d. Source: http://collections.ala.org.au/public/show/dr340 (source published on 2015-01-07)
Australian Museum. Australian Museum provider for OZCAM. Record ID: 72e5edde-4aea-42b7-a62d-4b2c6beb5019. Source: http://collections.ala.org.au/public/show/dr340 (source published on 2015-01-07)
Australian Museum. Australian Museum provider for OZCAM. Record ID: a1f22a70-31f9-4149-9f8c-fd01b1d3d2b3. Source: http://collections.ala.org.au/public/show/dr340 (source published on 2015-01-07)
Australian Museum. Australian Museum provider for OZCAM. Record ID: 591dc4e9-63c5-47ca-8896-d04e08263d22. Source: http://collections.ala.org.au/public/show/dr340 (source published on 2015-01-07)
Australian Museum. Australian Museum provider for OZCAM. Record ID: fbad4218-8186-4f49-b61d-21370c595be7. Source: http://collections.ala.org.au/public/show/dr340 (source published on 2015-01-07)
Australian Museum. Australian Museum provider for OZCAM. Record ID: 70a54739-5102-44fa-9a5b-9ca223b42df8. Source: http://collections.ala.org.au/public/show/dr340 (source published on 2015-01-07)
Australian Museum. Australian Museum provider for OZCAM. Record ID: fc35fec0-a1d4-41ef-ad0f-7b5cfa136313. Source: http://collections.ala.org.au/public/show/dr340 (source published on 2015-01-07)
Australian Museum. Australian Museum provider for OZCAM. Record ID: bf48bda7-9566-409c-85a5-09364f1d2c78. Source: http://collections.ala.org.au/public/show/dr340 (source published on 2015-01-07)
Australian Museum. Australian Museum provider for OZCAM. Record ID: 362b6007-67f2-4206-b553-f9f0c6e367f8. Source: http://collections.ala.org.au/public/show/dr340 (source published on 2015-01-07)
Australian Museum. Australian Museum provider for OZCAM. Record ID: aa1c2e2d-a179-40f7-8630-b7f1fd6ccc6b. Source: http://collections.ala.org.au/public/show/dr340 (source published on 2015-01-07)
Australian Museum. Australian Museum provider for OZCAM. Record ID: 915a8deb-eb32-48ce-9563-f872ff8c82f7. Source: http://collections.ala.org.au/public/show/dr340 (source published on 2015-01-07)
Australian Museum. Australian Museum provider for OZCAM. Record ID: 6c1b1941-5996-498c-aa72-d45ceae777d4. Source: http://collections.ala.org.au/public/show/dr340 (source published on 2015-01-07)
Australian Museum. Australian Museum provider for OZCAM. Record ID: 86f993df-d92d-40b0-a737-284877e0f718. Source: http://collections.ala.org.au/public/show/dr340 (source published on 2015-01-07)
Australian Museum. Australian Museum provider for OZCAM. Record ID: 4ecb351c-5b21-4551-b350-d6b2c416f0a6. Source: http://collections.ala.org.au/public/show/dr340 (source published on 2015-01-07)
Australian Museum. Australian Museum provider for OZCAM. Record ID: 9568abf0-62cd-4917-8dda-2ca95d451da5. Source: http://collections.ala.org.au/public/show/dr340 (source published on 2015-01-07)
Australian Museum. Australian Museum provider for OZCAM. Record ID: d0bbf2bd-e813-4e38-9d46-7810fde7ded7. Source: http://collections.ala.org.au/public/show/dr340 (source published on 2015-01-07)
Australian Museum. Australian Museum provider for OZCAM. Record ID: efebb6c6-e2f3-4259-94fd-a89f4114a981. Source: http://collections.ala.org.au/public/show/dr340 (source published on 2015-01-07)
Australian Museum. Australian Museum provider for OZCAM. Record ID: bc963f06-ecea-4af0-bcbe-22283750d7db. Source: http://collections.ala.org.au/public/show/dr340 (source published on 2015-01-07)
Australian Museum. Australian Museum provider for OZCAM. Record ID: 34bd6e4c-daa5-4df9-9532-7689459adcaa. Source: http://collections.ala.org.au/public/show/dr340 (source published on 2015-01-07)
Australian Museum. Australian Museum provider for OZCAM. Record ID: 84b8a1cb-8aab-4fa4-8648-11b945d5151c. Source: http://collections.ala.org.au/public/show/dr340 (source published on 2015-01-07)
Australian Museum. Australian Museum provider for OZCAM. Record ID: 17b038ed-9877-4080-a5e2-c21e0a816a74. Source: http://collections.ala.org.au/public/show/dr340 (source published on 2015-01-07)
Australian Museum. Australian Museum provider for OZCAM. Record ID: 3476c703-14ca-4461-918d-ae7dc5049100. Source: http://collections.ala.org.au/public/show/dr340 (source published on 2015-01-07)
Australian Museum. Australian Museum provider for OZCAM. Record ID: 045afec8-51ad-4ec4-8147-f439b996b886. Source: http://collections.ala.org.au/public/show/dr340 (source published on 2015-01-07)
Australian Museum. Australian Museum provider for OZCAM. Record ID: aa626175-83c7-496d-81d2-7022ddc5a1c1. Source: http://collections.ala.org.au/public/show/dr340 (source published on 2015-01-07)
Australian Museum. Australian Museum provider for OZCAM. Record ID: 30ef0a4e-b2b8-403f-b20b-1bd11bb38214. Source: http://collections.ala.org.au/public/show/dr340 (source published on 2015-01-07)
Australian Museum. Australian Museum provider for OZCAM. Record ID: 37828f09-2bb2-4f57-bb4f-1c3a75dd005f. Source: http://collections.ala.org.au/public/show/dr340 (source published on 2015-01-07)
Australian Museum. Australian Museum provider for OZCAM. Record ID: 95cbe8a3-9a8f-4b58-ba91-3c7e62a2d8f6. Source: http://collections.ala.org.au/public/show/dr340 (source published on 2015-01-07)
Australian Museum. Australian Museum provider for OZCAM. Record ID: 0486fa5c-2975-4229-a227-8e6d9ee82045. Source: http://collections.ala.org.au/public/show/dr340 (source published on 2015-01-07)
Australian Museum. Australian Museum provider for OZCAM. Record ID: e8c53a52-40ef-4d36-aeeb-d2a937f49fab. Source: http://collections.ala.org.au/public/show/dr340 (source published on 2015-01-07)
Australian Museum. Australian Museum provider for OZCAM. Record ID: a2766a63-0def-4931-a9cd-4225aa5e74db. Source: http://collections.ala.org.au/public/show/dr340 (source published on 2015-01-07)
Australian Museum. Australian Museum provider for OZCAM. Record ID: 9076ec30-5eda-479b-97cb-ade28892465b. Source: http://collections.ala.org.au/public/show/dr340 (source published on 2015-01-07)
Australian Museum. Australian Museum provider for OZCAM. Record ID: fec28e06-65a4-4251-83be-605a0633de9e. Source: http://collections.ala.org.au/public/show/dr340 (source published on 2015-01-07)
Australian Museum. Australian Museum provider for OZCAM. Record ID: 4b13d857-0472-45de-b6b6-2fd2a8aae52f. Source: http://collections.ala.org.au/public/show/dr340 (source published on 2015-01-07)
Australian Museum. Australian Museum provider for OZCAM. Record ID: dec18afb-9d64-4a9e-a2d9-297af7f982e7. Source: http://collections.ala.org.au/public/show/dr340 (source published on 2015-01-07)
Australian Museum. Australian Museum provider for OZCAM. Record ID: 2a8568ae-331a-49ee-889a-8543c93932e7. Source: http://collections.ala.org.au/public/show/dr340 (source published on 2015-01-07)
Australian Museum. Australian Museum provider for OZCAM. Record ID: d4b32557-ff44-4987-910d-bd64a1962e08. Source: http://collections.ala.org.au/public/show/dr340 (source published on 2015-01-07)
Australian Museum. Australian Museum provider for OZCAM. Record ID: 64083ad9-01f1-48f0-8cb2-c18411aa75a9. Source: http://collections.ala.org.au/public/show/dr340 (source published on 2015-01-07)
Australian Museum. Australian Museum provider for OZCAM. Record ID: db212872-af86-4232-89e7-af71630e680f. Source: http://collections.ala.org.au/public/show/dr340 (source published on 2015-01-07)
Australian Museum. Australian Museum provider for OZCAM. Record ID: f1183b69-d5e3-44b8-be7c-8169b1699a10. Source: http://collections.ala.org.au/public/show/dr340 (source published on 2015-01-07)
Australian Museum. Australian Museum provider for OZCAM. Record ID: 8c7c179b-e7b1-438e-8d51-3f58e436dbcf. Source: http://collections.ala.org.au/public/show/dr340 (source published on 2015-01-07)
Australian Museum. Australian Museum provider for OZCAM. Record ID: 3b80ad44-f947-44ee-8af0-74607d9b842d. Source: http://collections.ala.org.au/public/show/dr340 (source published on 2015-01-07)
Australian Museum. Australian Museum provider for OZCAM. Record ID: b40f4a19-12a1-495b-8172-3e23ea1cb0d3. Source: http://collections.ala.org.au/public/show/dr340 (source published on 2015-01-07)
Australian Museum. Australian Museum provider for OZCAM. Record ID: c67a9c1d-bbc8-4e0e-8ad9-a1b08cbc4531. Source: http://collections.ala.org.au/public/show/dr340 (source published on 2015-01-07)
Australian Museum. Australian Museum provider for OZCAM. Record ID: 21898d2a-2f52-4de6-bd3a-d6f4d272fcb3. Source: http://collections.ala.org.au/public/show/dr340 (source published on 2015-01-07)
Australian Museum. Australian Museum provider for OZCAM. Record ID: 92710666-1763-44ac-ba15-d2a17df50f73. Source: http://collections.ala.org.au/public/show/dr340 (source published on 2015-01-07)
Australian Museum. Australian Museum provider for OZCAM. Record ID: dab91c4b-347d-4c6c-8513-4b307523eb7b. Source: http://collections.ala.org.au/public/show/dr340 (source published on 2015-01-07)
Australian Museum. Australian Museum provider for OZCAM. Record ID: 55226186-4acc-4e6a-9c6b-5071b5521b71. Source: http://collections.ala.org.au/public/show/dr340 (source published on 2015-01-07)
Australian Museum. Australian Museum provider for OZCAM. Record ID: 34b7a309-6662-46f2-8d90-cc535d30fcbd. Source: http://collections.ala.org.au/public/show/dr340 (source published on 2015-01-07)
Australian Museum. Australian Museum provider for OZCAM. Record ID: 211153bc-41b0-4b53-82f0-deaa84746d53. Source: http://collections.ala.org.au/public/show/dr340 (source published on 2015-01-07)
Australian Museum. Australian Museum provider for OZCAM. Record ID: b935eb0b-0d2f-4dd4-b06d-42d07abaeda6. Source: http://collections.ala.org.au/public/show/dr340 (source published on 2015-01-07)
Australian Museum. Australian Museum provider for OZCAM. Record ID: 33d118e2-d6cb-42e1-8520-8b3c5f60b034. Source: http://collections.ala.org.au/public/show/dr340 (source published on 2015-01-07)
Australian Museum. Australian Museum provider for OZCAM. Record ID: c352abe9-087d-430e-a70a-244641970373. Source: http://collections.ala.org.au/public/show/dr340 (source published on 2015-01-07)
Australian Museum. Australian Museum provider for OZCAM. Record ID: 03b20029-7f7e-480b-bc63-eaf0d87d4faa. Source: http://collections.ala.org.au/public/show/dr340 (source published on 2015-01-07)
Australian Museum. Australian Museum provider for OZCAM. Record ID: e6ff484c-0086-467b-8729-c76bef1bb27f. Source: http://collections.ala.org.au/public/show/dr340 (source published on 2015-01-07)
Australian Museum. Australian Museum provider for OZCAM. Record ID: b0a38dc8-9725-4f54-8a9b-b9dbd8456ee9. Source: http://collections.ala.org.au/public/show/dr340 (source published on 2015-01-07)
Australian Museum. Australian Museum provider for OZCAM. Record ID: 4fb16ced-ff24-4c63-9c39-ba6f670a4bf7. Source: http://collections.ala.org.au/public/show/dr340 (source published on 2015-01-07)
Australian Museum. Australian Museum provider for OZCAM. Record ID: 5a8b1cc1-faf1-4120-abd2-4465ca527eed. Source: http://collections.ala.org.au/public/show/dr340 (source published on 2015-01-07)
Australian Museum. Australian Museum provider for OZCAM. Record ID: b3cdc940-498c-468b-9d9a-377de64fd30f. Source: http://collections.ala.org.au/public/show/dr340 (source published on 2015-01-07)
Australian Museum. Australian Museum provider for OZCAM. Record ID: a3370837-1b2c-458e-b854-9d3d807e3d79. Source: http://collections.ala.org.au/public/show/dr340 (source published on 2015-01-07)
Australian Museum. Australian Museum provider for OZCAM. Record ID: ed9adf8a-2520-4670-9486-f1645ebe9a37. Source: http://collections.ala.org.au/public/show/dr340 (source published on 2015-01-07)
Australian Museum. Australian Museum provider for OZCAM. Record ID: 55ecf5ee-d778-416d-8718-934d65129aaf. Source: http://collections.ala.org.au/public/show/dr340 (source published on 2015-01-07)
Australian Museum. Australian Museum provider for OZCAM. Record ID: 8648cc4f-001b-4fde-8cef-a5d07debd3e4. Source: http://collections.ala.org.au/public/show/dr340 (source published on 2015-01-07)
Australian Museum. Australian Museum provider for OZCAM. Record ID: a0757385-e847-4a16-8bbd-6f880737e005. Source: http://collections.ala.org.au/public/show/dr340 (source published on 2015-01-07)
Australian Museum. Australian Museum provider for OZCAM. Record ID: 48aa4d5a-0945-4564-9a8b-c1f2204a824f. Source: http://collections.ala.org.au/public/show/dr340 (source published on 2015-01-07)
Australian Museum. Australian Museum provider for OZCAM. Record ID: d5df2304-3b67-457c-985c-48e7c1dcff1a. Source: http://collections.ala.org.au/public/show/dr340 (source published on 2015-01-07)
Australian Museum. Australian Museum provider for OZCAM. Record ID: f01c77ce-a50f-4f39-8ff7-6b570154ddcd. Source: http://collections.ala.org.au/public/show/dr340 (source published on 2015-01-07)
Australian Museum. Australian Museum provider for OZCAM. Record ID: 0c0300f1-30a5-41d8-bde2-7c65f0bddc3a. Source: http://collections.ala.org.au/public/show/dr340 (source published on 2015-01-07)
Australian Museum. Australian Museum provider for OZCAM. Record ID: 13d39be5-5f32-4693-b3b8-366a945c9199. Source: http://collections.ala.org.au/public/show/dr340 (source published on 2015-01-07)
Australian Museum. Australian Museum provider for OZCAM. Record ID: 1a3554f5-da1a-4cc9-bfcd-013bf64858a3. Source: http://collections.ala.org.au/public/show/dr340 (source published on 2015-01-07)
Australian Museum. Australian Museum provider for OZCAM. Record ID: 3d3e0d4a-705c-4f70-bdaa-665f72eb5cd4. Source: http://collections.ala.org.au/public/show/dr340 (source published on 2015-01-07)
Australian Museum. Australian Museum provider for OZCAM. Record ID: da1d5d61-2205-4086-aca5-d0e444b8bfad. Source: http://collections.ala.org.au/public/show/dr340 (source published on 2015-01-07)
Australian Museum. Australian Museum provider for OZCAM. Record ID: 320ae994-c0fd-445e-99b3-fc69433eb485. Source: http://collections.ala.org.au/public/show/dr340 (source published on 2015-01-07)
Australian Museum. Australian Museum provider for OZCAM. Record ID: 1d4d7efb-e564-4bcd-ab46-743e668812e6. Source: http://collections.ala.org.au/public/show/dr340 (source published on 2015-01-07)
Australian Museum. Australian Museum provider for OZCAM. Record ID: a540e48f-f144-4e71-91d2-858e74547073. Source: http://collections.ala.org.au/public/show/dr340 (source published on 2015-01-07)
Australian Museum. Australian Museum provider for OZCAM. Record ID: 77169637-1e96-4419-a44d-07edaa3c98a4. Source: http://collections.ala.org.au/public/show/dr340 (source published on 2015-01-07)
Australian Museum. Australian Museum provider for OZCAM. Record ID: b54cc965-3ccd-46a2-a1c3-13288cd01329. Source: http://collections.ala.org.au/public/show/dr340 (source published on 2015-01-07)
Australian Museum. Australian Museum provider for OZCAM. Record ID: 340b7047-20d2-467c-bfd7-a6d6367a7ddc. Source: http://collections.ala.org.au/public/show/dr340 (source published on 2015-01-07)
Australian Museum. Australian Museum provider for OZCAM. Record ID: 21f9b6d4-27af-4161-83b4-080dac737ce8. Source: http://collections.ala.org.au/public/show/dr340 (source published on 2015-01-07)
Australian Museum. Australian Museum provider for OZCAM. Record ID: aab2dbf1-c291-4c41-96b9-f22e680b29dc. Source: http://collections.ala.org.au/public/show/dr340 (source published on 2015-01-07)
Australian Museum. Australian Museum provider for OZCAM. Record ID: 780dd462-7de2-4dbb-9e0a-c3c61a6485ad. Source: http://collections.ala.org.au/public/show/dr340 (source published on 2015-01-07)
Australian Museum. Australian Museum provider for OZCAM. Record ID: 8579d615-b7a1-4d5e-81b6-c976cfb82dc9. Source: http://collections.ala.org.au/public/show/dr340 (source published on 2015-01-07)
Australian Museum. Australian Museum provider for OZCAM. Record ID: 751c6d76-8d68-40bf-8d8a-65b1dde13e36. Source: http://collections.ala.org.au/public/show/dr340 (source published on 2015-01-07)
Australian Museum. Australian Museum provider for OZCAM. Record ID: 0e68d729-c192-4054-b902-b6c8dcd4e580. Source: http://collections.ala.org.au/public/show/dr340 (source published on 2015-01-07)
Australian Museum. Australian Museum provider for OZCAM. Record ID: 8d453a34-6546-4502-86cd-618a9a9ac86c. Source: http://collections.ala.org.au/public/show/dr340 (source published on 2015-01-07)
Australian Museum. Australian Museum provider for OZCAM. Record ID: db66938a-7479-4ee4-a400-80e3388de17c. Source: http://collections.ala.org.au/public/show/dr340 (source published on 2015-01-07)
Australian Museum. Australian Museum provider for OZCAM. Record ID: 0640f740-1624-4071-a408-aba651be5d43. Source: http://collections.ala.org.au/public/show/dr340 (source published on 2015-01-07)
Australian Museum. Australian Museum provider for OZCAM. Record ID: b7dca843-f223-4a02-81f6-97cc8cccf7e1. Source: http://collections.ala.org.au/public/show/dr340 (source published on 2015-01-07)
Australian Museum. Australian Museum provider for OZCAM. Record ID: e337ab54-7eb1-4e2f-9ee2-e39c233d0a7f. Source: http://collections.ala.org.au/public/show/dr340 (source published on 2015-01-07)
Australian Museum. Australian Museum provider for OZCAM. Record ID: c3d1ccbe-12b3-4fbc-b780-84743a1b291d. Source: http://collections.ala.org.au/public/show/dr340 (source published on 2015-01-07)
Australian Museum. Australian Museum provider for OZCAM. Record ID: 6969f626-c759-4fad-9e7e-324c8f77a3a5. Source: http://collections.ala.org.au/public/show/dr340 (source published on 2015-01-07)
Australian Museum. Australian Museum provider for OZCAM. Record ID: 8d1e7f59-fc2e-40a3-a3d3-37cd057a6825. Source: http://collections.ala.org.au/public/show/dr340 (source published on 2015-01-07)
Australian Museum. Australian Museum provider for OZCAM. Record ID: 179b85be-3c27-4b00-9c24-38cf92b9605b. Source: http://collections.ala.org.au/public/show/dr340 (source published on 2015-01-07)
Australian Museum. Australian Museum provider for OZCAM. Record ID: e905cb35-2a9d-46a8-a8f5-52e1a432f47d. Source: http://collections.ala.org.au/public/show/dr340 (source published on 2015-01-07)
Australian Museum. Australian Museum provider for OZCAM. Record ID: 6d5322cd-2799-41e8-994d-29def1feb4fc. Source: http://collections.ala.org.au/public/show/dr340 (source published on 2015-01-07)
Australian Museum. Australian Museum provider for OZCAM. Record ID: 953bd992-d533-4222-8931-326e657cbd5e. Source: http://collections.ala.org.au/public/show/dr340 (source published on 2015-01-07)
Australian Museum. Australian Museum provider for OZCAM. Record ID: d432f194-be43-4891-ad01-2ba9aac25856. Source: http://collections.ala.org.au/public/show/dr340 (source published on 2015-01-07)
Australian Museum. Australian Museum provider for OZCAM. Record ID: 67505e35-a7eb-4171-8a49-3ecc99f525d6. Source: http://collections.ala.org.au/public/show/dr340 (source published on 2015-01-07)
Australian Museum. Australian Museum provider for OZCAM. Record ID: 79c44507-eca2-4de7-9dd7-c92b11202cae. Source: http://collections.ala.org.au/public/show/dr340 (source published on 2015-01-07)
Australian Museum. Australian Museum provider for OZCAM. Record ID: 271ced32-e16b-4a72-b9e1-35988cebb77c. Source: http://collections.ala.org.au/public/show/dr340 (source published on 2015-01-07)
Australian Museum. Australian Museum provider for OZCAM. Record ID: e219597f-e117-4f1e-9328-6c8059ad61e0. Source: http://collections.ala.org.au/public/show/dr340 (source published on 2015-01-07)
Australian Museum. Australian Museum provider for OZCAM. Record ID: f9cb1ca8-5cc6-4ab9-87ea-addcb71e6118. Source: http://collections.ala.org.au/public/show/dr340 (source published on 2015-01-07)
Australian Museum. Australian Museum provider for OZCAM. Record ID: 673b01da-ef97-439b-9ea4-2fd2bac07519. Source: http://collections.ala.org.au/public/show/dr340 (source published on 2015-01-07)
Australian Museum. Australian Museum provider for OZCAM. Record ID: 80adbb29-57ad-46dd-aed2-660d1590997b. Source: http://collections.ala.org.au/public/show/dr340 (source published on 2015-01-07)
Australian Museum. Australian Museum provider for OZCAM. Record ID: 42716245-913b-4be8-815b-1aecb377857a. Source: http://collections.ala.org.au/public/show/dr340 (source published on 2015-01-07)
Australian Museum. Australian Museum provider for OZCAM. Record ID: 8050a3aa-a0b0-4748-b7ad-52f6a6c8edd2. Source: http://collections.ala.org.au/public/show/dr340 (source published on 2015-01-07)
Australian Museum. Australian Museum provider for OZCAM. Record ID: a59a67bb-148e-4714-a5a9-4c4f0a69afa2. Source: http://collections.ala.org.au/public/show/dr340 (source published on 2015-01-07)
Australian Museum. Australian Museum provider for OZCAM. Record ID: 538ce34b-4c63-49e1-95a3-437f251b9c5e. Source: http://collections.ala.org.au/public/show/dr340 (source published on 2015-01-07)
Australian Museum. Australian Museum provider for OZCAM. Record ID: 751a499b-67f2-46a1-a968-bf0d199bf9fa. Source: http://collections.ala.org.au/public/show/dr340 (source published on 2015-01-07)
Australian Museum. Australian Museum provider for OZCAM. Record ID: ac8d7092-811b-4c58-be40-dd9430f71cac. Source: http://collections.ala.org.au/public/show/dr340 (source published on 2015-01-07)
Australian Museum. Australian Museum provider for OZCAM. Record ID: 3e4d2279-7009-4d68-98b5-2457dac36252. Source: http://collections.ala.org.au/public/show/dr340 (source published on 2015-01-07)
Australian Museum. Australian Museum provider for OZCAM. Record ID: 5c5c8d19-729a-4b25-bb2a-afa15fa5b701. Source: http://collections.ala.org.au/public/show/dr340 (source published on 2015-01-07)
Australian Museum. Australian Museum provider for OZCAM. Record ID: 97ba2528-3653-41a0-ad5b-6a2846799a1f. Source: http://collections.ala.org.au/public/show/dr340 (source published on 2015-01-07)
Australian Museum. Australian Museum provider for OZCAM. Record ID: 0e71c02e-2697-4195-b77b-84386ce294b2. Source: http://collections.ala.org.au/public/show/dr340 (source published on 2015-01-07)
Australian Museum. Australian Museum provider for OZCAM. Record ID: 34140efb-4c31-4d6a-9906-6bfe31de36a5. Source: http://collections.ala.org.au/public/show/dr340 (source published on 2015-01-07)
Australian Museum. Australian Museum provider for OZCAM. Record ID: 067d9398-606d-43f3-ae48-73069ba481bf. Source: http://collections.ala.org.au/public/show/dr340 (source published on 2015-01-07)
Australian Museum. Australian Museum provider for OZCAM. Record ID: 1b52bbdd-7983-441e-b8f9-3b429f5899f0. Source: http://collections.ala.org.au/public/show/dr340 (source published on 2015-01-07)
Australian Museum. Australian Museum provider for OZCAM. Record ID: 3975e179-00f7-44bc-bc3a-d7b6d98e9554. Source: http://collections.ala.org.au/public/show/dr340 (source published on 2015-01-07)
Australian Museum. Australian Museum provider for OZCAM. Record ID: 73e4cecf-1350-469a-8434-e92dee63493c. Source: http://collections.ala.org.au/public/show/dr340 (source published on 2015-01-07)
Australian Museum. Australian Museum provider for OZCAM. Record ID: f6803766-7bfd-472b-bf53-0b5d1d3da87b. Source: http://collections.ala.org.au/public/show/dr340 (source published on 2015-01-07)
Australian Museum. Australian Museum provider for OZCAM. Record ID: aca34074-838a-4b6a-9a4f-5dd885ec5a8f. Source: http://collections.ala.org.au/public/show/dr340 (source published on 2015-01-07)
Australian Museum. Australian Museum provider for OZCAM. Record ID: 549cbb6e-6f90-4018-af98-1d55d2c487a0. Source: http://collections.ala.org.au/public/show/dr340 (source published on 2015-01-07)
Australian Museum. Australian Museum provider for OZCAM. Record ID: c88e9cb5-96ea-4087-a53a-a5bf9caf16a4. Source: http://collections.ala.org.au/public/show/dr340 (source published on 2015-01-07)
Australian Museum. Australian Museum provider for OZCAM. Record ID: ad3a6755-d034-4daa-9af7-843a69ad71a4. Source: http://collections.ala.org.au/public/show/dr340 (source published on 2015-01-07)
Australian Museum. Australian Museum provider for OZCAM. Record ID: 825160b6-e96d-4e50-a900-deb9948184bc. Source: http://collections.ala.org.au/public/show/dr340 (source published on 2015-01-07)
Australian Museum. Australian Museum provider for OZCAM. Record ID: 884d0f8e-405d-4a53-b51a-49c687c914c8. Source: http://collections.ala.org.au/public/show/dr340 (source published on 2015-01-07)
Australian Museum. Australian Museum provider for OZCAM. Record ID: d45fcd5a-b45d-48c5-944f-6f60665ad5bb. Source: http://collections.ala.org.au/public/show/dr340 (source published on 2015-01-07)
Australian Museum. Australian Museum provider for OZCAM. Record ID: 7a993937-7aaf-4296-baac-39e55420e832. Source: http://collections.ala.org.au/public/show/dr340 (source published on 2015-01-07)
Australian Museum. Australian Museum provider for OZCAM. Record ID: 150b7c11-ac77-40c3-bcd5-4a286b2e1944. Source: http://collections.ala.org.au/public/show/dr340 (source published on 2015-01-07)
Australian Museum. Australian Museum provider for OZCAM. Record ID: af8727cb-742f-41e0-bccb-c0d9d03dc7d2. Source: http://collections.ala.org.au/public/show/dr340 (source published on 2015-01-07)
Australian Museum. Australian Museum provider for OZCAM. Record ID: fd7a672f-c1be-4e64-8399-c220adfd91f4. Source: http://collections.ala.org.au/public/show/dr340 (source published on 2015-01-07)
Australian Museum. Australian Museum provider for OZCAM. Record ID: f83ae235-6d13-4549-bcb1-09d09d8c05f1. Source: http://collections.ala.org.au/public/show/dr340 (source published on 2015-01-07)
Australian Museum. Australian Museum provider for OZCAM. Record ID: 15738b2d-9a97-40cd-9179-4e6e6997ff96. Source: http://collections.ala.org.au/public/show/dr340 (source published on 2015-01-07)
Australian Museum. Australian Museum provider for OZCAM. Record ID: db8221ed-a650-428b-acec-473b6dc66b69. Source: http://collections.ala.org.au/public/show/dr340 (source published on 2015-01-07)
Australian Museum. Australian Museum provider for OZCAM. Record ID: 2810754d-3279-4fe7-a730-64faf850a9a9. Source: http://collections.ala.org.au/public/show/dr340 (source published on 2015-01-07)
Australian Museum. Australian Museum provider for OZCAM. Record ID: 282fda80-678e-49db-bc56-6a78b06a8147. Source: http://collections.ala.org.au/public/show/dr340 (source published on 2015-01-07)
Australian Museum. Australian Museum provider for OZCAM. Record ID: 58c198e9-0a02-4a2a-bbaa-0c303eb8be71. Source: http://collections.ala.org.au/public/show/dr340 (source published on 2015-01-07)
Australian Museum. Australian Museum provider for OZCAM. Record ID: 28d935e9-56ec-453b-9ea9-48c6917b456a. Source: http://collections.ala.org.au/public/show/dr340 (source published on 2015-01-07)
Australian Museum. Australian Museum provider for OZCAM. Record ID: d2f4c3fb-e3ad-4e2b-a2de-654a7b052e8f. Source: http://collections.ala.org.au/public/show/dr340 (source published on 2015-01-07)
Australian Museum. Australian Museum provider for OZCAM. Record ID: ea23b731-d7e7-4959-a8f8-03e7f3c73042. Source: http://collections.ala.org.au/public/show/dr340 (source published on 2015-01-07)
Australian Museum. Australian Museum provider for OZCAM. Record ID: 1c764700-2d96-479e-8361-03e219600d31. Source: http://collections.ala.org.au/public/show/dr340 (source published on 2015-01-07)
Australian Museum. Australian Museum provider for OZCAM. Record ID: 31d31174-1755-438a-bd6f-0fce1e38ea10. Source: http://collections.ala.org.au/public/show/dr340 (source published on 2015-01-07)
Australian Museum. Australian Museum provider for OZCAM. Record ID: 7dd130e3-22f5-492e-97b2-9df746cf93cf. Source: http://collections.ala.org.au/public/show/dr340 (source published on 2015-01-07)
Australian Museum. Australian Museum provider for OZCAM. Record ID: 84515315-3751-4901-9e6c-efbfeb78353a. Source: http://collections.ala.org.au/public/show/dr340 (source published on 2015-01-07)
Australian Museum. Australian Museum provider for OZCAM. Record ID: c977d56f-d01a-4ca9-8f79-51d1b54f5caa. Source: http://collections.ala.org.au/public/show/dr340 (source published on 2015-01-07)
Australian Museum. Australian Museum provider for OZCAM. Record ID: f8da45a4-adf0-4262-95db-288f974739ff. Source: http://collections.ala.org.au/public/show/dr340 (source published on 2015-01-07)
Australian Museum. Australian Museum provider for OZCAM. Record ID: dd60a464-5572-48df-8ae6-9ca3a3d83245. Source: http://collections.ala.org.au/public/show/dr340 (source published on 2015-01-07)
Australian Museum. Australian Museum provider for OZCAM. Record ID: 95a3a3a3-a000-4dbd-aa7a-a5a9ca742463. Source: http://collections.ala.org.au/public/show/dr340 (source published on 2015-01-07)
Australian Museum. Australian Museum provider for OZCAM. Record ID: 2418ff91-1e22-481e-880d-6fe385370e1c. Source: http://collections.ala.org.au/public/show/dr340 (source published on 2015-01-07)
Australian Museum. Australian Museum provider for OZCAM. Record ID: 7ca26e16-62ed-4e89-b1d8-8c6ca4d61854. Source: http://collections.ala.org.au/public/show/dr340 (source published on 2015-01-07)
Australian Museum. Australian Museum provider for OZCAM. Record ID: 1bb861e2-8eab-4432-a84f-70930f5ff0a2. Source: http://collections.ala.org.au/public/show/dr340 (source published on 2015-01-07)
Australian Museum. Australian Museum provider for OZCAM. Record ID: a53f833b-6208-485b-ba96-b0eddbd36a0e. Source: http://collections.ala.org.au/public/show/dr340 (source published on 2015-01-07)
Australian Museum. Australian Museum provider for OZCAM. Record ID: 024051d0-0fae-4681-81fe-586eb4b89445. Source: http://collections.ala.org.au/public/show/dr340 (source published on 2015-01-07)
Australian Museum. Australian Museum provider for OZCAM. Record ID: 99821a01-0558-47f8-bf09-0b6626aa26a4. Source: http://collections.ala.org.au/public/show/dr340 (source published on 2015-01-07)
Australian Museum. Australian Museum provider for OZCAM. Record ID: b2ddd84e-75f5-4081-a6e0-9172d074373d. Source: http://collections.ala.org.au/public/show/dr340 (source published on 2015-01-07)
Australian Museum. Australian Museum provider for OZCAM. Record ID: a816dadb-d858-4813-85af-39f701e64ed7. Source: http://collections.ala.org.au/public/show/dr340 (source published on 2015-01-07)
Australian Museum. Australian Museum provider for OZCAM. Record ID: e0bcb92a-75a1-4aee-9e4d-d703d7254180. Source: http://collections.ala.org.au/public/show/dr340 (source published on 2015-01-07)
Australian Museum. Australian Museum provider for OZCAM. Record ID: dd437f86-dad0-4645-85de-53a36f7f7079. Source: http://collections.ala.org.au/public/show/dr340 (source published on 2015-01-07)
Australian Museum. Australian Museum provider for OZCAM. Record ID: 78a7f318-597f-40da-8040-7a16f9b4edba. Source: http://collections.ala.org.au/public/show/dr340 (source published on 2015-01-07)
Australian Museum. Australian Museum provider for OZCAM. Record ID: 3e196aaa-b31a-4ab1-926a-2e8adfa9db1d. Source: http://collections.ala.org.au/public/show/dr340 (source published on 2015-01-07)
Australian Museum. Australian Museum provider for OZCAM. Record ID: c22d738e-f43c-495b-b208-609eb30089a4. Source: http://collections.ala.org.au/public/show/dr340 (source published on 2015-01-07)
Australian Museum. Australian Museum provider for OZCAM. Record ID: 7bde5e08-2629-4d62-a2c7-591f1ba4ede4. Source: http://collections.ala.org.au/public/show/dr340 (source published on 2015-01-07)
Australian Museum. Australian Museum provider for OZCAM. Record ID: b8f8348b-d09e-4f61-b586-220fb672c776. Source: http://collections.ala.org.au/public/show/dr340 (source published on 2015-01-07)
Australian Museum. Australian Museum provider for OZCAM. Record ID: a76a977a-d678-43a7-b920-8683659da05e. Source: http://collections.ala.org.au/public/show/dr340 (source published on 2015-01-07)
Australian Museum. Australian Museum provider for OZCAM. Record ID: 4a8e5d79-7a09-4e9a-9d89-3277503b62a2. Source: http://collections.ala.org.au/public/show/dr340 (source published on 2015-01-07)
Australian Museum. Australian Museum provider for OZCAM. Record ID: c94b50f9-cfe7-498e-a346-394bf2b4c6fc. Source: http://collections.ala.org.au/public/show/dr340 (source published on 2015-01-07)
Australian Museum. Australian Museum provider for OZCAM. Record ID: d8621225-378e-4816-bf22-21af2a48cbc3. Source: http://collections.ala.org.au/public/show/dr340 (source published on 2015-01-07)
Australian Museum. Australian Museum provider for OZCAM. Record ID: 26293649-9ef3-4ba1-9fb1-8392a31fa56f. Source: http://collections.ala.org.au/public/show/dr340 (source published on 2015-01-07)
Australian Museum. Australian Museum provider for OZCAM. Record ID: d988e303-d00e-43b5-9907-d431c8ea56fd. Source: http://collections.ala.org.au/public/show/dr340 (source published on 2015-01-07)
Australian Museum. Australian Museum provider for OZCAM. Record ID: a8cbe209-64e0-45c5-97cc-c1b11ca964e7. Source: http://collections.ala.org.au/public/show/dr340 (source published on 2015-01-07)
Australian Museum. Australian Museum provider for OZCAM. Record ID: 1f14d539-8d18-459c-804c-55ada61d6a02. Source: http://collections.ala.org.au/public/show/dr340 (source published on 2015-01-07)
Australian Museum. Australian Museum provider for OZCAM. Record ID: ffd2548b-6bc0-4a31-98ab-da7e44af85fc. Source: http://collections.ala.org.au/public/show/dr340 (source published on 2015-01-07)
Australian Museum. Australian Museum provider for OZCAM. Record ID: 05b78efe-84f8-4066-b4e3-b9d904fc4de8. Source: http://collections.ala.org.au/public/show/dr340 (source published on 2015-01-07)
Australian Museum. Australian Museum provider for OZCAM. Record ID: e4dce98c-7d72-4d5d-a904-c7bdde4f0392. Source: http://collections.ala.org.au/public/show/dr340 (source published on 2015-01-07)
Australian Museum. Australian Museum provider for OZCAM. Record ID: 5a3bba00-e19c-4cfc-9a61-72a403c084c8. Source: http://collections.ala.org.au/public/show/dr340 (source published on 2015-01-07)
Australian Museum. Australian Museum provider for OZCAM. Record ID: 73ed87dc-664d-4c60-b365-65531e6235dc. Source: http://collections.ala.org.au/public/show/dr340 (source published on 2015-01-07)
Australian Museum. Australian Museum provider for OZCAM. Record ID: a08cb11a-1629-4ec6-9db9-8940cf813fbb. Source: http://collections.ala.org.au/public/show/dr340 (source published on 2015-01-07)
Australian Museum. Australian Museum provider for OZCAM. Record ID: 6eabecfb-40c0-4e03-9af9-8ef0d9d6edd8. Source: http://collections.ala.org.au/public/show/dr340 (source published on 2015-01-07)
Australian Museum. Australian Museum provider for OZCAM. Record ID: 9ce04b3d-1d0b-4ad7-be0c-61b946550881. Source: http://collections.ala.org.au/public/show/dr340 (source published on 2015-01-07)
Australian Museum. Australian Museum provider for OZCAM. Record ID: 6d5a145b-802e-499e-b4a3-e6142e9062fe. Source: http://collections.ala.org.au/public/show/dr340 (source published on 2015-01-07)
Australian Museum. Australian Museum provider for OZCAM. Record ID: 70b32b5a-50a9-4a3c-aac0-f4bed951c73f. Source: http://collections.ala.org.au/public/show/dr340 (source published on 2015-01-07)
Australian Museum. Australian Museum provider for OZCAM. Record ID: f50703d8-32da-451e-b56f-2cf8ed821113. Source: http://collections.ala.org.au/public/show/dr340 (source published on 2015-01-07)
Australian Museum. Australian Museum provider for OZCAM. Record ID: 757291a3-0aba-4303-9c13-797258513e9e. Source: http://collections.ala.org.au/public/show/dr340 (source published on 2015-01-07)
Australian Museum. Australian Museum provider for OZCAM. Record ID: 8d001421-c246-499b-b031-b85bd2da575b. Source: http://collections.ala.org.au/public/show/dr340 (source published on 2015-01-07)
Australian Museum. Australian Museum provider for OZCAM. Record ID: e9c8046b-b59d-4ad8-9d37-cb4ae2141f0e. Source: http://collections.ala.org.au/public/show/dr340 (source published on 2015-01-07)
Australian Museum. Australian Museum provider for OZCAM. Record ID: 1940ad9f-0549-488c-95b3-0a5d47b62fd3. Source: http://collections.ala.org.au/public/show/dr340 (source published on 2015-01-07)
Australian Museum. Australian Museum provider for OZCAM. Record ID: c67ee435-33ab-4c8e-8b98-d4deb43533a9. Source: http://collections.ala.org.au/public/show/dr340 (source published on 2015-01-07)
Australian Museum. Australian Museum provider for OZCAM. Record ID: df938dce-8071-4200-b0cd-c4cac84a7bf4. Source: http://collections.ala.org.au/public/show/dr340 (source published on 2015-01-07)
Australian Museum. Australian Museum provider for OZCAM. Record ID: b8cf07b1-1ae8-4c4c-9544-938383626739. Source: http://collections.ala.org.au/public/show/dr340 (source published on 2015-01-07)
Australian Museum. Australian Museum provider for OZCAM. Record ID: 4853e206-f1f7-45c8-8c84-4ebec7e45d82. Source: http://collections.ala.org.au/public/show/dr340 (source published on 2015-01-07)
Australian Museum. Australian Museum provider for OZCAM. Record ID: e780390f-2f13-4749-87ac-fb565689c7c5. Source: http://collections.ala.org.au/public/show/dr340 (source published on 2015-01-07)
Australian Museum. Australian Museum provider for OZCAM. Record ID: 5f38be35-2327-4299-aa77-bedbb3496fda. Source: http://collections.ala.org.au/public/show/dr340 (source published on 2015-01-07)
Australian Museum. Australian Museum provider for OZCAM. Record ID: 7407ad8d-b8fe-482d-9e28-698712739a50. Source: http://collections.ala.org.au/public/show/dr340 (source published on 2015-01-07)
Australian Museum. Australian Museum provider for OZCAM. Record ID: 3e0f5014-df9c-4c8e-8fb4-8bf34f54eeed. Source: http://collections.ala.org.au/public/show/dr340 (source published on 2015-01-07)
Australian Museum. Australian Museum provider for OZCAM. Record ID: dc2d64b2-eb7d-44f6-8011-b055b408165c. Source: http://collections.ala.org.au/public/show/dr340 (source published on 2015-01-07)
Australian Museum. Australian Museum provider for OZCAM. Record ID: a15a9510-3cac-49dc-975c-4ca75e03337a. Source: http://collections.ala.org.au/public/show/dr340 (source published on 2015-01-07)
Australian Museum. Australian Museum provider for OZCAM. Record ID: c60bfce3-b7e9-4f15-93ef-88f1d6454f23. Source: http://collections.ala.org.au/public/show/dr340 (source published on 2015-01-07)
Australian Museum. Australian Museum provider for OZCAM. Record ID: a5bfb847-a8e3-475b-abba-502a9da3e9fd. Source: http://collections.ala.org.au/public/show/dr340 (source published on 2015-01-07)
Australian Museum. Australian Museum provider for OZCAM. Record ID: 883b15b3-214e-42d9-ad87-eb5db0d5619e. Source: http://collections.ala.org.au/public/show/dr340 (source published on 2015-01-07)
Australian Museum. Australian Museum provider for OZCAM. Record ID: eb711144-18de-4838-a241-9bf15196e024. Source: http://collections.ala.org.au/public/show/dr340 (source published on 2015-01-07)
Australian Museum. Australian Museum provider for OZCAM. Record ID: 47fdb849-9c32-4982-8b29-aaa9c7ef6b53. Source: http://collections.ala.org.au/public/show/dr340 (source published on 2015-01-07)
Australian Museum. Australian Museum provider for OZCAM. Record ID: c748d23f-feb8-4588-be09-327facf41af4. Source: http://collections.ala.org.au/public/show/dr340 (source published on 2015-01-07)
Australian Museum. Australian Museum provider for OZCAM. Record ID: 0c882aa5-4c28-44ea-a175-64b50f9b1ae0. Source: http://collections.ala.org.au/public/show/dr340 (source published on 2015-01-07)
Australian Museum. Australian Museum provider for OZCAM. Record ID: 5fa9b8ad-3278-4bf9-962b-ebe86abcb045. Source: http://collections.ala.org.au/public/show/dr340 (source published on 2015-01-07)
Australian Museum. Australian Museum provider for OZCAM. Record ID: 1b003d33-5330-4696-88fd-c734c5784b30. Source: http://collections.ala.org.au/public/show/dr340 (source published on 2015-01-07)
Australian Museum. Australian Museum provider for OZCAM. Record ID: ec69f0fc-e7c4-496e-8494-84a2a75d5bd6. Source: http://collections.ala.org.au/public/show/dr340 (source published on 2015-01-07)
Australian Museum. Australian Museum provider for OZCAM. Record ID: b27a806b-dba7-45bc-b421-225d38e2d90c. Source: http://collections.ala.org.au/public/show/dr340 (source published on 2015-01-07)
Australian Museum. Australian Museum provider for OZCAM. Record ID: 8fe76571-a539-48fa-bfda-6d0a4fc2fa01. Source: http://collections.ala.org.au/public/show/dr340 (source published on 2015-01-07)
Australian Museum. Australian Museum provider for OZCAM. Record ID: 7cc2609c-4f12-41cd-98b4-35fc9d311336. Source: http://collections.ala.org.au/public/show/dr340 (source published on 2015-01-07)
Australian Museum. Australian Museum provider for OZCAM. Record ID: a5ec99d1-e273-4f20-aea6-d0fb1724047c. Source: http://collections.ala.org.au/public/show/dr340 (source published on 2015-01-07)
Australian Museum. Australian Museum provider for OZCAM. Record ID: 49cbaeb9-d00a-4368-ba8a-5cd6cc09204e. Source: http://collections.ala.org.au/public/show/dr340 (source published on 2015-01-07)
Australian Museum. Australian Museum provider for OZCAM. Record ID: 2a4394b3-00cd-4766-a885-2744839894cd. Source: http://collections.ala.org.au/public/show/dr340 (source published on 2015-01-07)
Australian Museum. Australian Museum provider for OZCAM. Record ID: ab890abb-b3f8-4ecc-9974-5b3dcca78ace. Source: http://collections.ala.org.au/public/show/dr340 (source published on 2015-01-07)
Australian Museum. Australian Museum provider for OZCAM. Record ID: c01ebfa1-d9c7-49fb-8eea-3ed491fb9332. Source: http://collections.ala.org.au/public/show/dr340 (source published on 2015-01-07)
Australian Museum. Australian Museum provider for OZCAM. Record ID: db80a96f-b1b0-4489-8426-a546471b05c7. Source: http://collections.ala.org.au/public/show/dr340 (source published on 2015-01-07)
Australian Museum. Australian Museum provider for OZCAM. Record ID: d0e1a1eb-3721-4b34-bd1a-2b91b755734a. Source: http://collections.ala.org.au/public/show/dr340 (source published on 2015-01-07)
Australian Museum. Australian Museum provider for OZCAM. Record ID: ec08ca6e-5aae-48b7-aeec-c3527bad7c12. Source: http://collections.ala.org.au/public/show/dr340 (source published on 2015-01-07)
Australian Museum. Australian Museum provider for OZCAM. Record ID: a82500ee-1110-4566-94a6-2083bde63e68. Source: http://collections.ala.org.au/public/show/dr340 (source published on 2015-01-07)
Australian Museum. Australian Museum provider for OZCAM. Record ID: e8c44b35-b622-40f2-8f8c-459488475cee. Source: http://collections.ala.org.au/public/show/dr340 (source published on 2015-01-07)
Australian Museum. Australian Museum provider for OZCAM. Record ID: 8772cc80-9c08-4722-a930-580a21744613. Source: http://collections.ala.org.au/public/show/dr340 (source published on 2015-01-07)
Australian Museum. Australian Museum provider for OZCAM. Record ID: a92666e1-8af9-4e77-91f1-18857bfb8907. Source: http://collections.ala.org.au/public/show/dr340 (source published on 2015-01-07)
Australian Museum. Australian Museum provider for OZCAM. Record ID: 48f1900e-5818-4536-bccb-18e1c2f5fee7. Source: http://collections.ala.org.au/public/show/dr340 (source published on 2015-01-07)
Australian Museum. Australian Museum provider for OZCAM. Record ID: 3136a0d6-fb63-4dae-b56c-3f85fd3d6d27. Source: http://collections.ala.org.au/public/show/dr340 (source published on 2015-01-07)
Australian Museum. Australian Museum provider for OZCAM. Record ID: 0a484bc2-1fa0-4a66-b4ff-ac7845230305. Source: http://collections.ala.org.au/public/show/dr340 (source published on 2015-01-07)
Australian Museum. Australian Museum provider for OZCAM. Record ID: 47b37d54-687c-473c-9d48-873ce01eab34. Source: http://collections.ala.org.au/public/show/dr340 (source published on 2015-01-07)
Australian Museum. Australian Museum provider for OZCAM. Record ID: 47236911-85d4-44f4-a1a5-9c12d3de7796. Source: http://collections.ala.org.au/public/show/dr340 (source published on 2015-01-07)
Australian Museum. Australian Museum provider for OZCAM. Record ID: 47d4d9fd-d144-4619-a8ca-e9381487fc2e. Source: http://collections.ala.org.au/public/show/dr340 (source published on 2015-01-07)
Australian Museum. Australian Museum provider for OZCAM. Record ID: 2127b5d5-d84a-47b6-b681-0e3d3b312c2b. Source: http://collections.ala.org.au/public/show/dr340 (source published on 2015-01-07)
Australian Museum. Australian Museum provider for OZCAM. Record ID: 2b996e29-eb6a-4343-af1d-670e898c3893. Source: http://collections.ala.org.au/public/show/dr340 (source published on 2015-01-07)
Australian Museum. Australian Museum provider for OZCAM. Record ID: 5a7cd4a8-f10e-4791-a321-12b5c7546203. Source: http://collections.ala.org.au/public/show/dr340 (source published on 2015-01-07)
Australian Museum. Australian Museum provider for OZCAM. Record ID: 39034173-ecc0-4033-a6d9-30ba4f883848. Source: http://collections.ala.org.au/public/show/dr340 (source published on 2015-01-07)
Australian Museum. Australian Museum provider for OZCAM. Record ID: 6fcafee0-6436-45e0-a800-77d957d6531f. Source: http://collections.ala.org.au/public/show/dr340 (source published on 2015-01-07)
Australian Museum. Australian Museum provider for OZCAM. Record ID: 94c8d1bc-f9b2-4836-98d9-44baaf0c3f87. Source: http://collections.ala.org.au/public/show/dr340 (source published on 2015-01-07)
Australian Museum. Australian Museum provider for OZCAM. Record ID: f68b1cad-0be8-4f71-8ed0-a51a15ccdbf6. Source: http://collections.ala.org.au/public/show/dr340 (source published on 2015-01-07)
Australian Museum. Australian Museum provider for OZCAM. Record ID: 6146a57f-a843-40e1-b51e-9590f7faa815. Source: http://collections.ala.org.au/public/show/dr340 (source published on 2015-01-07)
Australian Museum. Australian Museum provider for OZCAM. Record ID: 85c6f3bc-49e3-4805-b887-2e0e0bc811ff. Source: http://collections.ala.org.au/public/show/dr340 (source published on 2015-01-07)
Australian Museum. Australian Museum provider for OZCAM. Record ID: 1e631c5b-c9ca-4665-aa22-74c65266de2c. Source: http://collections.ala.org.au/public/show/dr340 (source published on 2015-01-07)
Australian Museum. Australian Museum provider for OZCAM. Record ID: ab1d20bc-c741-45dd-8105-3636313589b2. Source: http://collections.ala.org.au/public/show/dr340 (source published on 2015-01-07)
Australian Museum. Australian Museum provider for OZCAM. Record ID: ae6b31bf-9cb5-4657-98ae-9f4c5ce1f9f7. Source: http://collections.ala.org.au/public/show/dr340 (source published on 2015-01-07)
Australian Museum. Australian Museum provider for OZCAM. Record ID: 4036fb07-a13c-42da-ae08-b3edde32938b. Source: http://collections.ala.org.au/public/show/dr340 (source published on 2015-01-07)
Australian Museum. Australian Museum provider for OZCAM. Record ID: 815716f6-8010-4ec5-9d9c-fcd378726c11. Source: http://collections.ala.org.au/public/show/dr340 (source published on 2015-01-07)
Australian Museum. Australian Museum provider for OZCAM. Record ID: f2726ae1-7201-47a1-8b1e-2770736fd4a5. Source: http://collections.ala.org.au/public/show/dr340 (source published on 2015-01-07)
Australian Museum. Australian Museum provider for OZCAM. Record ID: c1ed0b46-3fb4-477b-8caf-be3f8c4ed562. Source: http://collections.ala.org.au/public/show/dr340 (source published on 2015-01-07)
Australian Museum. Australian Museum provider for OZCAM. Record ID: d53f74fa-bde2-437d-a396-369c66ccada5. Source: http://collections.ala.org.au/public/show/dr340 (source published on 2015-01-07)
Australian Museum. Australian Museum provider for OZCAM. Record ID: d5211174-3d76-4d5e-aa33-df061d8d6778. Source: http://collections.ala.org.au/public/show/dr340 (source published on 2015-01-07)
Australian Museum. Australian Museum provider for OZCAM. Record ID: 8e4ac296-927c-44bb-8765-c7f31db7df55. Source: http://collections.ala.org.au/public/show/dr340 (source published on 2015-01-07)
Australian Museum. Australian Museum provider for OZCAM. Record ID: 2cfa4b8a-7580-4dd2-8ac1-44b6d4eca920. Source: http://collections.ala.org.au/public/show/dr340 (source published on 2015-01-07)
Australian Museum. Australian Museum provider for OZCAM. Record ID: 50b02706-0ef4-4d3f-ae72-71a02a75c850. Source: http://collections.ala.org.au/public/show/dr340 (source published on 2015-01-07)
Australian Museum. Australian Museum provider for OZCAM. Record ID: be8afc43-662c-49be-87bb-606ffcd1d260. Source: http://collections.ala.org.au/public/show/dr340 (source published on 2015-01-07)
Australian Museum. Australian Museum provider for OZCAM. Record ID: 0eeda348-8baf-4d14-82be-6dcc8f147035. Source: http://collections.ala.org.au/public/show/dr340 (source published on 2015-01-07)
Australian Museum. Australian Museum provider for OZCAM. Record ID: 3e913603-8d09-4db1-bbe9-5ae3c057af94. Source: http://collections.ala.org.au/public/show/dr340 (source published on 2015-01-07)
Australian Museum. Australian Museum provider for OZCAM. Record ID: 436f389b-d353-4566-905d-95102f046a8e. Source: http://collections.ala.org.au/public/show/dr340 (source published on 2015-01-07)
Australian Museum. Australian Museum provider for OZCAM. Record ID: 9fdcbbc9-671f-46a5-83df-5a8b79b279b6. Source: http://collections.ala.org.au/public/show/dr340 (source published on 2015-01-07)
Australian Museum. Australian Museum provider for OZCAM. Record ID: 0097edb6-4269-42a9-a9c9-fce6ed03f816. Source: http://collections.ala.org.au/public/show/dr340 (source published on 2015-01-07)
Australian Museum. Australian Museum provider for OZCAM. Record ID: 3ad69bb4-2fd2-4de7-a7e7-61b18bbde5d2. Source: http://collections.ala.org.au/public/show/dr340 (source published on 2015-01-07)
Australian Museum. Australian Museum provider for OZCAM. Record ID: 7219c700-e3f9-49b3-9662-e2723b912f5b. Source: http://collections.ala.org.au/public/show/dr340 (source published on 2015-01-07)
Australian Museum. Australian Museum provider for OZCAM. Record ID: 064febcb-5326-44a1-a552-cf2fe0301e88. Source: http://collections.ala.org.au/public/show/dr340 (source published on 2015-01-07)
Australian Museum. Australian Museum provider for OZCAM. Record ID: 207c3f94-5d2c-4062-9570-d3872e81fa50. Source: http://collections.ala.org.au/public/show/dr340 (source published on 2015-01-07)
Australian Museum. Australian Museum provider for OZCAM. Record ID: 807e3bbf-1772-45cc-81da-925284843ee0. Source: http://collections.ala.org.au/public/show/dr340 (source published on 2015-01-07)
Australian Museum. Australian Museum provider for OZCAM. Record ID: 2bc3fe9f-594f-4def-a6ee-8cf42f568d01. Source: http://collections.ala.org.au/public/show/dr340 (source published on 2015-01-07)
Australian Museum. Australian Museum provider for OZCAM. Record ID: 338b4d97-d35f-4532-bc5f-e98de34bb32f. Source: http://collections.ala.org.au/public/show/dr340 (source published on 2015-01-07)
Australian Museum. Australian Museum provider for OZCAM. Record ID: e3e03a88-1d9d-45ee-a77f-00ca7194d8f2. Source: http://collections.ala.org.au/public/show/dr340 (source published on 2015-01-07)
Australian Museum. Australian Museum provider for OZCAM. Record ID: 7dc947e2-9562-4653-8bc3-ef938c3640ad. Source: http://collections.ala.org.au/public/show/dr340 (source published on 2015-01-07)
Australian Museum. Australian Museum provider for OZCAM. Record ID: 109aec88-34a7-4db6-888a-56f0bedd864d. Source: http://collections.ala.org.au/public/show/dr340 (source published on 2015-01-07)
Australian Museum. Australian Museum provider for OZCAM. Record ID: f9803485-aab6-4367-8988-47d8277fd95b. Source: http://collections.ala.org.au/public/show/dr340 (source published on 2015-01-07)
Australian Museum. Australian Museum provider for OZCAM. Record ID: 63e3dd40-f9d7-49ac-953f-6275dbbc5f8f. Source: http://collections.ala.org.au/public/show/dr340 (source published on 2015-01-07)
Australian Museum. Australian Museum provider for OZCAM. Record ID: 3c8a71b8-1041-4172-8eb7-ff6a33cbc7a0. Source: http://collections.ala.org.au/public/show/dr340 (source published on 2015-01-07)
Australian Museum. Australian Museum provider for OZCAM. Record ID: b5cecb12-acde-488f-8b43-789742b99185. Source: http://collections.ala.org.au/public/show/dr340 (source published on 2015-01-07)
Australian Museum. Australian Museum provider for OZCAM. Record ID: 86a2119d-ab66-430d-bc4f-eaebb2f0bebb. Source: http://collections.ala.org.au/public/show/dr340 (source published on 2015-01-07)
Australian Museum. Australian Museum provider for OZCAM. Record ID: 028181b4-65ea-483a-b04e-7dde83dfd26e. Source: http://collections.ala.org.au/public/show/dr340 (source published on 2015-01-07)
Australian Museum. Australian Museum provider for OZCAM. Record ID: 54091eb6-a79d-40af-9f96-1e8e36b5168d. Source: http://collections.ala.org.au/public/show/dr340 (source published on 2015-01-07)
Australian Museum. Australian Museum provider for OZCAM. Record ID: 2c6b0831-c8f1-41f6-af04-7e39a21daa08. Source: http://collections.ala.org.au/public/show/dr340 (source published on 2015-01-07)
Australian Museum. Australian Museum provider for OZCAM. Record ID: 07a22228-6718-463a-a695-b950393bf45e. Source: http://collections.ala.org.au/public/show/dr340 (source published on 2015-01-07)
Australian Museum. Australian Museum provider for OZCAM. Record ID: 8c5f5061-20cc-4174-abd6-6d630a162740. Source: http://collections.ala.org.au/public/show/dr340 (source published on 2015-01-07)
Australian Museum. Australian Museum provider for OZCAM. Record ID: 10045042-90a1-4e6e-8e9a-1956c6c6d8ca. Source: http://collections.ala.org.au/public/show/dr340 (source published on 2015-01-07)
Australian Museum. Australian Museum provider for OZCAM. Record ID: c9ff7d8c-46ff-4e9d-9ed7-ec612a2fd74f. Source: http://collections.ala.org.au/public/show/dr340 (source published on 2015-01-07)
Australian Museum. Australian Museum provider for OZCAM. Record ID: 6d760a3e-b016-4361-b20e-e905a0c94100. Source: http://collections.ala.org.au/public/show/dr340 (source published on 2015-01-07)
Australian Museum. Australian Museum provider for OZCAM. Record ID: 0a15d4a0-6a02-43f0-a048-b427dd641949. Source: http://collections.ala.org.au/public/show/dr340 (source published on 2015-01-07)
Australian Museum. Australian Museum provider for OZCAM. Record ID: d4ada60e-ad0b-4386-b9a7-b4cc59051fa6. Source: http://collections.ala.org.au/public/show/dr340 (source published on 2015-01-07)
Australian Museum. Australian Museum provider for OZCAM. Record ID: 74ba94c5-6446-4a47-b1d7-4780a5fd1a85. Source: http://collections.ala.org.au/public/show/dr340 (source published on 2015-01-07)
Australian Museum. Australian Museum provider for OZCAM. Record ID: 04ef6bb1-569a-446b-8ee0-2e7f1ff0b876. Source: http://collections.ala.org.au/public/show/dr340 (source published on 2015-01-07)
Australian Museum. Australian Museum provider for OZCAM. Record ID: 988c1037-d56a-4a23-8120-dd4f13da749b. Source: http://collections.ala.org.au/public/show/dr340 (source published on 2015-01-07)
Australian Museum. Australian Museum provider for OZCAM. Record ID: a410ad86-c743-44fa-924d-d188a1eec9ae. Source: http://collections.ala.org.au/public/show/dr340 (source published on 2015-01-07)
Australian Museum. Australian Museum provider for OZCAM. Record ID: 5f4c490b-dceb-464c-a88c-cc150699140d. Source: http://collections.ala.org.au/public/show/dr340 (source published on 2015-01-07)
Australian Museum. Australian Museum provider for OZCAM. Record ID: ba7ef9d6-2235-41d1-a489-75716a542c18. Source: http://collections.ala.org.au/public/show/dr340 (source published on 2015-01-07)
Australian Museum. Australian Museum provider for OZCAM. Record ID: c05fccf3-279a-46d4-9318-88d16e49beb8. Source: http://collections.ala.org.au/public/show/dr340 (source published on 2015-01-07)
Australian Museum. Australian Museum provider for OZCAM. Record ID: b3a71ddb-e26b-4a01-ad67-7b94876604ff. Source: http://collections.ala.org.au/public/show/dr340 (source published on 2015-01-07)
Australian Museum. Australian Museum provider for OZCAM. Record ID: 29ab27b7-810a-4d39-9dc6-aa012d080d17. Source: http://collections.ala.org.au/public/show/dr340 (source published on 2015-01-07)
Australian Museum. Australian Museum provider for OZCAM. Record ID: d25d6360-3352-49a0-8c2e-b71f8b19d28e. Source: http://collections.ala.org.au/public/show/dr340 (source published on 2015-01-07)
Australian Museum. Australian Museum provider for OZCAM. Record ID: 3af112b0-c3a5-44d4-b82a-2abd87fdfb3e. Source: http://collections.ala.org.au/public/show/dr340 (source published on 2015-01-07)
Australian Museum. Australian Museum provider for OZCAM. Record ID: cf632ea5-6201-4d88-9589-7806cdbf51d4. Source: http://collections.ala.org.au/public/show/dr340 (source published on 2015-01-07)
Australian Museum. Australian Museum provider for OZCAM. Record ID: 49a7961b-6f12-4f2e-bcca-a65a2605150f. Source: http://collections.ala.org.au/public/show/dr340 (source published on 2015-01-07)
Australian Museum. Australian Museum provider for OZCAM. Record ID: d0f98c85-2438-47a9-b698-a5bf7a68ea1f. Source: http://collections.ala.org.au/public/show/dr340 (source published on 2015-01-07)
Australian Museum. Australian Museum provider for OZCAM. Record ID: 57f93bf3-9de3-4c32-a027-159fbc145099. Source: http://collections.ala.org.au/public/show/dr340 (source published on 2015-01-07)
Australian Museum. Australian Museum provider for OZCAM. Record ID: 63df2fa3-6452-4bc3-ac93-4eafaddaeb30. Source: http://collections.ala.org.au/public/show/dr340 (source published on 2015-01-07)
Australian Museum. Australian Museum provider for OZCAM. Record ID: caac4d2e-8708-4116-a1e0-5121e44e9849. Source: http://collections.ala.org.au/public/show/dr340 (source published on 2015-01-07)
Australian Museum. Australian Museum provider for OZCAM. Record ID: 8001e1a3-fe18-4797-8155-05ba5f801479. Source: http://collections.ala.org.au/public/show/dr340 (source published on 2015-01-07)
Australian Museum. Australian Museum provider for OZCAM. Record ID: 4769d2df-cfc9-44f9-80fd-8ee1bb19d867. Source: http://collections.ala.org.au/public/show/dr340 (source published on 2015-01-07)
Australian Museum. Australian Museum provider for OZCAM. Record ID: 6b41b8cf-2e31-4bf0-a07f-c263a5598833. Source: http://collections.ala.org.au/public/show/dr340 (source published on 2015-01-07)
Australian Museum. Australian Museum provider for OZCAM. Record ID: 82e4c4fb-e9fa-43df-8f39-c1853f06ed91. Source: http://collections.ala.org.au/public/show/dr340 (source published on 2015-01-07)
Australian Museum. Australian Museum provider for OZCAM. Record ID: 268d804a-bf6c-42e3-b12a-70ef4baaa413. Source: http://collections.ala.org.au/public/show/dr340 (source published on 2015-01-07)
Australian Museum. Australian Museum provider for OZCAM. Record ID: 67075ebb-c97e-4ea5-9242-150a14e6660b. Source: http://collections.ala.org.au/public/show/dr340 (source published on 2015-01-07)
Australian Museum. Australian Museum provider for OZCAM. Record ID: 6c731d68-f8fa-42d0-b48b-96e8d57a3b19. Source: http://collections.ala.org.au/public/show/dr340 (source published on 2015-01-07)
Australian Museum. Australian Museum provider for OZCAM. Record ID: 7c3f7bd4-23c2-4859-9783-5948c99475e7. Source: http://collections.ala.org.au/public/show/dr340 (source published on 2015-01-07)
Australian Museum. Australian Museum provider for OZCAM. Record ID: ba6760a1-4dea-457b-a171-71dc7167b1fe. Source: http://collections.ala.org.au/public/show/dr340 (source published on 2015-01-07)
Australian Museum. Australian Museum provider for OZCAM. Record ID: bbeafaef-52d4-482f-b10b-b23900f41d4c. Source: http://collections.ala.org.au/public/show/dr340 (source published on 2015-01-07)
Australian Museum. Australian Museum provider for OZCAM. Record ID: c987c5f8-d7d5-4bb5-bbdf-832c8414c7b5. Source: http://collections.ala.org.au/public/show/dr340 (source published on 2015-01-07)
Australian Museum. Australian Museum provider for OZCAM. Record ID: 94cab665-e53b-4862-bc33-c098b0bc4f1c. Source: http://collections.ala.org.au/public/show/dr340 (source published on 2015-01-07)
Australian Museum. Australian Museum provider for OZCAM. Record ID: feb8c8db-27f4-4547-92c4-016a4241ad9f. Source: http://collections.ala.org.au/public/show/dr340 (source published on 2015-01-07)
Australian Museum. Australian Museum provider for OZCAM. Record ID: 8188bafd-33d0-4c60-8256-b7d7733ee680. Source: http://collections.ala.org.au/public/show/dr340 (source published on 2015-01-07)
Australian Museum. Australian Museum provider for OZCAM. Record ID: 0ff44225-bd61-4a45-9005-ad48181f3676. Source: http://collections.ala.org.au/public/show/dr340 (source published on 2015-01-07)
Australian Museum. Australian Museum provider for OZCAM. Record ID: 2556fc97-5f74-4900-ab77-9567535d31ae. Source: http://collections.ala.org.au/public/show/dr340 (source published on 2015-01-07)
Australian Museum. Australian Museum provider for OZCAM. Record ID: 3b39e60c-e2d3-486a-8937-1613fbee2dd1. Source: http://collections.ala.org.au/public/show/dr340 (source published on 2015-01-07)
Australian Museum. Australian Museum provider for OZCAM. Record ID: 65f6e45c-ef1f-4d79-a440-3d45119c38a1. Source: http://collections.ala.org.au/public/show/dr340 (source published on 2015-01-07)
Australian Museum. Australian Museum provider for OZCAM. Record ID: 79597c1f-2e61-4064-a767-efcf16149f17. Source: http://collections.ala.org.au/public/show/dr340 (source published on 2015-01-07)
Australian Museum. Australian Museum provider for OZCAM. Record ID: c7bdd305-9bfc-49bc-a8d0-91b65621e332. Source: http://collections.ala.org.au/public/show/dr340 (source published on 2015-01-07)
Australian Museum. Australian Museum provider for OZCAM. Record ID: de665df6-5d99-4fe8-9555-9c1ebe6fafae. Source: http://collections.ala.org.au/public/show/dr340 (source published on 2015-01-07)
Australian Museum. Australian Museum provider for OZCAM. Record ID: 7357af5f-d8f3-41c4-b075-f985745e261d. Source: http://collections.ala.org.au/public/show/dr340 (source published on 2015-01-07)
Australian Museum. Australian Museum provider for OZCAM. Record ID: e6b25c8a-8839-4a4c-9402-b95458c7d6b5. Source: http://collections.ala.org.au/public/show/dr340 (source published on 2015-01-07)
Australian Museum. Australian Museum provider for OZCAM. Record ID: cdbbc9e2-7d5b-4c8c-a379-2eae1954d4b9. Source: http://collections.ala.org.au/public/show/dr340 (source published on 2015-01-07)
Australian Museum. Australian Museum provider for OZCAM. Record ID: bc18e508-a699-43d3-880e-dc62d53bd130. Source: http://collections.ala.org.au/public/show/dr340 (source published on 2015-01-07)
Australian Museum. Australian Museum provider for OZCAM. Record ID: 96e8812e-f047-4782-b52f-400fed76e750. Source: http://collections.ala.org.au/public/show/dr340 (source published on 2015-01-07)
Australian Museum. Australian Museum provider for OZCAM. Record ID: b3bdd822-f4aa-408a-bb70-1c8816e42e80. Source: http://collections.ala.org.au/public/show/dr340 (source published on 2015-01-07)
Australian Museum. Australian Museum provider for OZCAM. Record ID: 6687cce6-dd62-4ba9-92f9-91b29ce4a40c. Source: http://collections.ala.org.au/public/show/dr340 (source published on 2015-01-07)
Australian Museum. Australian Museum provider for OZCAM. Record ID: 6a752650-3dfc-4bd0-a7c2-12fa10aef8f0. Source: http://collections.ala.org.au/public/show/dr340 (source published on 2015-01-07)
Australian Museum. Australian Museum provider for OZCAM. Record ID: 05f75e91-5cdb-4dc9-ad6f-036d2bc770ef. Source: http://collections.ala.org.au/public/show/dr340 (source published on 2015-01-07)
Australian Museum. Australian Museum provider for OZCAM. Record ID: bfa98236-cbda-4f59-b0c3-c842bea1ae06. Source: http://collections.ala.org.au/public/show/dr340 (source published on 2015-01-07)
Australian Museum. Australian Museum provider for OZCAM. Record ID: 4ac736ce-b3f8-4686-9e96-70e584b2916e. Source: http://collections.ala.org.au/public/show/dr340 (source published on 2015-01-07)
Australian Museum. Australian Museum provider for OZCAM. Record ID: 5d39bee2-3a16-4c8b-aba9-81fe258d9501. Source: http://collections.ala.org.au/public/show/dr340 (source published on 2015-01-07)
Australian Museum. Australian Museum provider for OZCAM. Record ID: 5ec3448a-c1ad-48fd-accf-e8e763a595a2. Source: http://collections.ala.org.au/public/show/dr340 (source published on 2015-01-07)
Australian Museum. Australian Museum provider for OZCAM. Record ID: 532d3c67-5cac-4b87-9402-4c71f081dd9d. Source: http://collections.ala.org.au/public/show/dr340 (source published on 2015-01-07)
Australian Museum. Australian Museum provider for OZCAM. Record ID: 4e6ba481-a27d-46cc-a48f-cd8d77f7153b. Source: http://collections.ala.org.au/public/show/dr340 (source published on 2015-01-07)
Australian Museum. Australian Museum provider for OZCAM. Record ID: bbfe5421-0557-4d11-aead-4f1cd08196d6. Source: http://collections.ala.org.au/public/show/dr340 (source published on 2015-01-07)
Australian Museum. Australian Museum provider for OZCAM. Record ID: 67474493-494f-4cc0-968e-797e28c7b2dd. Source: http://collections.ala.org.au/public/show/dr340 (source published on 2015-01-07)
Australian Museum. Australian Museum provider for OZCAM. Record ID: 41cf1092-b12b-4416-b305-f1ecf9ed1751. Source: http://collections.ala.org.au/public/show/dr340 (source published on 2015-01-07)
Australian Museum. Australian Museum provider for OZCAM. Record ID: a90462de-81e6-46da-9c73-317249e94576. Source: http://collections.ala.org.au/public/show/dr340 (source published on 2015-01-07)
Australian Museum. Australian Museum provider for OZCAM. Record ID: 00fd2263-2864-4992-9aa7-8a6a7f85963d. Source: http://collections.ala.org.au/public/show/dr340 (source published on 2015-01-07)
Australian Museum. Australian Museum provider for OZCAM. Record ID: 3e740323-bb29-412a-9f35-abb29fbf55fc. Source: http://collections.ala.org.au/public/show/dr340 (source published on 2015-01-07)
Australian Museum. Australian Museum provider for OZCAM. Record ID: 81415266-536e-4de9-963f-5c4efeff20e9. Source: http://collections.ala.org.au/public/show/dr340 (source published on 2015-01-07)
Australian Museum. Australian Museum provider for OZCAM. Record ID: fd6b6a4e-c4ab-4ef4-9a02-b5e082f74774. Source: http://collections.ala.org.au/public/show/dr340 (source published on 2015-01-07)
Australian Museum. Australian Museum provider for OZCAM. Record ID: 09356277-e2fb-4201-b4c1-f3917ba487b6. Source: http://collections.ala.org.au/public/show/dr340 (source published on 2015-01-07)
Australian Museum. Australian Museum provider for OZCAM. Record ID: 08407d17-f3eb-4cf7-ab61-323ab8971897. Source: http://collections.ala.org.au/public/show/dr340 (source published on 2015-01-07)
Australian Museum. Australian Museum provider for OZCAM. Record ID: 14881bb5-1246-4293-bf25-1618ade3a123. Source: http://collections.ala.org.au/public/show/dr340 (source published on 2015-01-07)
Australian Museum. Australian Museum provider for OZCAM. Record ID: 151ad5d2-aef3-4e77-a932-cdcf4fbb3b93. Source: http://collections.ala.org.au/public/show/dr340 (source published on 2015-01-07)
Australian Museum. Australian Museum provider for OZCAM. Record ID: 1ac0884d-71de-4aee-ae3b-284b00ffdbe9. Source: http://collections.ala.org.au/public/show/dr340 (source published on 2015-01-07)
Australian Museum. Australian Museum provider for OZCAM. Record ID: daadd266-6271-4bea-9659-618251f47890. Source: http://collections.ala.org.au/public/show/dr340 (source published on 2015-01-07)
Australian Museum. Australian Museum provider for OZCAM. Record ID: f37c356a-c59a-4043-95ea-1a80863b0054. Source: http://collections.ala.org.au/public/show/dr340 (source published on 2015-01-07)
Australian Museum. Australian Museum provider for OZCAM. Record ID: 3b4d3c9e-83f8-4df5-b2ab-c674740699bb. Source: http://collections.ala.org.au/public/show/dr340 (source published on 2015-01-07)
Australian Museum. Australian Museum provider for OZCAM. Record ID: 43bef330-87eb-4fc1-9990-ef512bb0c5f5. Source: http://collections.ala.org.au/public/show/dr340 (source published on 2015-01-07)
Australian Museum. Australian Museum provider for OZCAM. Record ID: 4fe0a4ad-a047-452c-b0b5-0f434104ee24. Source: http://collections.ala.org.au/public/show/dr340 (source published on 2015-01-07)
Australian Museum. Australian Museum provider for OZCAM. Record ID: 8b0fea50-7780-4653-9682-0316b542741b. Source: http://collections.ala.org.au/public/show/dr340 (source published on 2015-01-07)
Australian Museum. Australian Museum provider for OZCAM. Record ID: 9c5a50de-6c84-4781-b46b-a38d1950901b. Source: http://collections.ala.org.au/public/show/dr340 (source published on 2015-01-07)
Australian Museum. Australian Museum provider for OZCAM. Record ID: a73f569e-bfea-4b94-be6a-ba5658703b88. Source: http://collections.ala.org.au/public/show/dr340 (source published on 2015-01-07)
Australian Museum. Australian Museum provider for OZCAM. Record ID: 8968d2aa-2783-476f-b219-2442d6224f02. Source: http://collections.ala.org.au/public/show/dr340 (source published on 2015-01-07)
Australian Museum. Australian Museum provider for OZCAM. Record ID: c4dea373-2b12-44e6-a096-a400fb9a92a9. Source: http://collections.ala.org.au/public/show/dr340 (source published on 2015-01-07)
Australian Museum. Australian Museum provider for OZCAM. Record ID: ed928b8e-d346-4904-8e0c-be7c37392c57. Source: http://collections.ala.org.au/public/show/dr340 (source published on 2015-01-07)
Australian Museum. Australian Museum provider for OZCAM. Record ID: 5f1418be-44b6-4eac-8baf-72f616ec8002. Source: http://collections.ala.org.au/public/show/dr340 (source published on 2015-01-07)
Australian Museum. Australian Museum provider for OZCAM. Record ID: 46eed6e3-cc47-4d54-b3c7-f34c45fe0a8c. Source: http://collections.ala.org.au/public/show/dr340 (source published on 2015-01-07)
Australian Museum. Australian Museum provider for OZCAM. Record ID: 3626b63b-56a4-4daa-85ec-2495f3da8d94. Source: http://collections.ala.org.au/public/show/dr340 (source published on 2015-01-07)
Australian Museum. Australian Museum provider for OZCAM. Record ID: 22d4d33a-3a08-43f2-a41e-85eb05ae059f. Source: http://collections.ala.org.au/public/show/dr340 (source published on 2015-01-07)
Australian Museum. Australian Museum provider for OZCAM. Record ID: 3a9d33a8-572e-4fd9-8e37-5d657767b33e. Source: http://collections.ala.org.au/public/show/dr340 (source published on 2015-01-07)
Australian Museum. Australian Museum provider for OZCAM. Record ID: 6e4fceb8-22cc-40f1-8eef-d36c3ab43b0e. Source: http://collections.ala.org.au/public/show/dr340 (source published on 2015-01-07)
Australian Museum. Australian Museum provider for OZCAM. Record ID: 76ea5f12-2dee-4101-94be-d9e7ef620801. Source: http://collections.ala.org.au/public/show/dr340 (source published on 2015-01-07)
Australian Museum. Australian Museum provider for OZCAM. Record ID: 7a1032f7-eb57-49dd-9600-c199dea82b8f. Source: http://collections.ala.org.au/public/show/dr340 (source published on 2015-01-07)
Australian Museum. Australian Museum provider for OZCAM. Record ID: 833f9e66-7be2-4668-b829-0ce90328f2e3. Source: http://collections.ala.org.au/public/show/dr340 (source published on 2015-01-07)
Australian Museum. Australian Museum provider for OZCAM. Record ID: d01257a5-bf49-4084-b6d7-e23ffc7c5801. Source: http://collections.ala.org.au/public/show/dr340 (source published on 2015-01-07)
Australian Museum. Australian Museum provider for OZCAM. Record ID: d9c38d0a-c5f3-449c-a241-0a026db95413. Source: http://collections.ala.org.au/public/show/dr340 (source published on 2015-01-07)
Australian Museum. Australian Museum provider for OZCAM. Record ID: 0c90be1c-f5f6-4af6-9223-ad796866e92b. Source: http://collections.ala.org.au/public/show/dr340 (source published on 2015-01-07)
Australian Museum. Australian Museum provider for OZCAM. Record ID: 17787ca0-3174-4435-ac07-a47811f11a82. Source: http://collections.ala.org.au/public/show/dr340 (source published on 2015-01-07)
Australian Museum. Australian Museum provider for OZCAM. Record ID: 424ab262-a526-47aa-8c19-e4ed0516b01c. Source: http://collections.ala.org.au/public/show/dr340 (source published on 2015-01-07)
Australian Museum. Australian Museum provider for OZCAM. Record ID: 54075903-05ff-4441-bbce-132f07cb3ec4. Source: http://collections.ala.org.au/public/show/dr340 (source published on 2015-01-07)
Australian Museum. Australian Museum provider for OZCAM. Record ID: 5a98c469-5534-4760-a193-8fc04d47a8ac. Source: http://collections.ala.org.au/public/show/dr340 (source published on 2015-01-07)
Australian Museum. Australian Museum provider for OZCAM. Record ID: 7902c662-f8af-4db0-849f-73c3e29970b1. Source: http://collections.ala.org.au/public/show/dr340 (source published on 2015-01-07)
Australian Museum. Australian Museum provider for OZCAM. Record ID: c06ecfba-34e7-4578-ae58-ef7737f07466. Source: http://collections.ala.org.au/public/show/dr340 (source published on 2015-01-07)
Australian Museum. Australian Museum provider for OZCAM. Record ID: c7bcb6ed-1574-4176-b775-dbaf9e964714. Source: http://collections.ala.org.au/public/show/dr340 (source published on 2015-01-07)
Australian Museum. Australian Museum provider for OZCAM. Record ID: ef157509-7710-45b0-884b-f1808385ae63. Source: http://collections.ala.org.au/public/show/dr340 (source published on 2015-01-07)
Australian Museum. Australian Museum provider for OZCAM. Record ID: f4301c5b-b5f7-4655-8a5a-736b5e3414cd. Source: http://collections.ala.org.au/public/show/dr340 (source published on 2015-01-07)
Australian Museum. Australian Museum provider for OZCAM. Record ID: e6cc3e50-e4ab-4f4b-b9ac-27aa8f0c7195. Source: http://collections.ala.org.au/public/show/dr340 (source published on 2015-01-07)
Australian Museum. Australian Museum provider for OZCAM. Record ID: 6b501c60-455a-46ff-ad7d-20f5647b6b1c. Source: http://collections.ala.org.au/public/show/dr340 (source published on 2015-01-07)
Australian Museum. Australian Museum provider for OZCAM. Record ID: 8f0e736d-1f79-4e75-a57e-e9d62008f3e6. Source: http://collections.ala.org.au/public/show/dr340 (source published on 2015-01-07)
Australian Museum. Australian Museum provider for OZCAM. Record ID: 404a9cb5-e001-490d-ab8d-f248fc0b6d09. Source: http://collections.ala.org.au/public/show/dr340 (source published on 2015-01-07)
Australian Museum. Australian Museum provider for OZCAM. Record ID: de412d01-6757-411a-af70-a995c3f363c9. Source: http://collections.ala.org.au/public/show/dr340 (source published on 2015-01-07)
Australian Museum. Australian Museum provider for OZCAM. Record ID: adc5e0cd-c565-4112-bbe4-12b8473cc59a. Source: http://collections.ala.org.au/public/show/dr340 (source published on 2015-01-07)
Australian Museum. Australian Museum provider for OZCAM. Record ID: 63477a57-0de0-4420-8659-18065a3bf49e. Source: http://collections.ala.org.au/public/show/dr340 (source published on 2015-01-07)
Australian Museum. Australian Museum provider for OZCAM. Record ID: bd033dbf-914c-4fa5-8b58-f8f0ab12a11f. Source: http://collections.ala.org.au/public/show/dr340 (source published on 2015-01-07)
Australian Museum. Australian Museum provider for OZCAM. Record ID: 15609ed1-1da0-4d74-a956-8f114d59ed2b. Source: http://collections.ala.org.au/public/show/dr340 (source published on 2015-01-07)
Australian Museum. Australian Museum provider for OZCAM. Record ID: f6f85df1-4a85-4262-a16e-a5b8eb764c53. Source: http://collections.ala.org.au/public/show/dr340 (source published on 2015-01-07)
Australian Museum. Australian Museum provider for OZCAM. Record ID: ef92d5cc-a9ed-46aa-908a-464fbd8c6b1a. Source: http://collections.ala.org.au/public/show/dr340 (source published on 2015-01-07)
Australian Museum. Australian Museum provider for OZCAM. Record ID: 1898cdc3-a484-447f-b8e0-c52da0245e03. Source: http://collections.ala.org.au/public/show/dr340 (source published on 2015-01-07)
Australian Museum. Australian Museum provider for OZCAM. Record ID: 3e4adb45-85e5-457d-8984-255e21e4c5f9. Source: http://collections.ala.org.au/public/show/dr340 (source published on 2015-01-07)
Australian Museum. Australian Museum provider for OZCAM. Record ID: 928cd06e-39f9-4b70-8d88-fbe88f9ce189. Source: http://collections.ala.org.au/public/show/dr340 (source published on 2015-01-07)
Australian Museum. Australian Museum provider for OZCAM. Record ID: 87a3e01c-a8a4-46f7-b19d-3d08e016d842. Source: http://collections.ala.org.au/public/show/dr340 (source published on 2015-01-07)
Australian Museum. Australian Museum provider for OZCAM. Record ID: 338eb5d9-ba1d-427a-b340-ec8727a3e5ab. Source: http://collections.ala.org.au/public/show/dr340 (source published on 2015-01-07)
Australian Museum. Australian Museum provider for OZCAM. Record ID: e688c946-568e-4d1b-bc8b-9dd913114ab2. Source: http://collections.ala.org.au/public/show/dr340 (source published on 2015-01-07)
Australian Museum. Australian Museum provider for OZCAM. Record ID: d875030a-a86a-48d4-b2fd-6506231ffd14. Source: http://collections.ala.org.au/public/show/dr340 (source published on 2015-01-07)
Australian Museum. Australian Museum provider for OZCAM. Record ID: c4f02e6f-4a53-4c70-9d4b-f68207f1beb9. Source: http://collections.ala.org.au/public/show/dr340 (source published on 2015-01-07)
Australian Museum. Australian Museum provider for OZCAM. Record ID: f105cf8c-9d72-4d30-ac63-a5e8bc499323. Source: http://collections.ala.org.au/public/show/dr340 (source published on 2015-01-07)
Australian Museum. Australian Museum provider for OZCAM. Record ID: 2a23ef33-0327-4045-a800-dc85e8261aef. Source: http://collections.ala.org.au/public/show/dr340 (source published on 2015-01-07)
Australian Museum. Australian Museum provider for OZCAM. Record ID: 8fff6ed5-8a32-41ce-82d0-0148ad994167. Source: http://collections.ala.org.au/public/show/dr340 (source published on 2015-01-07)
Australian Museum. Australian Museum provider for OZCAM. Record ID: 2f20e709-8b82-4ecd-894c-d4dc5ee7019d. Source: http://collections.ala.org.au/public/show/dr340 (source published on 2015-01-07)
Australian Museum. Australian Museum provider for OZCAM. Record ID: 01940dcd-5e05-4a3b-9aca-39ca840fca94. Source: http://collections.ala.org.au/public/show/dr340 (source published on 2015-01-07)
Australian Museum. Australian Museum provider for OZCAM. Record ID: 05d66a84-ae33-44d7-ba9d-5708e47b6137. Source: http://collections.ala.org.au/public/show/dr340 (source published on 2015-01-07)
Australian Museum. Australian Museum provider for OZCAM. Record ID: 57c93a5c-4e90-47b1-a2c1-55e32f277b79. Source: http://collections.ala.org.au/public/show/dr340 (source published on 2015-01-07)
Australian Museum. Australian Museum provider for OZCAM. Record ID: 7456a361-efc3-4a33-bb63-f02dc43d049f. Source: http://collections.ala.org.au/public/show/dr340 (source published on 2015-01-07)
Australian Museum. Australian Museum provider for OZCAM. Record ID: 48d6d013-4001-40bd-9e47-d8788cdfc484. Source: http://collections.ala.org.au/public/show/dr340 (source published on 2015-01-07)
Australian Museum. Australian Museum provider for OZCAM. Record ID: cdc7361b-6e20-40de-b57b-86fa40f0ef9f. Source: http://collections.ala.org.au/public/show/dr340 (source published on 2015-01-07)
Australian Museum. Australian Museum provider for OZCAM. Record ID: e6d1023a-b0a3-4964-8f8b-9e112eadcbe9. Source: http://collections.ala.org.au/public/show/dr340 (source published on 2015-01-07)
Australian Museum. Australian Museum provider for OZCAM. Record ID: 19ca9957-a95d-44bd-ac80-38168ba63b1e. Source: http://collections.ala.org.au/public/show/dr340 (source published on 2015-01-07)
Australian Museum. Australian Museum provider for OZCAM. Record ID: ab5fe587-312d-432d-8c76-55147e905594. Source: http://collections.ala.org.au/public/show/dr340 (source published on 2015-01-07)
Australian Museum. Australian Museum provider for OZCAM. Record ID: b991f72e-d0f8-4ae9-aaaa-a28cf1ed8853. Source: http://collections.ala.org.au/public/show/dr340 (source published on 2015-01-07)
Australian Museum. Australian Museum provider for OZCAM. Record ID: d33b4386-3836-4e54-b189-b09415f8036d. Source: http://collections.ala.org.au/public/show/dr340 (source published on 2015-01-07)
Australian Museum. Australian Museum provider for OZCAM. Record ID: 0d148aac-dbdf-44fb-82f8-82e513d32111. Source: http://collections.ala.org.au/public/show/dr340 (source published on 2015-01-07)
Australian Museum. Australian Museum provider for OZCAM. Record ID: 4b929d95-bf9e-484e-8fce-3ce0c3092a2e. Source: http://collections.ala.org.au/public/show/dr340 (source published on 2015-01-07)
Australian Museum. Australian Museum provider for OZCAM. Record ID: 4caafe14-10d4-4c41-914c-64c52581f6f3. Source: http://collections.ala.org.au/public/show/dr340 (source published on 2015-01-07)
Australian Museum. Australian Museum provider for OZCAM. Record ID: 59a51d75-6c49-4346-9fc0-29de3011b81b. Source: http://collections.ala.org.au/public/show/dr340 (source published on 2015-01-07)
Australian Museum. Australian Museum provider for OZCAM. Record ID: 33ff4066-937b-47bd-adb8-28d741e652cf. Source: http://collections.ala.org.au/public/show/dr340 (source published on 2015-01-07)
Australian Museum. Australian Museum provider for OZCAM. Record ID: bb988b3a-ed84-4ac9-9463-8d2deb0b50ea. Source: http://collections.ala.org.au/public/show/dr340 (source published on 2015-01-07)
Australian Museum. Australian Museum provider for OZCAM. Record ID: 16239030-c16c-4880-ab81-0fb190810d25. Source: http://collections.ala.org.au/public/show/dr340 (source published on 2015-01-07)
Australian Museum. Australian Museum provider for OZCAM. Record ID: 4730afd6-cadc-461c-b059-b08536725cfd. Source: http://collections.ala.org.au/public/show/dr340 (source published on 2015-01-07)
Australian Museum. Australian Museum provider for OZCAM. Record ID: 3787c7fd-b26b-4d15-8d38-0d5c4714b7dc. Source: http://collections.ala.org.au/public/show/dr340 (source published on 2015-01-07)
Australian Museum. Australian Museum provider for OZCAM. Record ID: c4ff09ee-89be-4f33-af0c-3dda2d689d8a. Source: http://collections.ala.org.au/public/show/dr340 (source published on 2015-01-07)
Australian Museum. Australian Museum provider for OZCAM. Record ID: d9fcd322-f747-421a-b33a-4994ba5c9284. Source: http://collections.ala.org.au/public/show/dr340 (source published on 2015-01-07)
Australian Museum. Australian Museum provider for OZCAM. Record ID: 0532077b-852a-47fb-b83f-e5410c3dc9e4. Source: http://collections.ala.org.au/public/show/dr340 (source published on 2015-01-07)
Australian Museum. Australian Museum provider for OZCAM. Record ID: b2d3cf01-b017-47b2-8d53-eb74d4065f2a. Source: http://collections.ala.org.au/public/show/dr340 (source published on 2015-01-07)
Australian Museum. Australian Museum provider for OZCAM. Record ID: 63ed94f0-9c07-4852-af19-2c63919d679b. Source: http://collections.ala.org.au/public/show/dr340 (source published on 2015-01-07)
Australian Museum. Australian Museum provider for OZCAM. Record ID: 6eff7305-0c85-455a-927f-aaf19e3a0842. Source: http://collections.ala.org.au/public/show/dr340 (source published on 2015-01-07)
Australian Museum. Australian Museum provider for OZCAM. Record ID: a5cde726-de4f-47a3-8fcc-ff2fd296cf72. Source: http://collections.ala.org.au/public/show/dr340 (source published on 2015-01-07)
Australian Museum. Australian Museum provider for OZCAM. Record ID: fabcf6f3-e1ad-4a54-806b-ffd7030e104d. Source: http://collections.ala.org.au/public/show/dr340 (source published on 2015-01-07)
Australian Museum. Australian Museum provider for OZCAM. Record ID: 8b0b6806-1cf9-4345-8522-d24a25ba0843. Source: http://collections.ala.org.au/public/show/dr340 (source published on 2015-01-07)
Australian Museum. Australian Museum provider for OZCAM. Record ID: 1c5d8f5d-0cc6-4643-9586-ec957a2d9f1b. Source: http://collections.ala.org.au/public/show/dr340 (source published on 2015-01-07)
Australian Museum. Australian Museum provider for OZCAM. Record ID: c53591dc-b3cd-4b76-85ff-d55e84d385d3. Source: http://collections.ala.org.au/public/show/dr340 (source published on 2015-01-07)
Australian Museum. Australian Museum provider for OZCAM. Record ID: 4f555f63-2a32-4f6d-9d96-f0c7614b3fe8. Source: http://collections.ala.org.au/public/show/dr340 (source published on 2015-01-07)
Australian Museum. Australian Museum provider for OZCAM. Record ID: 1bf4776f-5612-440f-b31e-a90f72e5d30f. Source: http://collections.ala.org.au/public/show/dr340 (source published on 2015-01-07)
Australian Museum. Australian Museum provider for OZCAM. Record ID: 91f38ad4-f4d6-4d68-9398-37a297c073a0. Source: http://collections.ala.org.au/public/show/dr340 (source published on 2015-01-07)
Australian Museum. Australian Museum provider for OZCAM. Record ID: af1e4f05-b3e6-49d2-a712-eb335f5961e2. Source: http://collections.ala.org.au/public/show/dr340 (source published on 2015-01-07)
Australian Museum. Australian Museum provider for OZCAM. Record ID: 45f6f2bf-6d71-4f30-be64-d0e9aaa48787. Source: http://collections.ala.org.au/public/show/dr340 (source published on 2015-01-07)
Australian Museum. Australian Museum provider for OZCAM. Record ID: 61c3b764-4419-45fd-a390-fd72132a0cb4. Source: http://collections.ala.org.au/public/show/dr340 (source published on 2015-01-07)
Australian Museum. Australian Museum provider for OZCAM. Record ID: d88c4c90-de86-41ce-a5e3-87368ffced4a. Source: http://collections.ala.org.au/public/show/dr340 (source published on 2015-01-07)
Australian Museum. Australian Museum provider for OZCAM. Record ID: 388c33ca-4772-4e5a-9831-79fe8a7a09c7. Source: http://collections.ala.org.au/public/show/dr340 (source published on 2015-01-07)
Australian Museum. Australian Museum provider for OZCAM. Record ID: 490d49ac-8cc7-4e46-8e7d-7fc830c7e740. Source: http://collections.ala.org.au/public/show/dr340 (source published on 2015-01-07)
Australian Museum. Australian Museum provider for OZCAM. Record ID: 00778ec8-796e-4d56-874c-420687207999. Source: http://collections.ala.org.au/public/show/dr340 (source published on 2015-01-07)
Australian Museum. Australian Museum provider for OZCAM. Record ID: 95d80f37-5860-43a5-8a0f-19c8cf88d2b4. Source: http://collections.ala.org.au/public/show/dr340 (source published on 2015-01-07)
Australian Museum. Australian Museum provider for OZCAM. Record ID: 1cc2ad58-d9c1-4f1d-9182-884847f6fb55. Source: http://collections.ala.org.au/public/show/dr340 (source published on 2015-01-07)
Australian Museum. Australian Museum provider for OZCAM. Record ID: 453e9fcd-cfa5-4181-ba24-020071a97b32. Source: http://collections.ala.org.au/public/show/dr340 (source published on 2015-01-07)
Australian Museum. Australian Museum provider for OZCAM. Record ID: d595c342-5030-4246-b582-7663dc4ffefc. Source: http://collections.ala.org.au/public/show/dr340 (source published on 2015-01-07)
Australian Museum. Australian Museum provider for OZCAM. Record ID: 0362bfdd-876d-4eaa-8588-65ff43fa9a00. Source: http://collections.ala.org.au/public/show/dr340 (source published on 2015-01-07)
Australian Museum. Australian Museum provider for OZCAM. Record ID: 9f28f17f-83e1-49d7-89dc-827e2f31bbf8. Source: http://collections.ala.org.au/public/show/dr340 (source published on 2015-01-07)
Australian Museum. Australian Museum provider for OZCAM. Record ID: f69e4e1d-90ab-4ee3-930d-da4865ba322a. Source: http://collections.ala.org.au/public/show/dr340 (source published on 2015-01-07)
Australian Museum. Australian Museum provider for OZCAM. Record ID: 17670198-1588-4eb3-9b69-1943dd30b8bc. Source: http://collections.ala.org.au/public/show/dr340 (source published on 2015-01-07)
Australian Museum. Australian Museum provider for OZCAM. Record ID: 2cca30a7-49b1-4906-818e-c7a38da981fd. Source: http://collections.ala.org.au/public/show/dr340 (source published on 2015-01-07)
Australian Museum. Australian Museum provider for OZCAM. Record ID: 4173bddc-26bb-4d6e-9546-76c4966605ac. Source: http://collections.ala.org.au/public/show/dr340 (source published on 2015-01-07)
Australian Museum. Australian Museum provider for OZCAM. Record ID: 7139cb5c-5296-4403-ab77-6919fb1236db. Source: http://collections.ala.org.au/public/show/dr340 (source published on 2015-01-07)
Australian Museum. Australian Museum provider for OZCAM. Record ID: cc6b91ff-9eed-49b0-9ac0-222b1afbaf0a. Source: http://collections.ala.org.au/public/show/dr340 (source published on 2015-01-07)
Australian Museum. Australian Museum provider for OZCAM. Record ID: b7c0121f-7cb5-4014-98d4-9e10afbc1462. Source: http://collections.ala.org.au/public/show/dr340 (source published on 2015-01-07)
Australian Museum. Australian Museum provider for OZCAM. Record ID: f9c502a0-8d30-4540-8e69-9177ca0bae31. Source: http://collections.ala.org.au/public/show/dr340 (source published on 2015-01-07)
Australian Museum. Australian Museum provider for OZCAM. Record ID: 90e107fd-ea7a-45e3-9672-bea39a9d64b3. Source: http://collections.ala.org.au/public/show/dr340 (source published on 2015-01-07)
Australian Museum. Australian Museum provider for OZCAM. Record ID: b952d90b-b416-49c0-8bd3-3a3841d85cc6. Source: http://collections.ala.org.au/public/show/dr340 (source published on 2015-01-07)
Australian Museum. Australian Museum provider for OZCAM. Record ID: f0c1c274-1080-4e2f-a4f2-30f9796c6461. Source: http://collections.ala.org.au/public/show/dr340 (source published on 2015-01-07)
Australian Museum. Australian Museum provider for OZCAM. Record ID: fb6d30e8-e269-40b6-895f-070181855d20. Source: http://collections.ala.org.au/public/show/dr340 (source published on 2015-01-07)
Australian Museum. Australian Museum provider for OZCAM. Record ID: c72ac3c2-06fd-4078-9c34-e784ca1061cd. Source: http://collections.ala.org.au/public/show/dr340 (source published on 2015-01-07)
Australian Museum. Australian Museum provider for OZCAM. Record ID: 4f7639c0-c752-4cf6-8c36-b34cb09d28fc. Source: http://collections.ala.org.au/public/show/dr340 (source published on 2015-01-07)
Australian Museum. Australian Museum provider for OZCAM. Record ID: 943b9dcb-aebf-4b3d-b82a-78c21053f8d0. Source: http://collections.ala.org.au/public/show/dr340 (source published on 2015-01-07)
Australian Museum. Australian Museum provider for OZCAM. Record ID: f620a009-769b-48c8-b792-473b5483f3d7. Source: http://collections.ala.org.au/public/show/dr340 (source published on 2015-01-07)
Australian Museum. Australian Museum provider for OZCAM. Record ID: 5a057e58-929d-40f8-9a92-487f4ca0fc74. Source: http://collections.ala.org.au/public/show/dr340 (source published on 2015-01-07)
Australian Museum. Australian Museum provider for OZCAM. Record ID: f555417d-8b61-4697-9bd7-c600dc8f7502. Source: http://collections.ala.org.au/public/show/dr340 (source published on 2015-01-07)
Australian Museum. Australian Museum provider for OZCAM. Record ID: bc295448-9a7d-4e93-8462-132033c56cfe. Source: http://collections.ala.org.au/public/show/dr340 (source published on 2015-01-07)
Australian Museum. Australian Museum provider for OZCAM. Record ID: 03d18d49-49df-4434-9950-8b7edfe40972. Source: http://collections.ala.org.au/public/show/dr340 (source published on 2015-01-07)
Australian Museum. Australian Museum provider for OZCAM. Record ID: 7e6dd4ff-cb35-48df-bead-5b28dd620faa. Source: http://collections.ala.org.au/public/show/dr340 (source published on 2015-01-07)
Australian Museum. Australian Museum provider for OZCAM. Record ID: 1c4723d3-e5a6-4d54-a403-45f9ad92f2be. Source: http://collections.ala.org.au/public/show/dr340 (source published on 2015-01-07)
Australian Museum. Australian Museum provider for OZCAM. Record ID: 05bce1bb-f5d6-47d8-abd8-54465da63edc. Source: http://collections.ala.org.au/public/show/dr340 (source published on 2015-01-07)
Australian Museum. Australian Museum provider for OZCAM. Record ID: 64d26441-898d-4e32-981f-ce7267d5b074. Source: http://collections.ala.org.au/public/show/dr340 (source published on 2015-01-07)
Australian Museum. Australian Museum provider for OZCAM. Record ID: ef531435-9fb5-4472-945b-49395dbbdc1b. Source: http://collections.ala.org.au/public/show/dr340 (source published on 2015-01-07)
Australian Museum. Australian Museum provider for OZCAM. Record ID: 34b1a36c-e20a-4a3a-98b4-3a771fbf2465. Source: http://collections.ala.org.au/public/show/dr340 (source published on 2015-01-07)
Australian Museum. Australian Museum provider for OZCAM. Record ID: 543382a5-e2b3-4f51-bcc7-272b162adae7. Source: http://collections.ala.org.au/public/show/dr340 (source published on 2015-01-07)
Australian Museum. Australian Museum provider for OZCAM. Record ID: 6e9c3641-53c3-45d4-b0f4-8be4d355a827. Source: http://collections.ala.org.au/public/show/dr340 (source published on 2015-01-07)
Australian Museum. Australian Museum provider for OZCAM. Record ID: 54931446-c5c9-4f71-a0dd-ed12afccb000. Source: http://collections.ala.org.au/public/show/dr340 (source published on 2015-01-07)
Australian Museum. Australian Museum provider for OZCAM. Record ID: 55985077-9f8b-4c48-a135-78ae36d18961. Source: http://collections.ala.org.au/public/show/dr340 (source published on 2015-01-07)
Australian Museum. Australian Museum provider for OZCAM. Record ID: 037ba065-bdcc-4965-b854-717b93884ee3. Source: http://collections.ala.org.au/public/show/dr340 (source published on 2015-01-07)
Australian Museum. Australian Museum provider for OZCAM. Record ID: 99feaee3-b5ce-40bf-abb1-36d24d17e968. Source: http://collections.ala.org.au/public/show/dr340 (source published on 2015-01-07)
Australian Museum. Australian Museum provider for OZCAM. Record ID: 9f8535db-cad3-4d3f-a110-ce5a4afee66e. Source: http://collections.ala.org.au/public/show/dr340 (source published on 2015-01-07)
Australian Museum. Australian Museum provider for OZCAM. Record ID: 3e0c5cb0-8bbc-49e6-96f9-7cac8613bffc. Source: http://collections.ala.org.au/public/show/dr340 (source published on 2015-01-07)
Australian Museum. Australian Museum provider for OZCAM. Record ID: 5b20f7a7-dc85-4688-bb46-8a3bbad4c365. Source: http://collections.ala.org.au/public/show/dr340 (source published on 2015-01-07)
Australian Museum. Australian Museum provider for OZCAM. Record ID: 7615fd73-528c-44fb-9e8a-a9644f8765e4. Source: http://collections.ala.org.au/public/show/dr340 (source published on 2015-01-07)
Australian Museum. Australian Museum provider for OZCAM. Record ID: 0e3bf99b-8f2a-498b-a397-7489972ef4d9. Source: http://collections.ala.org.au/public/show/dr340 (source published on 2015-01-07)
Australian Museum. Australian Museum provider for OZCAM. Record ID: 1f177c78-c8c6-4349-9664-3539a1ee321e. Source: http://collections.ala.org.au/public/show/dr340 (source published on 2015-01-07)
Australian Museum. Australian Museum provider for OZCAM. Record ID: 3ecbb5cc-44d1-4740-87c7-8f8ae204b910. Source: http://collections.ala.org.au/public/show/dr340 (source published on 2015-01-07)
Australian Museum. Australian Museum provider for OZCAM. Record ID: b2239601-f522-45a0-8171-55ac07629b9c. Source: http://collections.ala.org.au/public/show/dr340 (source published on 2015-01-07)
Australian Museum. Australian Museum provider for OZCAM. Record ID: 58e6e99b-0bec-4cb0-a825-0ea867081209. Source: http://collections.ala.org.au/public/show/dr340 (source published on 2015-01-07)
Australian Museum. Australian Museum provider for OZCAM. Record ID: 3763d776-c9eb-4d3c-a309-2adbd127fe61. Source: http://collections.ala.org.au/public/show/dr340 (source published on 2015-01-07)
Australian Museum. Australian Museum provider for OZCAM. Record ID: 1f96ab70-134c-48fc-90c1-ae24552b1fb2. Source: http://collections.ala.org.au/public/show/dr340 (source published on 2015-01-07)
Australian Museum. Australian Museum provider for OZCAM. Record ID: 8621eead-4884-4d2e-9912-869051df794f. Source: http://collections.ala.org.au/public/show/dr340 (source published on 2015-01-07)
Australian Museum. Australian Museum provider for OZCAM. Record ID: 7d3534d7-a035-406c-914c-84d04ca77121. Source: http://collections.ala.org.au/public/show/dr340 (source published on 2015-01-07)
Australian Museum. Australian Museum provider for OZCAM. Record ID: c5a851fb-460a-4286-95a0-633e076e7c84. Source: http://collections.ala.org.au/public/show/dr340 (source published on 2015-01-07)
Australian Museum. Australian Museum provider for OZCAM. Record ID: 7ee7c061-ace0-4a26-a7dc-aa766ff7a250. Source: http://collections.ala.org.au/public/show/dr340 (source published on 2015-01-07)
Australian Museum. Australian Museum provider for OZCAM. Record ID: 275bd09a-b484-450c-9a0b-a879a4310999. Source: http://collections.ala.org.au/public/show/dr340 (source published on 2015-01-07)
Australian Museum. Australian Museum provider for OZCAM. Record ID: d7a55de6-6e13-48fd-9601-9e533da7639c. Source: http://collections.ala.org.au/public/show/dr340 (source published on 2015-01-07)
Australian Museum. Australian Museum provider for OZCAM. Record ID: 0117175b-5ed5-41ee-8987-1710645326ae. Source: http://collections.ala.org.au/public/show/dr340 (source published on 2015-01-07)
Australian Museum. Australian Museum provider for OZCAM. Record ID: 00db833c-5472-4230-ad40-a194391ee952. Source: http://collections.ala.org.au/public/show/dr340 (source published on 2015-01-07)
Australian Museum. Australian Museum provider for OZCAM. Record ID: 46e2836b-60c7-4404-95d6-0a88324fd4e8. Source: http://collections.ala.org.au/public/show/dr340 (source published on 2015-01-07)
Australian Museum. Australian Museum provider for OZCAM. Record ID: fa7d21d0-7a02-4ffc-9b7d-ed9fb24f85e9. Source: http://collections.ala.org.au/public/show/dr340 (source published on 2015-01-07)
Australian Museum. Australian Museum provider for OZCAM. Record ID: 96d65b1c-a450-457f-8c5c-a33b3a924008. Source: http://collections.ala.org.au/public/show/dr340 (source published on 2015-01-07)
Australian Museum. Australian Museum provider for OZCAM. Record ID: c8200fc4-0c44-4501-a015-1cd1a78c31f7. Source: http://collections.ala.org.au/public/show/dr340 (source published on 2015-01-07)
Australian Museum. Australian Museum provider for OZCAM. Record ID: eb1beafd-cb74-4b46-a0c7-7091133d96f2. Source: http://collections.ala.org.au/public/show/dr340 (source published on 2015-01-07)
Australian Museum. Australian Museum provider for OZCAM. Record ID: 421f0e77-9dfb-443b-95fc-c4ddd7310345. Source: http://collections.ala.org.au/public/show/dr340 (source published on 2015-01-07)
Australian Museum. Australian Museum provider for OZCAM. Record ID: 82ff3228-a742-47b9-81b4-69c9c99eb26c. Source: http://collections.ala.org.au/public/show/dr340 (source published on 2015-01-07)
Australian Museum. Australian Museum provider for OZCAM. Record ID: e9c8dab9-01ba-408c-bc5c-4a4d47cbccf0. Source: http://collections.ala.org.au/public/show/dr340 (source published on 2015-01-07)
Australian Museum. Australian Museum provider for OZCAM. Record ID: 36d02726-20bd-49cf-8516-7f03a42818c2. Source: http://collections.ala.org.au/public/show/dr340 (source published on 2015-01-07)
Australian Museum. Australian Museum provider for OZCAM. Record ID: 18a335c5-d8c8-4071-bbc4-650830b0426a. Source: http://collections.ala.org.au/public/show/dr340 (source published on 2015-01-07)
Australian Museum. Australian Museum provider for OZCAM. Record ID: bbfd779c-6361-4940-a84c-f160983d8e61. Source: http://collections.ala.org.au/public/show/dr340 (source published on 2015-01-07)
Australian Museum. Australian Museum provider for OZCAM. Record ID: 983254e5-b5c4-4da5-b2b6-a6b2978f4aca. Source: http://collections.ala.org.au/public/show/dr340 (source published on 2015-01-07)
Australian Museum. Australian Museum provider for OZCAM. Record ID: f7d0e74e-f264-422d-8a00-455f7e081d3c. Source: http://collections.ala.org.au/public/show/dr340 (source published on 2015-01-07)
Australian Museum. Australian Museum provider for OZCAM. Record ID: a9f140d2-b7e9-4a95-b0d1-5f030a50a6e7. Source: http://collections.ala.org.au/public/show/dr340 (source published on 2015-01-07)
Australian Museum. Australian Museum provider for OZCAM. Record ID: b5cc40f6-7536-48fe-bee8-78d6b80fa6f3. Source: http://collections.ala.org.au/public/show/dr340 (source published on 2015-01-07)
Australian Museum. Australian Museum provider for OZCAM. Record ID: 6337369e-df2d-47eb-9bb0-ce6350567f89. Source: http://collections.ala.org.au/public/show/dr340 (source published on 2015-01-07)
Australian Museum. Australian Museum provider for OZCAM. Record ID: cceee12b-074e-4235-920a-79f8658f348a. Source: http://collections.ala.org.au/public/show/dr340 (source published on 2015-01-07)
Australian Museum. Australian Museum provider for OZCAM. Record ID: 27d063a4-1e74-4369-b1ed-667d64d93313. Source: http://collections.ala.org.au/public/show/dr340 (source published on 2015-01-07)
Australian Museum. Australian Museum provider for OZCAM. Record ID: 997f3516-06fc-478c-9dba-d9c49142dee5. Source: http://collections.ala.org.au/public/show/dr340 (source published on 2015-01-07)
Australian Museum. Australian Museum provider for OZCAM. Record ID: 54e1912d-1ecd-4424-995c-59864d5ec126. Source: http://collections.ala.org.au/public/show/dr340 (source published on 2015-01-07)
Australian Museum. Australian Museum provider for OZCAM. Record ID: 48601740-8520-4f86-97ec-4d2bc7a3919a. Source: http://collections.ala.org.au/public/show/dr340 (source published on 2015-01-07)
Australian Museum. Australian Museum provider for OZCAM. Record ID: 10d7263b-7506-47f0-ae32-ddcd28cd4bab. Source: http://collections.ala.org.au/public/show/dr340 (source published on 2015-01-07)
Australian Museum. Australian Museum provider for OZCAM. Record ID: 8dd965c6-bcb1-4cb7-9dca-bc98bc82f0cf. Source: http://collections.ala.org.au/public/show/dr340 (source published on 2015-01-07)
Australian Museum. Australian Museum provider for OZCAM. Record ID: f023292f-f036-4cc4-9a2a-8e600fb46ebe. Source: http://collections.ala.org.au/public/show/dr340 (source published on 2015-01-07)
Australian Museum. Australian Museum provider for OZCAM. Record ID: f9abe610-d27b-4912-88a3-7848453dabe9. Source: http://collections.ala.org.au/public/show/dr340 (source published on 2015-01-07)
Australian Museum. Australian Museum provider for OZCAM. Record ID: 90bb0a4e-e133-491a-bbe7-a1496e2e826e. Source: http://collections.ala.org.au/public/show/dr340 (source published on 2015-01-07)
Australian Museum. Australian Museum provider for OZCAM. Record ID: 19c52724-5dcb-4922-94aa-9caaf465622f. Source: http://collections.ala.org.au/public/show/dr340 (source published on 2015-01-07)
Australian Museum. Australian Museum provider for OZCAM. Record ID: f1f8782c-18fb-4591-8d11-e8c57581c88d. Source: http://collections.ala.org.au/public/show/dr340 (source published on 2015-01-07)
Australian Museum. Australian Museum provider for OZCAM. Record ID: 014db3fa-2851-4053-bbd2-f476de218baa. Source: http://collections.ala.org.au/public/show/dr340 (source published on 2015-01-07)
Australian Museum. Australian Museum provider for OZCAM. Record ID: 0279e488-7a4b-46ba-987f-d7c668594b7d. Source: http://collections.ala.org.au/public/show/dr340 (source published on 2015-01-07)
Australian Museum. Australian Museum provider for OZCAM. Record ID: fdbe996d-41cd-4a59-91c9-5099356649ca. Source: http://collections.ala.org.au/public/show/dr340 (source published on 2015-01-07)
Australian Museum. Australian Museum provider for OZCAM. Record ID: c8a8eefe-521d-40e4-91a4-58b43e355454. Source: http://collections.ala.org.au/public/show/dr340 (source published on 2015-01-07)
Australian Museum. Australian Museum provider for OZCAM. Record ID: dd1f8d23-3496-41ed-98f6-98d435cf64dc. Source: http://collections.ala.org.au/public/show/dr340 (source published on 2015-01-07)
Australian Museum. Australian Museum provider for OZCAM. Record ID: a1f7c7de-d14c-4df2-808f-7fe59056664c. Source: http://collections.ala.org.au/public/show/dr340 (source published on 2015-01-07)
Australian Museum. Australian Museum provider for OZCAM. Record ID: 569ee2eb-d0c7-4b89-afd9-e3ca84266fce. Source: http://collections.ala.org.au/public/show/dr340 (source published on 2015-01-07)
Australian Museum. Australian Museum provider for OZCAM. Record ID: 3d4b9ca0-d473-41ad-857a-08cba3f1ba82. Source: http://collections.ala.org.au/public/show/dr340 (source published on 2015-01-07)
Australian Museum. Australian Museum provider for OZCAM. Record ID: 68f496a4-6cf1-4db9-b75e-cdc1c04c47fc. Source: http://collections.ala.org.au/public/show/dr340 (source published on 2015-01-07)
Australian Museum. Australian Museum provider for OZCAM. Record ID: e4f265e9-f111-4ff2-9a43-9f95b3dcf031. Source: http://collections.ala.org.au/public/show/dr340 (source published on 2015-01-07)
Australian Museum. Australian Museum provider for OZCAM. Record ID: fcbc2656-5fb0-49ef-b877-93671303c67f. Source: http://collections.ala.org.au/public/show/dr340 (source published on 2015-01-07)
Australian Museum. Australian Museum provider for OZCAM. Record ID: cfb45aa1-12ba-41bb-8b4e-2c78bf573833. Source: http://collections.ala.org.au/public/show/dr340 (source published on 2015-01-07)
Australian Museum. Australian Museum provider for OZCAM. Record ID: dbe3e98f-80d0-4e88-9c71-cba43e603adc. Source: http://collections.ala.org.au/public/show/dr340 (source published on 2015-01-07)
Australian Museum. Australian Museum provider for OZCAM. Record ID: 62b735da-9836-4dd0-9a59-6585559c0609. Source: http://collections.ala.org.au/public/show/dr340 (source published on 2015-01-07)
Australian Museum. Australian Museum provider for OZCAM. Record ID: 1d4f0662-8878-4ba1-943c-49ce554f9904. Source: http://collections.ala.org.au/public/show/dr340 (source published on 2015-01-07)
Australian Museum. Australian Museum provider for OZCAM. Record ID: e1504dc3-5303-4d98-b1c6-cb0c49b0ea78. Source: http://collections.ala.org.au/public/show/dr340 (source published on 2015-01-07)
Australian Museum. Australian Museum provider for OZCAM. Record ID: 05ef94bc-5170-410b-ba40-61ee8b800500. Source: http://collections.ala.org.au/public/show/dr340 (source published on 2015-01-07)
Australian Museum. Australian Museum provider for OZCAM. Record ID: 08cb8c72-a9eb-4b20-a893-b0e81d8ebb8e. Source: http://collections.ala.org.au/public/show/dr340 (source published on 2015-01-07)
Australian Museum. Australian Museum provider for OZCAM. Record ID: 2ae5f38d-b84a-42ca-94c1-c339acca7386. Source: http://collections.ala.org.au/public/show/dr340 (source published on 2015-01-07)
Australian Museum. Australian Museum provider for OZCAM. Record ID: 5fd96b05-7911-49d4-9337-5cf27dbdb221. Source: http://collections.ala.org.au/public/show/dr340 (source published on 2015-01-07)
Australian Museum. Australian Museum provider for OZCAM. Record ID: 89621f4e-d68a-4a44-9d58-ddbffb5068e5. Source: http://collections.ala.org.au/public/show/dr340 (source published on 2015-01-07)
Australian Museum. Australian Museum provider for OZCAM. Record ID: 95dba389-7307-4572-be2f-4d60e16c278c. Source: http://collections.ala.org.au/public/show/dr340 (source published on 2015-01-07)
Australian Museum. Australian Museum provider for OZCAM. Record ID: a543d147-9a21-4c5e-a105-a149fd62bee5. Source: http://collections.ala.org.au/public/show/dr340 (source published on 2015-01-07)
Australian Museum. Australian Museum provider for OZCAM. Record ID: a953052e-5f91-4e07-bbd1-a978fe1440e5. Source: http://collections.ala.org.au/public/show/dr340 (source published on 2015-01-07)
Australian Museum. Australian Museum provider for OZCAM. Record ID: c654da20-fd6c-4e99-a56b-43df7fa49aa8. Source: http://collections.ala.org.au/public/show/dr340 (source published on 2015-01-07)
Australian Museum. Australian Museum provider for OZCAM. Record ID: cba5d8df-a6ef-40ba-807b-d38be003d410. Source: http://collections.ala.org.au/public/show/dr340 (source published on 2015-01-07)
Australian Museum. Australian Museum provider for OZCAM. Record ID: d7f778ae-129f-48db-b029-2a70b269e1fe. Source: http://collections.ala.org.au/public/show/dr340 (source published on 2015-01-07)
Australian Museum. Australian Museum provider for OZCAM. Record ID: 196b9720-ab65-44be-9230-f3623e9bda41. Source: http://collections.ala.org.au/public/show/dr340 (source published on 2015-01-07)
Australian Museum. Australian Museum provider for OZCAM. Record ID: 59519c2d-0b99-4fc5-99fc-0e38ad82315c. Source: http://collections.ala.org.au/public/show/dr340 (source published on 2015-01-07)
Australian Museum. Australian Museum provider for OZCAM. Record ID: 6956e7c5-d77a-47b7-aad4-31766cf76e56. Source: http://collections.ala.org.au/public/show/dr340 (source published on 2015-01-07)
Australian Museum. Australian Museum provider for OZCAM. Record ID: b852104e-9a9b-4464-bca4-ccb5c00f356c. Source: http://collections.ala.org.au/public/show/dr340 (source published on 2015-01-07)
Australian Museum. Australian Museum provider for OZCAM. Record ID: c9e775ce-9e5a-4a6f-a424-ba12eba5df84. Source: http://collections.ala.org.au/public/show/dr340 (source published on 2015-01-07)
Australian Museum. Australian Museum provider for OZCAM. Record ID: d41cf431-2a2d-40ab-899c-d8945360708d. Source: http://collections.ala.org.au/public/show/dr340 (source published on 2015-01-07)
Australian Museum. Australian Museum provider for OZCAM. Record ID: dda6a07a-1450-4c26-9b16-c35b1776bbd5. Source: http://collections.ala.org.au/public/show/dr340 (source published on 2015-01-07)
Australian Museum. Australian Museum provider for OZCAM. Record ID: 9337d8de-dcc3-4961-8caf-66f78b433dcf. Source: http://collections.ala.org.au/public/show/dr340 (source published on 2015-01-07)
Australian Museum. Australian Museum provider for OZCAM. Record ID: b621a6d9-7e02-49d4-a724-161522ac20a7. Source: http://collections.ala.org.au/public/show/dr340 (source published on 2015-01-07)
Australian Museum. Australian Museum provider for OZCAM. Record ID: 6eb2e7cb-2991-447a-8169-59623f7b70d7. Source: http://collections.ala.org.au/public/show/dr340 (source published on 2015-01-07)
Australian Museum. Australian Museum provider for OZCAM. Record ID: 73ed464b-69ef-4fbf-b7c2-80cd4382f5c4. Source: http://collections.ala.org.au/public/show/dr340 (source published on 2015-01-07)
Australian Museum. Australian Museum provider for OZCAM. Record ID: b926e51d-1cd4-45c1-8b29-d784dc1aaa42. Source: http://collections.ala.org.au/public/show/dr340 (source published on 2015-01-07)
Australian Museum. Australian Museum provider for OZCAM. Record ID: d9e5731b-2ff7-4a0d-ba77-62e294b3e05a. Source: http://collections.ala.org.au/public/show/dr340 (source published on 2015-01-07)
Australian Museum. Australian Museum provider for OZCAM. Record ID: e1c76945-e09b-45c7-accd-555c58f8dac1. Source: http://collections.ala.org.au/public/show/dr340 (source published on 2015-01-07)
Australian Museum. Australian Museum provider for OZCAM. Record ID: 2cac206f-1afd-4c72-aff2-82d9bba9a2b3. Source: http://collections.ala.org.au/public/show/dr340 (source published on 2015-01-07)
Australian Museum. Australian Museum provider for OZCAM. Record ID: 3b84a6a6-f0c2-4252-9ea2-6a427b54ad08. Source: http://collections.ala.org.au/public/show/dr340 (source published on 2015-01-07)
Australian Museum. Australian Museum provider for OZCAM. Record ID: 81e0bdba-06c7-47aa-add6-47e54d6ba01e. Source: http://collections.ala.org.au/public/show/dr340 (source published on 2015-01-07)
Australian Museum. Australian Museum provider for OZCAM. Record ID: 87ffe71e-6965-4f23-b434-f9381e0faef1. Source: http://collections.ala.org.au/public/show/dr340 (source published on 2015-01-07)
Australian Museum. Australian Museum provider for OZCAM. Record ID: 395ad56e-fbfe-43fb-ab14-7c7b3b08e8b3. Source: http://collections.ala.org.au/public/show/dr340 (source published on 2015-01-07)
Australian Museum. Australian Museum provider for OZCAM. Record ID: 71d9a3ac-8d88-43b4-9a7d-c56da3101994. Source: http://collections.ala.org.au/public/show/dr340 (source published on 2015-01-07)
Australian Museum. Australian Museum provider for OZCAM. Record ID: 750140d5-fedd-490b-8537-9a3c36ba7b88. Source: http://collections.ala.org.au/public/show/dr340 (source published on 2015-01-07)
Australian Museum. Australian Museum provider for OZCAM. Record ID: 236b83ca-936a-4eea-a046-4b93bd49e235. Source: http://collections.ala.org.au/public/show/dr340 (source published on 2015-01-07)
Australian Museum. Australian Museum provider for OZCAM. Record ID: c9fae443-1c9c-49f2-b59a-42b790e3fb07. Source: http://collections.ala.org.au/public/show/dr340 (source published on 2015-01-07)
Australian Museum. Australian Museum provider for OZCAM. Record ID: 5ff1fbad-6c38-46b4-9828-c88403035f91. Source: http://collections.ala.org.au/public/show/dr340 (source published on 2015-01-07)
Australian Museum. Australian Museum provider for OZCAM. Record ID: 70f3df42-8b16-4c06-a721-f12c7af8db86. Source: http://collections.ala.org.au/public/show/dr340 (source published on 2015-01-07)
Australian Museum. Australian Museum provider for OZCAM. Record ID: 118020a3-55e0-48af-84bf-09dae7e35395. Source: http://collections.ala.org.au/public/show/dr340 (source published on 2015-01-07)
Australian Museum. Australian Museum provider for OZCAM. Record ID: 834553f1-1692-4379-8db5-b5b5850b94b6. Source: http://collections.ala.org.au/public/show/dr340 (source published on 2015-01-07)
Australian Museum. Australian Museum provider for OZCAM. Record ID: 5d9715c0-0faa-4f34-81fa-8c42a035a223. Source: http://collections.ala.org.au/public/show/dr340 (source published on 2015-01-07)
Australian Museum. Australian Museum provider for OZCAM. Record ID: 5503da77-e5e9-4366-b2df-e54b7577b96c. Source: http://collections.ala.org.au/public/show/dr340 (source published on 2015-01-07)
Australian Museum. Australian Museum provider for OZCAM. Record ID: fdf9459f-6ed8-4812-b490-8f5fa136ba6d. Source: http://collections.ala.org.au/public/show/dr340 (source published on 2015-01-07)
Australian Museum. Australian Museum provider for OZCAM. Record ID: addf497a-fd3a-4f6a-95b7-8150ed5cf7e3. Source: http://collections.ala.org.au/public/show/dr340 (source published on 2015-01-07)
Australian Museum. Australian Museum provider for OZCAM. Record ID: 2c93d36b-9a81-46e9-ad82-cac8827c3e3d. Source: http://collections.ala.org.au/public/show/dr340 (source published on 2015-01-07)
Australian Museum. Australian Museum provider for OZCAM. Record ID: 11e6ed21-8f25-4f0c-aaff-e72e8f51ac77. Source: http://collections.ala.org.au/public/show/dr340 (source published on 2015-01-07)
Australian Museum. Australian Museum provider for OZCAM. Record ID: 0ec3a4e7-bf4a-4b38-9816-1a89560b4964. Source: http://collections.ala.org.au/public/show/dr340 (source published on 2015-01-07)
Australian Museum. Australian Museum provider for OZCAM. Record ID: aba3cf42-fc36-4308-8970-98ca58f628f8. Source: http://collections.ala.org.au/public/show/dr340 (source published on 2015-01-07)
Australian Museum. Australian Museum provider for OZCAM. Record ID: bd9159b9-ebcf-4006-9130-84944fbcfdcf. Source: http://collections.ala.org.au/public/show/dr340 (source published on 2015-01-07)
Australian Museum. Australian Museum provider for OZCAM. Record ID: f9e59b36-965c-4b4d-aacd-16bf2e67d639. Source: http://collections.ala.org.au/public/show/dr340 (source published on 2015-01-07)
Australian Museum. Australian Museum provider for OZCAM. Record ID: 352b207a-5675-4489-99e6-aaf88d8a37b9. Source: http://collections.ala.org.au/public/show/dr340 (source published on 2015-01-07)
Australian Museum. Australian Museum provider for OZCAM. Record ID: 87ddeeaa-4f0e-40e3-a4f9-aafaaa15b55c. Source: http://collections.ala.org.au/public/show/dr340 (source published on 2015-01-07)
Australian Museum. Australian Museum provider for OZCAM. Record ID: dc7136f4-2e7a-4d05-80bf-01b93aeb8c27. Source: http://collections.ala.org.au/public/show/dr340 (source published on 2015-01-07)
Australian Museum. Australian Museum provider for OZCAM. Record ID: 8f3acc37-f074-49a9-bcc4-0c791d23121d. Source: http://collections.ala.org.au/public/show/dr340 (source published on 2015-01-07)
Australian Museum. Australian Museum provider for OZCAM. Record ID: 09fb0bd8-6cdd-4c94-ae9f-2fb7c76fe96a. Source: http://collections.ala.org.au/public/show/dr340 (source published on 2015-01-07)
Australian Museum. Australian Museum provider for OZCAM. Record ID: 0c96b8d7-0046-46e9-aad0-fd7f6c414b58. Source: http://collections.ala.org.au/public/show/dr340 (source published on 2015-01-07)
Australian Museum. Australian Museum provider for OZCAM. Record ID: 3c46600b-ba8c-4282-a244-6264a920a6fd. Source: http://collections.ala.org.au/public/show/dr340 (source published on 2015-01-07)
Australian Museum. Australian Museum provider for OZCAM. Record ID: 6baf3e92-5fb1-43b4-abee-42f92e8a0ede. Source: http://collections.ala.org.au/public/show/dr340 (source published on 2015-01-07)
Australian Museum. Australian Museum provider for OZCAM. Record ID: 738b200b-ae98-44f1-bef1-02545979f134. Source: http://collections.ala.org.au/public/show/dr340 (source published on 2015-01-07)
Australian Museum. Australian Museum provider for OZCAM. Record ID: 9d66a5b0-ccbc-4003-83e6-8692d3d7c45c. Source: http://collections.ala.org.au/public/show/dr340 (source published on 2015-01-07)
Australian Museum. Australian Museum provider for OZCAM. Record ID: a14ec214-adb2-486f-b97c-5341984e0963. Source: http://collections.ala.org.au/public/show/dr340 (source published on 2015-01-07)
Australian Museum. Australian Museum provider for OZCAM. Record ID: f1ac9d53-80b8-4943-a5de-ec10c459bc63. Source: http://collections.ala.org.au/public/show/dr340 (source published on 2015-01-07)
Australian Museum. Australian Museum provider for OZCAM. Record ID: fc88cc28-9221-422f-aad7-9c66f5446209. Source: http://collections.ala.org.au/public/show/dr340 (source published on 2015-01-07)
Australian Museum. Australian Museum provider for OZCAM. Record ID: 05d16c68-c3e1-4022-a0d4-bedc05081b83. Source: http://collections.ala.org.au/public/show/dr340 (source published on 2015-01-07)
Australian Museum. Australian Museum provider for OZCAM. Record ID: 3cd31c24-9675-4f5f-9f3f-7ae9c554e1ac. Source: http://collections.ala.org.au/public/show/dr340 (source published on 2015-01-07)
Australian Museum. Australian Museum provider for OZCAM. Record ID: 43e14b00-336b-41af-8847-7f7876d6981a. Source: http://collections.ala.org.au/public/show/dr340 (source published on 2015-01-07)
Australian Museum. Australian Museum provider for OZCAM. Record ID: 925d4e8f-e4eb-4f31-b5aa-d5c11b31ff36. Source: http://collections.ala.org.au/public/show/dr340 (source published on 2015-01-07)
Australian Museum. Australian Museum provider for OZCAM. Record ID: 93773e61-4e32-4b8f-b9e2-441a52fe3887. Source: http://collections.ala.org.au/public/show/dr340 (source published on 2015-01-07)
Australian Museum. Australian Museum provider for OZCAM. Record ID: 9abb7c6c-f24a-402a-9142-ab3ed7f36e5e. Source: http://collections.ala.org.au/public/show/dr340 (source published on 2015-01-07)
Australian Museum. Australian Museum provider for OZCAM. Record ID: b4048431-9ef2-442a-84cb-0d3c4832fe4b. Source: http://collections.ala.org.au/public/show/dr340 (source published on 2015-01-07)
Australian Museum. Australian Museum provider for OZCAM. Record ID: c948fca2-9d68-4fb8-a520-747ebf577d24. Source: http://collections.ala.org.au/public/show/dr340 (source published on 2015-01-07)
Australian Museum. Australian Museum provider for OZCAM. Record ID: d6e0838f-7e27-4a26-b323-7138543fe364. Source: http://collections.ala.org.au/public/show/dr340 (source published on 2015-01-07)
Australian Museum. Australian Museum provider for OZCAM. Record ID: faa78623-ed3f-4c50-b6ea-853f11e8dc99. Source: http://collections.ala.org.au/public/show/dr340 (source published on 2015-01-07)
Australian Museum. Australian Museum provider for OZCAM. Record ID: 0031f881-c67f-480e-a609-e5b1b811d823. Source: http://collections.ala.org.au/public/show/dr340 (source published on 2015-01-07)
Australian Museum. Australian Museum provider for OZCAM. Record ID: 40a5dab9-c503-40c8-a6a6-e5a3b1393bf6. Source: http://collections.ala.org.au/public/show/dr340 (source published on 2015-01-07)
Australian Museum. Australian Museum provider for OZCAM. Record ID: 48ee0338-dc03-4583-b328-d94dad05c8b8. Source: http://collections.ala.org.au/public/show/dr340 (source published on 2015-01-07)
Australian Museum. Australian Museum provider for OZCAM. Record ID: 0211267f-a4cd-48e2-93f4-24cbdcbddf21. Source: http://collections.ala.org.au/public/show/dr340 (source published on 2015-01-07)
Australian Museum. Australian Museum provider for OZCAM. Record ID: 2df5d0ca-864b-4df8-96bc-c6ca73112a25. Source: http://collections.ala.org.au/public/show/dr340 (source published on 2015-01-07)
Australian Museum. Australian Museum provider for OZCAM. Record ID: 9e128862-67c3-4a88-b5be-6da859d827a9. Source: http://collections.ala.org.au/public/show/dr340 (source published on 2015-01-07)
Australian Museum. Australian Museum provider for OZCAM. Record ID: 34e440e5-2e0e-40b9-babe-f924f570cdef. Source: http://collections.ala.org.au/public/show/dr340 (source published on 2015-01-07)
Australian Museum. Australian Museum provider for OZCAM. Record ID: 7c9381ef-07d4-4d76-8099-71d3c6c558df. Source: http://collections.ala.org.au/public/show/dr340 (source published on 2015-01-07)
Australian Museum. Australian Museum provider for OZCAM. Record ID: b5f69135-989a-4ae3-aa16-36c070dca0f3. Source: http://collections.ala.org.au/public/show/dr340 (source published on 2015-01-07)
Australian Museum. Australian Museum provider for OZCAM. Record ID: fee52675-f125-48f2-9fc1-0095b5aeb3b8. Source: http://collections.ala.org.au/public/show/dr340 (source published on 2015-01-07)
Australian Museum. Australian Museum provider for OZCAM. Record ID: 3294101e-9b94-4dee-9dc4-d6d5be6f9bac. Source: http://collections.ala.org.au/public/show/dr340 (source published on 2015-01-07)
Australian Museum. Australian Museum provider for OZCAM. Record ID: e1f8d0cc-7d82-4e73-aef8-1e4b10147321. Source: http://collections.ala.org.au/public/show/dr340 (source published on 2015-01-07)
Australian Museum. Australian Museum provider for OZCAM. Record ID: 9482d5ef-553e-4097-b5a8-7ce2e7230da9. Source: http://collections.ala.org.au/public/show/dr340 (source published on 2015-01-07)
Australian Museum. Australian Museum provider for OZCAM. Record ID: faaac5f5-bba5-46e1-80b3-fccfbcca59b1. Source: http://collections.ala.org.au/public/show/dr340 (source published on 2015-01-07)
Australian Museum. Australian Museum provider for OZCAM. Record ID: 9e5cc6d1-9f70-441b-9969-a7eb99bc01ad. Source: http://collections.ala.org.au/public/show/dr340 (source published on 2015-01-07)
Australian Museum. Australian Museum provider for OZCAM. Record ID: ba4f45e8-00b8-432a-9733-270f6910ca80. Source: http://collections.ala.org.au/public/show/dr340 (source published on 2015-01-07)
Australian Museum. Australian Museum provider for OZCAM. Record ID: 725996dc-5df2-4c8c-8f2c-b22650b29baa. Source: http://collections.ala.org.au/public/show/dr340 (source published on 2015-01-07)
Australian Museum. Australian Museum provider for OZCAM. Record ID: 863adbee-83ca-4ad4-8fd7-da94843215e0. Source: http://collections.ala.org.au/public/show/dr340 (source published on 2015-01-07)
Australian Museum. Australian Museum provider for OZCAM. Record ID: 86bd7d15-a21b-4d5a-bb6f-8282b6879894. Source: http://collections.ala.org.au/public/show/dr340 (source published on 2015-01-07)
Australian Museum. Australian Museum provider for OZCAM. Record ID: 1c49b8ae-20ef-47eb-8881-a4d5d90d603e. Source: http://collections.ala.org.au/public/show/dr340 (source published on 2015-01-07)
Australian Museum. Australian Museum provider for OZCAM. Record ID: 40c1a677-95d1-4cc4-bb13-2967f7142a68. Source: http://collections.ala.org.au/public/show/dr340 (source published on 2015-01-07)
Australian Museum. Australian Museum provider for OZCAM. Record ID: 546b6cd9-6a9f-4ce9-8209-33171b20c66e. Source: http://collections.ala.org.au/public/show/dr340 (source published on 2015-01-07)
Australian Museum. Australian Museum provider for OZCAM. Record ID: 8784eb15-57db-448d-9cfd-9040467c6613. Source: http://collections.ala.org.au/public/show/dr340 (source published on 2015-01-07)
Australian Museum. Australian Museum provider for OZCAM. Record ID: aad93e8c-6a35-450d-8754-0955b14d8a40. Source: http://collections.ala.org.au/public/show/dr340 (source published on 2015-01-07)
Australian Museum. Australian Museum provider for OZCAM. Record ID: 1e031aff-d8a0-44af-92a3-867ea4fe1135. Source: http://collections.ala.org.au/public/show/dr340 (source published on 2015-01-07)
Australian Museum. Australian Museum provider for OZCAM. Record ID: 632a62aa-8337-412f-acbc-a0d572e6701b. Source: http://collections.ala.org.au/public/show/dr340 (source published on 2015-01-07)
Australian Museum. Australian Museum provider for OZCAM. Record ID: 5221474f-52aa-43c1-89c0-4aa33f5ed8f6. Source: http://collections.ala.org.au/public/show/dr340 (source published on 2015-01-07)
Australian Museum. Australian Museum provider for OZCAM. Record ID: fc1bdc2e-1649-4ce7-91ff-f363e04f6944. Source: http://collections.ala.org.au/public/show/dr340 (source published on 2015-01-07)
Australian Museum. Australian Museum provider for OZCAM. Record ID: b11f7537-da48-495b-851a-24cecc972bee. Source: http://collections.ala.org.au/public/show/dr340 (source published on 2015-01-07)
Australian Museum. Australian Museum provider for OZCAM. Record ID: 1cb861ec-56e2-4593-a2f7-391d4751eb59. Source: http://collections.ala.org.au/public/show/dr340 (source published on 2015-01-07)
Australian Museum. Australian Museum provider for OZCAM. Record ID: 7fecaa4f-441b-4186-bfdb-df06cd23d62b. Source: http://collections.ala.org.au/public/show/dr340 (source published on 2015-01-07)
Australian Museum. Australian Museum provider for OZCAM. Record ID: f9a9dfd6-13e7-4912-a0ca-a0bea1aa766b. Source: http://collections.ala.org.au/public/show/dr340 (source published on 2015-01-07)
Australian Museum. Australian Museum provider for OZCAM. Record ID: f9bee9d2-6401-4131-a43b-e978ab4c061d. Source: http://collections.ala.org.au/public/show/dr340 (source published on 2015-01-07)
Australian Museum. Australian Museum provider for OZCAM. Record ID: a516bf41-d19d-4834-ae11-2c1acacb16e0. Source: http://collections.ala.org.au/public/show/dr340 (source published on 2015-01-07)
Australian Museum. Australian Museum provider for OZCAM. Record ID: 1f5ae19f-8474-4e99-a3ce-8d8c37aa7f41. Source: http://collections.ala.org.au/public/show/dr340 (source published on 2015-01-07)
Australian Museum. Australian Museum provider for OZCAM. Record ID: 1aca3639-a6d4-464a-9cb7-dc6d05f9a2a2. Source: http://collections.ala.org.au/public/show/dr340 (source published on 2015-01-07)
Australian Museum. Australian Museum provider for OZCAM. Record ID: 1d823530-1fb6-4e62-8ef2-77a7aeaa5ca5. Source: http://collections.ala.org.au/public/show/dr340 (source published on 2015-01-07)
Australian Museum. Australian Museum provider for OZCAM. Record ID: 4c880299-ddb7-44ce-8207-befbfca55ac8. Source: http://collections.ala.org.au/public/show/dr340 (source published on 2015-01-07)
Australian Museum. Australian Museum provider for OZCAM. Record ID: 9da0225d-7b39-4ab9-88c9-5507cd2e58c1. Source: http://collections.ala.org.au/public/show/dr340 (source published on 2015-01-07)
Australian Museum. Australian Museum provider for OZCAM. Record ID: 663e9b56-ba6a-437a-8831-eaaced26bbe8. Source: http://collections.ala.org.au/public/show/dr340 (source published on 2015-01-07)
Australian Museum. Australian Museum provider for OZCAM. Record ID: 7b0e2130-26f6-4afd-afab-550ec72b872f. Source: http://collections.ala.org.au/public/show/dr340 (source published on 2015-01-07)
Australian Museum. Australian Museum provider for OZCAM. Record ID: 30b6b580-d03d-4720-892f-e6f22c64c2ff. Source: http://collections.ala.org.au/public/show/dr340 (source published on 2015-01-07)
Australian Museum. Australian Museum provider for OZCAM. Record ID: 1f7bbb67-afc1-42d3-a2ff-da23e4a2fdbb. Source: http://collections.ala.org.au/public/show/dr340 (source published on 2015-01-07)
Australian Museum. Australian Museum provider for OZCAM. Record ID: 0be3e584-19ca-436c-995c-acf46f12ca73. Source: http://collections.ala.org.au/public/show/dr340 (source published on 2015-01-07)
Australian Museum. Australian Museum provider for OZCAM. Record ID: 701009c2-12be-4846-8537-76889a60c01b. Source: http://collections.ala.org.au/public/show/dr340 (source published on 2015-01-07)
Australian Museum. Australian Museum provider for OZCAM. Record ID: 295c92c2-9bb6-453f-a132-059d188a4e5a. Source: http://collections.ala.org.au/public/show/dr340 (source published on 2015-01-07)
Australian Museum. Australian Museum provider for OZCAM. Record ID: 4703481d-f2b9-4496-87bc-f6ae3af44de1. Source: http://collections.ala.org.au/public/show/dr340 (source published on 2015-01-07)
Australian Museum. Australian Museum provider for OZCAM. Record ID: fd48e617-ae02-41f1-b7f2-ef88ad5078de. Source: http://collections.ala.org.au/public/show/dr340 (source published on 2015-01-07)
Australian Museum. Australian Museum provider for OZCAM. Record ID: add6aa15-e3e7-484e-af10-475402ddd0f6. Source: http://collections.ala.org.au/public/show/dr340 (source published on 2015-01-07)
Australian Museum. Australian Museum provider for OZCAM. Record ID: 5ff723db-2921-46da-afd1-47481dd95b2e. Source: http://collections.ala.org.au/public/show/dr340 (source published on 2015-01-07)
Australian Museum. Australian Museum provider for OZCAM. Record ID: 9f1d4dc1-4ae0-4ad3-925f-c6e998e67bd1. Source: http://collections.ala.org.au/public/show/dr340 (source published on 2015-01-07)
Australian Museum. Australian Museum provider for OZCAM. Record ID: 2d766f4d-924c-407e-89a7-b1870e5212cf. Source: http://collections.ala.org.au/public/show/dr340 (source published on 2015-01-07)
Australian Museum. Australian Museum provider for OZCAM. Record ID: 7feee922-aeaa-44d3-bb4a-024f6b4e67df. Source: http://collections.ala.org.au/public/show/dr340 (source published on 2015-01-07)
Australian Museum. Australian Museum provider for OZCAM. Record ID: 1ca6226c-7164-4bb4-af8d-43cc173cd55a. Source: http://collections.ala.org.au/public/show/dr340 (source published on 2015-01-07)
Australian Museum. Australian Museum provider for OZCAM. Record ID: cb178bc8-16e0-4a83-938f-9dfe041a0215. Source: http://collections.ala.org.au/public/show/dr340 (source published on 2015-01-07)
Australian Museum. Australian Museum provider for OZCAM. Record ID: d7caad18-d46b-4338-adce-6a151897b6d9. Source: http://collections.ala.org.au/public/show/dr340 (source published on 2015-01-07)
Australian Museum. Australian Museum provider for OZCAM. Record ID: d3f053bf-783f-4cc1-bbac-7f62d884789a. Source: http://collections.ala.org.au/public/show/dr340 (source published on 2015-01-07)
Australian Museum. Australian Museum provider for OZCAM. Record ID: 9794922a-9780-4722-b854-9bbb5fe2d647. Source: http://collections.ala.org.au/public/show/dr340 (source published on 2015-01-07)
Australian Museum. Australian Museum provider for OZCAM. Record ID: 4ab51154-5763-4609-bc7b-91e10ad3b3d4. Source: http://collections.ala.org.au/public/show/dr340 (source published on 2015-01-07)
Australian Museum. Australian Museum provider for OZCAM. Record ID: 3ed351df-2a0c-4e21-9f73-af8f2f44e534. Source: http://collections.ala.org.au/public/show/dr340 (source published on 2015-01-07)
Australian Museum. Australian Museum provider for OZCAM. Record ID: b84b7c81-ecf6-4663-8274-d03e3cc0ec4a. Source: http://collections.ala.org.au/public/show/dr340 (source published on 2015-01-07)
Australian Museum. Australian Museum provider for OZCAM. Record ID: c841f6b5-26a7-49f4-ada7-ff08fcfcdda1. Source: http://collections.ala.org.au/public/show/dr340 (source published on 2015-01-07)
Australian Museum. Australian Museum provider for OZCAM. Record ID: 8c23cb8d-6f7b-448b-b278-58218d4255e6. Source: http://collections.ala.org.au/public/show/dr340 (source published on 2015-01-07)
Australian Museum. Australian Museum provider for OZCAM. Record ID: 42f42dc1-ca3e-4632-844e-6a10b0dc141b. Source: http://collections.ala.org.au/public/show/dr340 (source published on 2015-01-07)
Australian Museum. Australian Museum provider for OZCAM. Record ID: 18a238d3-733b-495b-9a03-16c7eb59a190. Source: http://collections.ala.org.au/public/show/dr340 (source published on 2015-01-07)
Australian Museum. Australian Museum provider for OZCAM. Record ID: c9c470a3-3a11-4f5b-9b9d-a3ef0236a653. Source: http://collections.ala.org.au/public/show/dr340 (source published on 2015-01-07)
Australian Museum. Australian Museum provider for OZCAM. Record ID: b2fc6ae6-3f4d-463f-be7c-de799d64f73b. Source: http://collections.ala.org.au/public/show/dr340 (source published on 2015-01-07)
Australian Museum. Australian Museum provider for OZCAM. Record ID: ce99372a-e32f-42cf-98e4-8290bb398dba. Source: http://collections.ala.org.au/public/show/dr340 (source published on 2015-01-07)
Australian Museum. Australian Museum provider for OZCAM. Record ID: 7112c589-07f6-4431-ac17-396d76e61422. Source: http://collections.ala.org.au/public/show/dr340 (source published on 2015-01-07)
Australian Museum. Australian Museum provider for OZCAM. Record ID: 8b82a5c2-db06-41be-b334-1335216ad06b. Source: http://collections.ala.org.au/public/show/dr340 (source published on 2015-01-07)
Australian Museum. Australian Museum provider for OZCAM. Record ID: 4acfb298-5bce-4565-a453-e3b00aa845c1. Source: http://collections.ala.org.au/public/show/dr340 (source published on 2015-01-07)
Australian Museum. Australian Museum provider for OZCAM. Record ID: bc2feec2-155b-4c77-be58-b66d8ff16237. Source: http://collections.ala.org.au/public/show/dr340 (source published on 2015-01-07)
Australian Museum. Australian Museum provider for OZCAM. Record ID: a3181e03-c880-41d8-b947-d08703f0d584. Source: http://collections.ala.org.au/public/show/dr340 (source published on 2015-01-07)
Australian Museum. Australian Museum provider for OZCAM. Record ID: 633a4820-d418-40fa-9640-a3dd435fa197. Source: http://collections.ala.org.au/public/show/dr340 (source published on 2015-01-07)
Australian Museum. Australian Museum provider for OZCAM. Record ID: 9be90fd0-998a-407f-b57b-4ffa145a3e6e. Source: http://collections.ala.org.au/public/show/dr340 (source published on 2015-01-07)
Australian Museum. Australian Museum provider for OZCAM. Record ID: a2d7637a-189d-4eff-81ad-1d79540b50c4. Source: http://collections.ala.org.au/public/show/dr340 (source published on 2015-01-07)
Australian Museum. Australian Museum provider for OZCAM. Record ID: f6105f1d-239b-4b5c-8599-518d508afca9. Source: http://collections.ala.org.au/public/show/dr340 (source published on 2015-01-07)
Australian Museum. Australian Museum provider for OZCAM. Record ID: 96125fd7-8574-44df-9d23-cd7c0b2a4cf3. Source: http://collections.ala.org.au/public/show/dr340 (source published on 2015-01-07)
Australian Museum. Australian Museum provider for OZCAM. Record ID: 640658b4-137e-4512-8412-85aa5189e510. Source: http://collections.ala.org.au/public/show/dr340 (source published on 2015-01-07)
Australian Museum. Australian Museum provider for OZCAM. Record ID: f7141f19-fa6b-44c7-b2bc-4a8e16b90a4e. Source: http://collections.ala.org.au/public/show/dr340 (source published on 2015-01-07)
Australian Museum. Australian Museum provider for OZCAM. Record ID: 757aa177-3958-4a10-ab3e-3f4c3eb08bbc. Source: http://collections.ala.org.au/public/show/dr340 (source published on 2015-01-07)
Australian Museum. Australian Museum provider for OZCAM. Record ID: 9c8557ad-f844-4a19-aaf9-595a9428f052. Source: http://collections.ala.org.au/public/show/dr340 (source published on 2015-01-07)
Australian Museum. Australian Museum provider for OZCAM. Record ID: f585dc32-31b0-4654-8eb8-8956301fec89. Source: http://collections.ala.org.au/public/show/dr340 (source published on 2015-01-07)
Australian Museum. Australian Museum provider for OZCAM. Record ID: e3a585b7-6bcf-46f6-b698-87d5a61eb4df. Source: http://collections.ala.org.au/public/show/dr340 (source published on 2015-01-07)
Australian Museum. Australian Museum provider for OZCAM. Record ID: 436cc998-76ef-45aa-8204-53d4dc91ada7. Source: http://collections.ala.org.au/public/show/dr340 (source published on 2015-01-07)
Australian Museum. Australian Museum provider for OZCAM. Record ID: 15b54b61-5501-4c6c-b081-2e5f1a8d29d4. Source: http://collections.ala.org.au/public/show/dr340 (source published on 2015-01-07)
Australian Museum. Australian Museum provider for OZCAM. Record ID: f2c39d1c-e408-4062-9a53-85441371e875. Source: http://collections.ala.org.au/public/show/dr340 (source published on 2015-01-07)
Australian Museum. Australian Museum provider for OZCAM. Record ID: 4c54ba67-41d5-43f4-b759-73fa456c7630. Source: http://collections.ala.org.au/public/show/dr340 (source published on 2015-01-07)
Australian Museum. Australian Museum provider for OZCAM. Record ID: 5d85ac91-d9b9-439e-9af5-e9eee9362f3e. Source: http://collections.ala.org.au/public/show/dr340 (source published on 2015-01-07)
Australian Museum. Australian Museum provider for OZCAM. Record ID: 4765ea02-5b47-4fc9-8db4-0446ffcd490a. Source: http://collections.ala.org.au/public/show/dr340 (source published on 2015-01-07)
Australian Museum. Australian Museum provider for OZCAM. Record ID: 62851518-12ff-4331-9975-0a04d19f810c. Source: http://collections.ala.org.au/public/show/dr340 (source published on 2015-01-07)
Australian Museum. Australian Museum provider for OZCAM. Record ID: 747d62c7-9e9e-4dc5-9b12-faa187b7d7c1. Source: http://collections.ala.org.au/public/show/dr340 (source published on 2015-01-07)
Australian Museum. Australian Museum provider for OZCAM. Record ID: ef78bb51-57e0-4b6f-a3bf-ab2a55e30133. Source: http://collections.ala.org.au/public/show/dr340 (source published on 2015-01-07)
Australian Museum. Australian Museum provider for OZCAM. Record ID: 7bfd6565-a428-4ca8-85c6-f50861fdaaa4. Source: http://collections.ala.org.au/public/show/dr340 (source published on 2015-01-07)
Australian Museum. Australian Museum provider for OZCAM. Record ID: 06d8b433-6ed5-41b0-afbc-b81fda942dfd. Source: http://collections.ala.org.au/public/show/dr340 (source published on 2015-01-07)
Australian Museum. Australian Museum provider for OZCAM. Record ID: f0cb57a7-c68f-433b-aebe-5ef20b82d779. Source: http://collections.ala.org.au/public/show/dr340 (source published on 2015-01-07)
Australian Museum. Australian Museum provider for OZCAM. Record ID: 36988fe3-ed44-42f8-bb98-9ded84473168. Source: http://collections.ala.org.au/public/show/dr340 (source published on 2015-01-07)
Australian Museum. Australian Museum provider for OZCAM. Record ID: 6ccc9033-7b19-4fc6-9814-e18ee5567fa4. Source: http://collections.ala.org.au/public/show/dr340 (source published on 2015-01-07)
Australian Museum. Australian Museum provider for OZCAM. Record ID: 723c91a8-7262-4713-827f-433ca366e35d. Source: http://collections.ala.org.au/public/show/dr340 (source published on 2015-01-07)
Australian Museum. Australian Museum provider for OZCAM. Record ID: f6c09b29-000e-4ec9-9c73-9dd67b27f9f0. Source: http://collections.ala.org.au/public/show/dr340 (source published on 2015-01-07)
Australian Museum. Australian Museum provider for OZCAM. Record ID: 39932d4e-8a14-479a-812b-75585858049d. Source: http://collections.ala.org.au/public/show/dr340 (source published on 2015-01-07)
Australian Museum. Australian Museum provider for OZCAM. Record ID: dde8a0ea-f115-4a87-ae5b-03ad1b556ee6. Source: http://collections.ala.org.au/public/show/dr340 (source published on 2015-01-07)
Australian Museum. Australian Museum provider for OZCAM. Record ID: a2324fa0-2d88-42e1-9830-e59eb9e3dc8f. Source: http://collections.ala.org.au/public/show/dr340 (source published on 2015-01-07)
Australian Museum. Australian Museum provider for OZCAM. Record ID: faa861cc-c276-45f1-9c8a-0595737f7dd8. Source: http://collections.ala.org.au/public/show/dr340 (source published on 2015-01-07)
Australian Museum. Australian Museum provider for OZCAM. Record ID: 38748862-07d6-4eb3-bab8-6f99788bf468. Source: http://collections.ala.org.au/public/show/dr340 (source published on 2015-01-07)
Australian Museum. Australian Museum provider for OZCAM. Record ID: e3c37ac6-36b0-4381-b58d-3266ebf0d9a3. Source: http://collections.ala.org.au/public/show/dr340 (source published on 2015-01-07)
Australian Museum. Australian Museum provider for OZCAM. Record ID: 702d32b9-dee3-47dd-9afd-0aad66efebad. Source: http://collections.ala.org.au/public/show/dr340 (source published on 2015-01-07)
Australian Museum. Australian Museum provider for OZCAM. Record ID: ba46a1e4-71a6-411e-86b3-aac2ca3f3cf6. Source: http://collections.ala.org.au/public/show/dr340 (source published on 2015-01-07)
Australian Museum. Australian Museum provider for OZCAM. Record ID: 1f4851f5-3a9c-42f7-8952-56cce380af91. Source: http://collections.ala.org.au/public/show/dr340 (source published on 2015-01-07)
Australian Museum. Australian Museum provider for OZCAM. Record ID: 50de169c-532a-4d36-9177-dcaace09e2e8. Source: http://collections.ala.org.au/public/show/dr340 (source published on 2015-01-07)
Australian Museum. Australian Museum provider for OZCAM. Record ID: 954d0ca6-52a7-4162-874a-cfe555a5a9fd. Source: http://collections.ala.org.au/public/show/dr340 (source published on 2015-01-07)
Australian Museum. Australian Museum provider for OZCAM. Record ID: 9755db5c-c191-4706-8e6f-fe81233a5707. Source: http://collections.ala.org.au/public/show/dr340 (source published on 2015-01-07)
Australian Museum. Australian Museum provider for OZCAM. Record ID: 01b37d7a-3f14-4586-b161-60161b3f5b3b. Source: http://collections.ala.org.au/public/show/dr340 (source published on 2015-01-07)
Australian Museum. Australian Museum provider for OZCAM. Record ID: 6dfed2fa-79db-416c-b6dd-f721137bcc97. Source: http://collections.ala.org.au/public/show/dr340 (source published on 2015-01-07)
Australian Museum. Australian Museum provider for OZCAM. Record ID: ad6a7059-2fcf-4ab3-a80e-7ccd4dae495e. Source: http://collections.ala.org.au/public/show/dr340 (source published on 2015-01-07)
Australian Museum. Australian Museum provider for OZCAM. Record ID: 015f77f1-e506-44ab-93fa-c4f4dde13037. Source: http://collections.ala.org.au/public/show/dr340 (source published on 2015-01-07)
Australian Museum. Australian Museum provider for OZCAM. Record ID: 935d1fee-b526-4abb-980f-cd7ba13873a8. Source: http://collections.ala.org.au/public/show/dr340 (source published on 2015-01-07)
Australian Museum. Australian Museum provider for OZCAM. Record ID: d0ffb0ea-dd31-4bc1-9171-07a0876dd78b. Source: http://collections.ala.org.au/public/show/dr340 (source published on 2015-01-07)
Australian Museum. Australian Museum provider for OZCAM. Record ID: 3ecaa620-a98b-4fb5-8175-aed27b2295a3. Source: http://collections.ala.org.au/public/show/dr340 (source published on 2015-01-07)
Australian Museum. Australian Museum provider for OZCAM. Record ID: fecc8c2c-5c32-45cc-b69c-dfae4d6858a0. Source: http://collections.ala.org.au/public/show/dr340 (source published on 2015-01-07)
Australian Museum. Australian Museum provider for OZCAM. Record ID: d773470e-4238-44c0-b9b8-844e8d36ca83. Source: http://collections.ala.org.au/public/show/dr340 (source published on 2015-01-07)
Australian Museum. Australian Museum provider for OZCAM. Record ID: fae835a1-f8b1-4cd6-9840-27b32b6380ed. Source: http://collections.ala.org.au/public/show/dr340 (source published on 2015-01-07)
Australian Museum. Australian Museum provider for OZCAM. Record ID: 382365b9-82ae-4951-acd6-8071b1da0d5f. Source: http://collections.ala.org.au/public/show/dr340 (source published on 2015-01-07)
Australian Museum. Australian Museum provider for OZCAM. Record ID: e86dd2f9-9216-41ea-856e-b1f9e5ddfc66. Source: http://collections.ala.org.au/public/show/dr340 (source published on 2015-01-07)
Australian Museum. Australian Museum provider for OZCAM. Record ID: f2d004c9-97b0-4205-8e0e-d0f389135abc. Source: http://collections.ala.org.au/public/show/dr340 (source published on 2015-01-07)
Australian Museum. Australian Museum provider for OZCAM. Record ID: 0417b326-09a2-4bbb-a75d-2c8df49c0ae5. Source: http://collections.ala.org.au/public/show/dr340 (source published on 2015-01-07)
Australian Museum. Australian Museum provider for OZCAM. Record ID: 6d7d8ec6-ecd9-47ed-8ad2-39f7d867ea93. Source: http://collections.ala.org.au/public/show/dr340 (source published on 2015-01-07)
Australian Museum. Australian Museum provider for OZCAM. Record ID: d9662390-b63e-47b6-8440-1a66fa393398. Source: http://collections.ala.org.au/public/show/dr340 (source published on 2015-01-07)
Australian Museum. Australian Museum provider for OZCAM. Record ID: 0c53ba87-aa1a-422f-9197-9a43ef6cec0a. Source: http://collections.ala.org.au/public/show/dr340 (source published on 2015-01-07)
Australian Museum. Australian Museum provider for OZCAM. Record ID: ba232f19-0ca2-42f5-922b-29f1293dcee0. Source: http://collections.ala.org.au/public/show/dr340 (source published on 2015-01-07)
Australian Museum. Australian Museum provider for OZCAM. Record ID: e6cb9cea-5062-4355-a2cf-dbd0207fa049. Source: http://collections.ala.org.au/public/show/dr340 (source published on 2015-01-07)
Australian Museum. Australian Museum provider for OZCAM. Record ID: 072f6ebd-267f-4c1f-ad9b-83daad1765fe. Source: http://collections.ala.org.au/public/show/dr340 (source published on 2015-01-07)
Australian Museum. Australian Museum provider for OZCAM. Record ID: 86cee38d-30bf-4c99-9a4e-5dc804da7bf1. Source: http://collections.ala.org.au/public/show/dr340 (source published on 2015-01-07)
Australian Museum. Australian Museum provider for OZCAM. Record ID: 2760e8fe-2163-4036-96e8-af12976e0160. Source: http://collections.ala.org.au/public/show/dr340 (source published on 2015-01-07)
Australian Museum. Australian Museum provider for OZCAM. Record ID: 98576d66-c226-4db8-ab67-3c7f6e3d06d9. Source: http://collections.ala.org.au/public/show/dr340 (source published on 2015-01-07)
Australian Museum. Australian Museum provider for OZCAM. Record ID: fc0e7afc-03ef-4088-be5c-e4f1fffbb7cb. Source: http://collections.ala.org.au/public/show/dr340 (source published on 2015-01-07)
Australian Museum. Australian Museum provider for OZCAM. Record ID: c35756c1-03a7-44d0-ace9-72e7b19c2164. Source: http://collections.ala.org.au/public/show/dr340 (source published on 2015-01-07)
Australian Museum. Australian Museum provider for OZCAM. Record ID: 4210c85d-85fa-49db-8fe8-835d535fe21f. Source: http://collections.ala.org.au/public/show/dr340 (source published on 2015-01-07)
Australian Museum. Australian Museum provider for OZCAM. Record ID: 6c16f966-f34d-4622-b82e-9e96ce742324. Source: http://collections.ala.org.au/public/show/dr340 (source published on 2015-01-07)
Australian Museum. Australian Museum provider for OZCAM. Record ID: b8c83ad5-c1bb-416a-81b2-ad61a9dec752. Source: http://collections.ala.org.au/public/show/dr340 (source published on 2015-01-07)
Australian Museum. Australian Museum provider for OZCAM. Record ID: 27e69228-14b4-47a6-be3d-af8a18409936. Source: http://collections.ala.org.au/public/show/dr340 (source published on 2015-01-07)
Australian Museum. Australian Museum provider for OZCAM. Record ID: bee8b058-847a-4af0-b3bd-7c4086245fa0. Source: http://collections.ala.org.au/public/show/dr340 (source published on 2015-01-07)
Australian Museum. Australian Museum provider for OZCAM. Record ID: e24a9c33-ddc8-48d6-9a87-277d1d725f9d. Source: http://collections.ala.org.au/public/show/dr340 (source published on 2015-01-07)
Australian Museum. Australian Museum provider for OZCAM. Record ID: 1ecc6c24-bf83-413a-9591-d491228f7640. Source: http://collections.ala.org.au/public/show/dr340 (source published on 2015-01-07)
Australian Museum. Australian Museum provider for OZCAM. Record ID: 809e7c4e-6429-4881-a31f-5209bbbacb1c. Source: http://collections.ala.org.au/public/show/dr340 (source published on 2015-01-07)
Australian Museum. Australian Museum provider for OZCAM. Record ID: 4f70a44e-9a29-45ed-a894-64802e2783e1. Source: http://collections.ala.org.au/public/show/dr340 (source published on 2015-01-07)
Australian Museum. Australian Museum provider for OZCAM. Record ID: 090bd822-8193-41b7-8e1d-c4d67a92a2db. Source: http://collections.ala.org.au/public/show/dr340 (source published on 2015-01-07)
Australian Museum. Australian Museum provider for OZCAM. Record ID: 6bacaaee-e562-4d94-8f87-46b1a68b5f5a. Source: http://collections.ala.org.au/public/show/dr340 (source published on 2015-01-07)
Australian Museum. Australian Museum provider for OZCAM. Record ID: f66eaba8-5a12-4bda-a2e5-7e0e21661572. Source: http://collections.ala.org.au/public/show/dr340 (source published on 2015-01-07)
Australian Museum. Australian Museum provider for OZCAM. Record ID: 6628dea0-a546-4240-9006-395db8a12a53. Source: http://collections.ala.org.au/public/show/dr340 (source published on 2015-01-07)
Australian Museum. Australian Museum provider for OZCAM. Record ID: 946e442a-312a-4df0-a70f-68408ece4313. Source: http://collections.ala.org.au/public/show/dr340 (source published on 2015-01-07)
Australian Museum. Australian Museum provider for OZCAM. Record ID: e1c5a6c8-6343-4676-8358-8015d99bf91c. Source: http://collections.ala.org.au/public/show/dr340 (source published on 2015-01-07)
Australian Museum. Australian Museum provider for OZCAM. Record ID: d6ac5f68-4580-46c0-9142-37cd53e6d77b. Source: http://collections.ala.org.au/public/show/dr340 (source published on 2015-01-07)
Australian Museum. Australian Museum provider for OZCAM. Record ID: 1529b550-0478-4cde-b8f7-297ed3086364. Source: http://collections.ala.org.au/public/show/dr340 (source published on 2015-01-07)
Australian Museum. Australian Museum provider for OZCAM. Record ID: 034d067f-99ef-4390-9840-5c496854cabd. Source: http://collections.ala.org.au/public/show/dr340 (source published on 2015-01-07)
Australian Museum. Australian Museum provider for OZCAM. Record ID: 53d11f11-a42d-488a-bdd0-c91292a4ee9b. Source: http://collections.ala.org.au/public/show/dr340 (source published on 2015-01-07)
Australian Museum. Australian Museum provider for OZCAM. Record ID: 61e7c713-d31a-48c9-9505-f6c027d7067a. Source: http://collections.ala.org.au/public/show/dr340 (source published on 2015-01-07)
Australian Museum. Australian Museum provider for OZCAM. Record ID: 398f41b4-4a07-4530-b3f5-ad90ef4d8b92. Source: http://collections.ala.org.au/public/show/dr340 (source published on 2015-01-07)
Australian Museum. Australian Museum provider for OZCAM. Record ID: 6281eee5-e92f-44fc-801a-3404fffb7668. Source: http://collections.ala.org.au/public/show/dr340 (source published on 2015-01-07)
Australian Museum. Australian Museum provider for OZCAM. Record ID: 8d05d748-6c21-4f8f-bd1f-39bc7d6beab8. Source: http://collections.ala.org.au/public/show/dr340 (source published on 2015-01-07)
Australian Museum. Australian Museum provider for OZCAM. Record ID: e8e98b5d-897d-4a36-bcb1-8bd8d8eb9266. Source: http://collections.ala.org.au/public/show/dr340 (source published on 2015-01-07)
Australian Museum. Australian Museum provider for OZCAM. Record ID: 991ad5b0-7d6c-4dcf-bf7d-2d9d77be70ff. Source: http://collections.ala.org.au/public/show/dr340 (source published on 2015-01-07)
Australian Museum. Australian Museum provider for OZCAM. Record ID: 0c8bd335-c1da-4287-b0f5-958260017732. Source: http://collections.ala.org.au/public/show/dr340 (source published on 2015-01-07)
Australian Museum. Australian Museum provider for OZCAM. Record ID: 914a71db-9faf-42a6-8a50-c382009dd142. Source: http://collections.ala.org.au/public/show/dr340 (source published on 2015-01-07)
Australian Museum. Australian Museum provider for OZCAM. Record ID: da34e8d4-6666-420e-90de-faeb4c481cc8. Source: http://collections.ala.org.au/public/show/dr340 (source published on 2015-01-07)
Australian Museum. Australian Museum provider for OZCAM. Record ID: 8bb4d297-c7bf-4ab7-972c-8eb50c2fb2cd. Source: http://collections.ala.org.au/public/show/dr340 (source published on 2015-01-07)
Australian Museum. Australian Museum provider for OZCAM. Record ID: d64136c4-7a27-45d6-b514-f47b23c42c2d. Source: http://collections.ala.org.au/public/show/dr340 (source published on 2015-01-07)
Australian Museum. Australian Museum provider for OZCAM. Record ID: d6f7746f-f748-44af-a879-22a2228372d1. Source: http://collections.ala.org.au/public/show/dr340 (source published on 2015-01-07)
Australian Museum. Australian Museum provider for OZCAM. Record ID: b253c1e6-d978-48dd-a7da-a163b578b076. Source: http://collections.ala.org.au/public/show/dr340 (source published on 2015-01-07)
Australian Museum. Australian Museum provider for OZCAM. Record ID: b536cc3a-2a69-45f7-aefa-a794fc292446. Source: http://collections.ala.org.au/public/show/dr340 (source published on 2015-01-07)
Australian Museum. Australian Museum provider for OZCAM. Record ID: 8ebe9450-7d18-4791-bbba-7eec4f27a9ee. Source: http://collections.ala.org.au/public/show/dr340 (source published on 2015-01-07)
Australian Museum. Australian Museum provider for OZCAM. Record ID: ae03491e-8a99-4fc4-a93a-01fcb580caa4. Source: http://collections.ala.org.au/public/show/dr340 (source published on 2015-01-07)
Australian Museum. Australian Museum provider for OZCAM. Record ID: 041d0a4e-a24b-4a8d-9d15-10818e69f18a. Source: http://collections.ala.org.au/public/show/dr340 (source published on 2015-01-07)
Australian Museum. Australian Museum provider for OZCAM. Record ID: fb98c309-1375-497e-875d-ad2b07c61ad4. Source: http://collections.ala.org.au/public/show/dr340 (source published on 2015-01-07)
Australian Museum. Australian Museum provider for OZCAM. Record ID: 0cbdf96a-21d5-423d-b150-2975a27a857a. Source: http://collections.ala.org.au/public/show/dr340 (source published on 2015-01-07)
Australian Museum. Australian Museum provider for OZCAM. Record ID: 96c2cdc5-eeed-4e85-af61-cfb3a256f47c. Source: http://collections.ala.org.au/public/show/dr340 (source published on 2015-01-07)
Australian Museum. Australian Museum provider for OZCAM. Record ID: f7d0549d-6428-4d98-8b49-45bb2d6450cb. Source: http://collections.ala.org.au/public/show/dr340 (source published on 2015-01-07)
Australian Museum. Australian Museum provider for OZCAM. Record ID: f23a5cf7-9a52-45e2-a7ff-8e19f6596847. Source: http://collections.ala.org.au/public/show/dr340 (source published on 2015-01-07)
Australian Museum. Australian Museum provider for OZCAM. Record ID: 6205f6a7-5dc1-480c-816f-2962b11cabae. Source: http://collections.ala.org.au/public/show/dr340 (source published on 2015-01-07)
Australian Museum. Australian Museum provider for OZCAM. Record ID: bb4b2b01-77f6-497b-a159-d291fd38cf7d. Source: http://collections.ala.org.au/public/show/dr340 (source published on 2015-01-07)
Australian Museum. Australian Museum provider for OZCAM. Record ID: 16ba09ef-69df-4e89-b013-2ff34953e778. Source: http://collections.ala.org.au/public/show/dr340 (source published on 2015-01-07)
Australian Museum. Australian Museum provider for OZCAM. Record ID: 07bbcba0-00b5-4eaf-83bf-0d685c4e94f0. Source: http://collections.ala.org.au/public/show/dr340 (source published on 2015-01-07)
Australian Museum. Australian Museum provider for OZCAM. Record ID: b218ab97-1c3a-4bd6-9861-0e5953b674b5. Source: http://collections.ala.org.au/public/show/dr340 (source published on 2015-01-07)
Australian Museum. Australian Museum provider for OZCAM. Record ID: a29241cd-55c5-461c-8d3a-403507757585. Source: http://collections.ala.org.au/public/show/dr340 (source published on 2015-01-07)
Australian Museum. Australian Museum provider for OZCAM. Record ID: 15b98ce9-3fb1-424a-91eb-839395198e89. Source: http://collections.ala.org.au/public/show/dr340 (source published on 2015-01-07)
Australian Museum. Australian Museum provider for OZCAM. Record ID: d65c0103-2a20-4f2e-9d72-78696d6dc772. Source: http://collections.ala.org.au/public/show/dr340 (source published on 2015-01-07)
Australian Museum. Australian Museum provider for OZCAM. Record ID: 44b74169-1674-4fed-b33b-e7cabc6a9184. Source: http://collections.ala.org.au/public/show/dr340 (source published on 2015-01-07)
Australian Museum. Australian Museum provider for OZCAM. Record ID: 4011c225-f3ce-496c-80b5-3bd4a27da41f. Source: http://collections.ala.org.au/public/show/dr340 (source published on 2015-01-07)
Australian Museum. Australian Museum provider for OZCAM. Record ID: 72a43781-7757-46bb-8172-0e59c61bd152. Source: http://collections.ala.org.au/public/show/dr340 (source published on 2015-01-07)
Australian Museum. Australian Museum provider for OZCAM. Record ID: 5ad0da3e-16c5-4f3a-a7c8-8ec79b680927. Source: http://collections.ala.org.au/public/show/dr340 (source published on 2015-01-07)
Australian Museum. Australian Museum provider for OZCAM. Record ID: 60bf4fce-79d1-4a0e-8784-9013cc38ce1f. Source: http://collections.ala.org.au/public/show/dr340 (source published on 2015-01-07)
Australian Museum. Australian Museum provider for OZCAM. Record ID: ed157388-ff15-494f-a463-27f3953dc8b7. Source: http://collections.ala.org.au/public/show/dr340 (source published on 2015-01-07)
Australian Museum. Australian Museum provider for OZCAM. Record ID: a742892b-7f2a-4ae8-9cfa-288d221934ea. Source: http://collections.ala.org.au/public/show/dr340 (source published on 2015-01-07)
Australian Museum. Australian Museum provider for OZCAM. Record ID: c6d8adeb-0e84-4dbe-a6db-5f3a7573e73d. Source: http://collections.ala.org.au/public/show/dr340 (source published on 2015-01-07)
Australian Museum. Australian Museum provider for OZCAM. Record ID: e8d404b7-443d-48ee-ad0a-9f9c9c8daf57. Source: http://collections.ala.org.au/public/show/dr340 (source published on 2015-01-07)
Australian Museum. Australian Museum provider for OZCAM. Record ID: 37ab4fe5-58cc-40c5-9782-b72e4d882667. Source: http://collections.ala.org.au/public/show/dr340 (source published on 2015-01-07)
Australian Museum. Australian Museum provider for OZCAM. Record ID: 9e3b1ea8-467b-46ba-a7ae-86c1f4ad69b8. Source: http://collections.ala.org.au/public/show/dr340 (source published on 2015-01-07)
Australian Museum. Australian Museum provider for OZCAM. Record ID: 9512be30-0f89-41e3-8edb-d2d8f943025c. Source: http://collections.ala.org.au/public/show/dr340 (source published on 2015-01-07)
Australian Museum. Australian Museum provider for OZCAM. Record ID: e86d502f-6fd4-469c-8146-2048deb5b3c9. Source: http://collections.ala.org.au/public/show/dr340 (source published on 2015-01-07)
Australian Museum. Australian Museum provider for OZCAM. Record ID: 33bcd5e8-4da4-4df8-a231-c616220d234a. Source: http://collections.ala.org.au/public/show/dr340 (source published on 2015-01-07)
Australian Museum. Australian Museum provider for OZCAM. Record ID: 8b1b60f8-4ed0-47ef-a06f-5a92bc79c55d. Source: http://collections.ala.org.au/public/show/dr340 (source published on 2015-01-07)
Australian Museum. Australian Museum provider for OZCAM. Record ID: 98b47c37-bc78-4c41-b48f-f62cfae49064. Source: http://collections.ala.org.au/public/show/dr340 (source published on 2015-01-07)
Australian Museum. Australian Museum provider for OZCAM. Record ID: 85d2f5f3-96ff-4ae1-9075-eef4179d7b56. Source: http://collections.ala.org.au/public/show/dr340 (source published on 2015-01-07)
Australian Museum. Australian Museum provider for OZCAM. Record ID: b484f59c-c740-40e1-b580-238219b19343. Source: http://collections.ala.org.au/public/show/dr340 (source published on 2015-01-07)
Australian Museum. Australian Museum provider for OZCAM. Record ID: 08d5a3df-6e85-420b-9c28-604ebbfb4164. Source: http://collections.ala.org.au/public/show/dr340 (source published on 2015-01-07)
Australian Museum. Australian Museum provider for OZCAM. Record ID: 0a02286e-e3f2-4596-a63f-5eb0e8ee0bdf. Source: http://collections.ala.org.au/public/show/dr340 (source published on 2015-01-07)
Australian Museum. Australian Museum provider for OZCAM. Record ID: 1421519a-5b53-48fa-8b26-1620c9c04a24. Source: http://collections.ala.org.au/public/show/dr340 (source published on 2015-01-07)
Australian Museum. Australian Museum provider for OZCAM. Record ID: 169e58e5-9b08-41a7-bad1-31042a448167. Source: http://collections.ala.org.au/public/show/dr340 (source published on 2015-01-07)
Australian Museum. Australian Museum provider for OZCAM. Record ID: 19ccc095-6db5-4698-a2a8-2b0075d2d5ec. Source: http://collections.ala.org.au/public/show/dr340 (source published on 2015-01-07)
Australian Museum. Australian Museum provider for OZCAM. Record ID: 295d0c26-15e9-4db5-afb0-7e6c970e259f. Source: http://collections.ala.org.au/public/show/dr340 (source published on 2015-01-07)
Australian Museum. Australian Museum provider for OZCAM. Record ID: 2bda0958-cd78-4280-b81d-a325ac0eb773. Source: http://collections.ala.org.au/public/show/dr340 (source published on 2015-01-07)
Australian Museum. Australian Museum provider for OZCAM. Record ID: 2d2704ab-df77-4dd4-992a-539664710ada. Source: http://collections.ala.org.au/public/show/dr340 (source published on 2015-01-07)
Australian Museum. Australian Museum provider for OZCAM. Record ID: 34e67f64-dc17-4c4b-9e36-2d23c98bce03. Source: http://collections.ala.org.au/public/show/dr340 (source published on 2015-01-07)
Australian Museum. Australian Museum provider for OZCAM. Record ID: 38bccddd-734d-4ac7-b8eb-87e0e6bc8771. Source: http://collections.ala.org.au/public/show/dr340 (source published on 2015-01-07)
Australian Museum. Australian Museum provider for OZCAM. Record ID: 48f519f4-a285-48d9-b920-1e4dc6d008fe. Source: http://collections.ala.org.au/public/show/dr340 (source published on 2015-01-07)
Australian Museum. Australian Museum provider for OZCAM. Record ID: 4bd43306-1260-4ebb-b92e-98da215f9dc8. Source: http://collections.ala.org.au/public/show/dr340 (source published on 2015-01-07)
Australian Museum. Australian Museum provider for OZCAM. Record ID: 4e32b316-6a87-4a6c-b7c5-9c7ca958439d. Source: http://collections.ala.org.au/public/show/dr340 (source published on 2015-01-07)
Australian Museum. Australian Museum provider for OZCAM. Record ID: 52802756-537f-44bf-980d-cff5dd7de2ed. Source: http://collections.ala.org.au/public/show/dr340 (source published on 2015-01-07)
Australian Museum. Australian Museum provider for OZCAM. Record ID: 62c929bb-cbae-469c-9d3c-d6dd6c95bbbc. Source: http://collections.ala.org.au/public/show/dr340 (source published on 2015-01-07)
Australian Museum. Australian Museum provider for OZCAM. Record ID: 6417c0c5-4bf1-4b10-8ad7-846135ba99e4. Source: http://collections.ala.org.au/public/show/dr340 (source published on 2015-01-07)
Australian Museum. Australian Museum provider for OZCAM. Record ID: 681f3ea6-403b-4255-a349-a14962ac9e75. Source: http://collections.ala.org.au/public/show/dr340 (source published on 2015-01-07)
Australian Museum. Australian Museum provider for OZCAM. Record ID: 7b7828a2-c448-45ee-b22e-730868c342c1. Source: http://collections.ala.org.au/public/show/dr340 (source published on 2015-01-07)
Australian Museum. Australian Museum provider for OZCAM. Record ID: 9264a03d-c1b4-46e3-ad6e-ac4dbad02a9b. Source: http://collections.ala.org.au/public/show/dr340 (source published on 2015-01-07)
Australian Museum. Australian Museum provider for OZCAM. Record ID: 95bedec2-1640-4a4a-bdc6-a1f4f356abb7. Source: http://collections.ala.org.au/public/show/dr340 (source published on 2015-01-07)
Australian Museum. Australian Museum provider for OZCAM. Record ID: a53969b0-7fb0-48e3-8bb9-9923e5cdfa73. Source: http://collections.ala.org.au/public/show/dr340 (source published on 2015-01-07)
Australian Museum. Australian Museum provider for OZCAM. Record ID: acfd298d-6d26-4399-8f84-97c38f95d959. Source: http://collections.ala.org.au/public/show/dr340 (source published on 2015-01-07)
Australian Museum. Australian Museum provider for OZCAM. Record ID: b6efe39f-d06f-4f7d-a80f-aa20cfa6db9a. Source: http://collections.ala.org.au/public/show/dr340 (source published on 2015-01-07)
Australian Museum. Australian Museum provider for OZCAM. Record ID: b852dbf0-c0b4-4082-869c-cefddab0fbeb. Source: http://collections.ala.org.au/public/show/dr340 (source published on 2015-01-07)
Australian Museum. Australian Museum provider for OZCAM. Record ID: bd1c25af-56ae-432c-bb08-d15eab06cad7. Source: http://collections.ala.org.au/public/show/dr340 (source published on 2015-01-07)
Australian Museum. Australian Museum provider for OZCAM. Record ID: bfa0b5bf-2963-4575-964a-6c1c6a379e50. Source: http://collections.ala.org.au/public/show/dr340 (source published on 2015-01-07)
Australian Museum. Australian Museum provider for OZCAM. Record ID: c0ab0961-6827-4f42-9039-ac13a88c639f. Source: http://collections.ala.org.au/public/show/dr340 (source published on 2015-01-07)
Australian Museum. Australian Museum provider for OZCAM. Record ID: c1642e65-f656-423b-ac85-2a4530d5ea0c. Source: http://collections.ala.org.au/public/show/dr340 (source published on 2015-01-07)
Australian Museum. Australian Museum provider for OZCAM. Record ID: c236b375-da86-480d-ac17-68e72220b805. Source: http://collections.ala.org.au/public/show/dr340 (source published on 2015-01-07)
Australian Museum. Australian Museum provider for OZCAM. Record ID: c2af3d17-5b1a-437c-a530-87b29d76000d. Source: http://collections.ala.org.au/public/show/dr340 (source published on 2015-01-07)
Australian Museum. Australian Museum provider for OZCAM. Record ID: c8817605-4972-4dd6-a17e-880cc1ae0cfa. Source: http://collections.ala.org.au/public/show/dr340 (source published on 2015-01-07)
Australian Museum. Australian Museum provider for OZCAM. Record ID: d6eb5b70-87c9-45e4-a4b3-930d835c5159. Source: http://collections.ala.org.au/public/show/dr340 (source published on 2015-01-07)
Australian Museum. Australian Museum provider for OZCAM. Record ID: d9712912-88a5-4749-b672-36071e3911ee. Source: http://collections.ala.org.au/public/show/dr340 (source published on 2015-01-07)
Australian Museum. Australian Museum provider for OZCAM. Record ID: e80660b3-30b4-485b-9cc2-3b2830aa0307. Source: http://collections.ala.org.au/public/show/dr340 (source published on 2015-01-07)
Australian Museum. Australian Museum provider for OZCAM. Record ID: ea64c504-f99b-4146-9570-0d3f2e1c0d65. Source: http://collections.ala.org.au/public/show/dr340 (source published on 2015-01-07)
Australian Museum. Australian Museum provider for OZCAM. Record ID: ef96d337-9aba-41dc-90f6-1aba06877545. Source: http://collections.ala.org.au/public/show/dr340 (source published on 2015-01-07)
Australian Museum. Australian Museum provider for OZCAM. Record ID: f8b21a13-fdf5-4879-a646-e3ed7a385979. Source: http://collections.ala.org.au/public/show/dr340 (source published on 2015-01-07)
Australian Museum. Australian Museum provider for OZCAM. Record ID: 07541200-7182-4eab-9d25-4e2e992562de. Source: http://collections.ala.org.au/public/show/dr340 (source published on 2015-01-07)
Australian Museum. Australian Museum provider for OZCAM. Record ID: 07a977db-54c2-4e2e-846a-9d37901ada3d. Source: http://collections.ala.org.au/public/show/dr340 (source published on 2015-01-07)
Australian Museum. Australian Museum provider for OZCAM. Record ID: 0e1aa620-5e3f-4dd2-b8f1-bd008e74419d. Source: http://collections.ala.org.au/public/show/dr340 (source published on 2015-01-07)
Australian Museum. Australian Museum provider for OZCAM. Record ID: 0fb5e85a-a2fd-439d-8914-9b7752f4ca3a. Source: http://collections.ala.org.au/public/show/dr340 (source published on 2015-01-07)
Australian Museum. Australian Museum provider for OZCAM. Record ID: 12bc1954-fd32-4d9b-aee2-802ca9d862bc. Source: http://collections.ala.org.au/public/show/dr340 (source published on 2015-01-07)
Australian Museum. Australian Museum provider for OZCAM. Record ID: 14908e6c-e01a-4c16-bd43-b069ce1771cd. Source: http://collections.ala.org.au/public/show/dr340 (source published on 2015-01-07)
Australian Museum. Australian Museum provider for OZCAM. Record ID: 20a5abfb-43b1-478b-b083-7a780be3e117. Source: http://collections.ala.org.au/public/show/dr340 (source published on 2015-01-07)
Australian Museum. Australian Museum provider for OZCAM. Record ID: 31a5d9dc-4f9e-4599-974d-34a6e4a620c1. Source: http://collections.ala.org.au/public/show/dr340 (source published on 2015-01-07)
Australian Museum. Australian Museum provider for OZCAM. Record ID: 3485d1fd-77f2-496b-a634-4f0f2ada5a12. Source: http://collections.ala.org.au/public/show/dr340 (source published on 2015-01-07)
Australian Museum. Australian Museum provider for OZCAM. Record ID: 3621fb0a-937b-4811-9bbf-a36abae911f3. Source: http://collections.ala.org.au/public/show/dr340 (source published on 2015-01-07)
Australian Museum. Australian Museum provider for OZCAM. Record ID: 36a7d717-fdd0-4b41-9512-1b4953e245dc. Source: http://collections.ala.org.au/public/show/dr340 (source published on 2015-01-07)
Australian Museum. Australian Museum provider for OZCAM. Record ID: 378b6237-a8e2-4291-a06d-e24c66e08cb3. Source: http://collections.ala.org.au/public/show/dr340 (source published on 2015-01-07)
Australian Museum. Australian Museum provider for OZCAM. Record ID: 3bcd67b0-14cf-40b5-b64f-991fc795a9c1. Source: http://collections.ala.org.au/public/show/dr340 (source published on 2015-01-07)
Australian Museum. Australian Museum provider for OZCAM. Record ID: 40f26471-8665-4875-b080-db85405f0923. Source: http://collections.ala.org.au/public/show/dr340 (source published on 2015-01-07)
Australian Museum. Australian Museum provider for OZCAM. Record ID: 43e970bf-34fd-4bcf-9ce0-fe2838c69dd8. Source: http://collections.ala.org.au/public/show/dr340 (source published on 2015-01-07)
Australian Museum. Australian Museum provider for OZCAM. Record ID: 4a692e90-3db1-49e2-b55b-fbad5d2aace4. Source: http://collections.ala.org.au/public/show/dr340 (source published on 2015-01-07)
Australian Museum. Australian Museum provider for OZCAM. Record ID: 4f12a4f4-e6cb-498f-9fb1-d32d3d48bb97. Source: http://collections.ala.org.au/public/show/dr340 (source published on 2015-01-07)
Australian Museum. Australian Museum provider for OZCAM. Record ID: 5a28a927-7afe-451f-a9a3-560a4f3ea775. Source: http://collections.ala.org.au/public/show/dr340 (source published on 2015-01-07)
Australian Museum. Australian Museum provider for OZCAM. Record ID: 5e05c3b4-1962-42cb-ba65-3b7df6d37f77. Source: http://collections.ala.org.au/public/show/dr340 (source published on 2015-01-07)
Australian Museum. Australian Museum provider for OZCAM. Record ID: 609311ff-85ae-49fb-aae2-d2866796406d. Source: http://collections.ala.org.au/public/show/dr340 (source published on 2015-01-07)
Australian Museum. Australian Museum provider for OZCAM. Record ID: 61b45408-5080-4635-9517-073c43ae19ef. Source: http://collections.ala.org.au/public/show/dr340 (source published on 2015-01-07)
Australian Museum. Australian Museum provider for OZCAM. Record ID: 649410cc-b96f-46fe-a405-7f2bd6bb9c72. Source: http://collections.ala.org.au/public/show/dr340 (source published on 2015-01-07)
Australian Museum. Australian Museum provider for OZCAM. Record ID: 6992687c-77a3-47c5-ad4c-ddf1774760dd. Source: http://collections.ala.org.au/public/show/dr340 (source published on 2015-01-07)
Australian Museum. Australian Museum provider for OZCAM. Record ID: 69ce726f-b62d-47fb-a794-726fa3a6521d. Source: http://collections.ala.org.au/public/show/dr340 (source published on 2015-01-07)
Australian Museum. Australian Museum provider for OZCAM. Record ID: 6d77bdc9-456b-4735-b78e-b2f77c748a1a. Source: http://collections.ala.org.au/public/show/dr340 (source published on 2015-01-07)
Australian Museum. Australian Museum provider for OZCAM. Record ID: 7977ac01-b03e-43e6-baa9-0d1c38181d9c. Source: http://collections.ala.org.au/public/show/dr340 (source published on 2015-01-07)
Australian Museum. Australian Museum provider for OZCAM. Record ID: 7b4841be-97d9-454d-a750-aeb45b9fae2c. Source: http://collections.ala.org.au/public/show/dr340 (source published on 2015-01-07)
Australian Museum. Australian Museum provider for OZCAM. Record ID: 7d12d377-7bf2-4bc2-b55b-0e4a9a437fec. Source: http://collections.ala.org.au/public/show/dr340 (source published on 2015-01-07)
Australian Museum. Australian Museum provider for OZCAM. Record ID: 87b87a7f-94ab-4ad2-aac7-dd05d17fab23. Source: http://collections.ala.org.au/public/show/dr340 (source published on 2015-01-07)
Australian Museum. Australian Museum provider for OZCAM. Record ID: 9040a03f-e122-4099-8811-8da5f3dbf9e9. Source: http://collections.ala.org.au/public/show/dr340 (source published on 2015-01-07)
Australian Museum. Australian Museum provider for OZCAM. Record ID: 91e3d6ff-d5ea-43b3-b180-78050e6f0837. Source: http://collections.ala.org.au/public/show/dr340 (source published on 2015-01-07)
Australian Museum. Australian Museum provider for OZCAM. Record ID: 9771eb32-4e27-40df-8a3d-6d315f111c30. Source: http://collections.ala.org.au/public/show/dr340 (source published on 2015-01-07)
Australian Museum. Australian Museum provider for OZCAM. Record ID: 988c37f3-6b18-4f71-9eb6-ce384c81e104. Source: http://collections.ala.org.au/public/show/dr340 (source published on 2015-01-07)
Australian Museum. Australian Museum provider for OZCAM. Record ID: 9aef0761-52ed-4996-a3da-d8641d990c93. Source: http://collections.ala.org.au/public/show/dr340 (source published on 2015-01-07)
Australian Museum. Australian Museum provider for OZCAM. Record ID: 9af75a51-74a5-45a0-a417-40556f8c2175. Source: http://collections.ala.org.au/public/show/dr340 (source published on 2015-01-07)
Australian Museum. Australian Museum provider for OZCAM. Record ID: 9c2601a1-9c2f-4d6f-9fdd-dac54c98ed64. Source: http://collections.ala.org.au/public/show/dr340 (source published on 2015-01-07)
Australian Museum. Australian Museum provider for OZCAM. Record ID: 9c9b7b71-c160-41cd-9704-49c5faadeb61. Source: http://collections.ala.org.au/public/show/dr340 (source published on 2015-01-07)
Australian Museum. Australian Museum provider for OZCAM. Record ID: a6d8bd09-486a-400b-8b4f-ea03d0540569. Source: http://collections.ala.org.au/public/show/dr340 (source published on 2015-01-07)
Australian Museum. Australian Museum provider for OZCAM. Record ID: ab503683-aff4-4147-ad22-fa256e4f2b45. Source: http://collections.ala.org.au/public/show/dr340 (source published on 2015-01-07)
Australian Museum. Australian Museum provider for OZCAM. Record ID: b47c6be8-bd6d-46a4-9232-dda726b7764d. Source: http://collections.ala.org.au/public/show/dr340 (source published on 2015-01-07)
Australian Museum. Australian Museum provider for OZCAM. Record ID: b56f1350-7f1c-4342-8f16-1fbd202bc977. Source: http://collections.ala.org.au/public/show/dr340 (source published on 2015-01-07)
Australian Museum. Australian Museum provider for OZCAM. Record ID: b8225ae0-901b-439b-a9a1-ff27d16fe128. Source: http://collections.ala.org.au/public/show/dr340 (source published on 2015-01-07)
Australian Museum. Australian Museum provider for OZCAM. Record ID: c870cfa5-e74a-4724-b6b9-b374080380f8. Source: http://collections.ala.org.au/public/show/dr340 (source published on 2015-01-07)
Australian Museum. Australian Museum provider for OZCAM. Record ID: d00073ea-6982-4781-8109-7880fbf0a33c. Source: http://collections.ala.org.au/public/show/dr340 (source published on 2015-01-07)
Australian Museum. Australian Museum provider for OZCAM. Record ID: d16ece08-abbb-40e3-b228-5867cb280cc5. Source: http://collections.ala.org.au/public/show/dr340 (source published on 2015-01-07)
Australian Museum. Australian Museum provider for OZCAM. Record ID: d2b0b78d-091d-4d26-aed2-42d5a2884226. Source: http://collections.ala.org.au/public/show/dr340 (source published on 2015-01-07)
Australian Museum. Australian Museum provider for OZCAM. Record ID: db52dd8c-9fdc-4c6d-abe0-a05adfceee80. Source: http://collections.ala.org.au/public/show/dr340 (source published on 2015-01-07)
Australian Museum. Australian Museum provider for OZCAM. Record ID: dbb384d5-ea65-4356-8439-7d463e0c0d9e. Source: http://collections.ala.org.au/public/show/dr340 (source published on 2015-01-07)
Australian Museum. Australian Museum provider for OZCAM. Record ID: e1a86900-823b-4f72-91e7-2c7e7484b78d. Source: http://collections.ala.org.au/public/show/dr340 (source published on 2015-01-07)
Australian Museum. Australian Museum provider for OZCAM. Record ID: f92f0fb3-f8de-4204-a84a-1bedadb9652d. Source: http://collections.ala.org.au/public/show/dr340 (source published on 2015-01-07)
Australian Museum. Australian Museum provider for OZCAM. Record ID: f9e9a706-ef68-4ee5-928e-d435c0d7d751. Source: http://collections.ala.org.au/public/show/dr340 (source published on 2015-01-07)
Australian Museum. Australian Museum provider for OZCAM. Record ID: acfb6143-f13f-4f9d-a98a-2a2e50d2f357. Source: http://collections.ala.org.au/public/show/dr340 (source published on 2015-01-07)
Australian Museum. Australian Museum provider for OZCAM. Record ID: 026d306a-22b0-4555-92e5-49da8267182a. Source: http://collections.ala.org.au/public/show/dr340 (source published on 2015-01-07)
Australian Museum. Australian Museum provider for OZCAM. Record ID: 39603ffb-e98c-435d-86e5-d5a8149c8e60. Source: http://collections.ala.org.au/public/show/dr340 (source published on 2015-01-07)
Australian Museum. Australian Museum provider for OZCAM. Record ID: 80ca80c9-b5aa-44f6-9ae4-ab0ff8154ebb. Source: http://collections.ala.org.au/public/show/dr340 (source published on 2015-01-07)
Australian Museum. Australian Museum provider for OZCAM. Record ID: 1e1c62ed-7f89-4da8-b25e-325fb1f6de13. Source: http://collections.ala.org.au/public/show/dr340 (source published on 2015-01-07)
Australian Museum. Australian Museum provider for OZCAM. Record ID: 4e893dad-ab62-436e-9bd9-b31486634841. Source: http://collections.ala.org.au/public/show/dr340 (source published on 2015-01-07)
Australian Museum. Australian Museum provider for OZCAM. Record ID: 702a1f4b-b76f-4f4a-8beb-5a9701dcffcb. Source: http://collections.ala.org.au/public/show/dr340 (source published on 2015-01-07)
Australian Museum. Australian Museum provider for OZCAM. Record ID: 0f62dc81-3efd-4112-a1bf-79c08f0262f6. Source: http://collections.ala.org.au/public/show/dr340 (source published on 2015-01-07)
Australian Museum. Australian Museum provider for OZCAM. Record ID: 11191d14-c5bb-4e76-9cd6-980a16d5812a. Source: http://collections.ala.org.au/public/show/dr340 (source published on 2015-01-07)
Australian Museum. Australian Museum provider for OZCAM. Record ID: 150e6a26-d1e5-4f68-a4c7-ebee4844d834. Source: http://collections.ala.org.au/public/show/dr340 (source published on 2015-01-07)
Australian Museum. Australian Museum provider for OZCAM. Record ID: 6119fba0-3c21-4ffa-abb6-fe41274d24ec. Source: http://collections.ala.org.au/public/show/dr340 (source published on 2015-01-07)
Australian Museum. Australian Museum provider for OZCAM. Record ID: 6761e6ea-b7d8-425f-816f-74fc502fbeb4. Source: http://collections.ala.org.au/public/show/dr340 (source published on 2015-01-07)
Australian Museum. Australian Museum provider for OZCAM. Record ID: 8e8d616c-d4ff-41b5-8909-428ca4eba039. Source: http://collections.ala.org.au/public/show/dr340 (source published on 2015-01-07)
Australian Museum. Australian Museum provider for OZCAM. Record ID: b8da4fd2-2c17-49ed-973e-f8b951476d48. Source: http://collections.ala.org.au/public/show/dr340 (source published on 2015-01-07)
Australian Museum. Australian Museum provider for OZCAM. Record ID: e01c44ab-37c8-4e1a-bafa-b984bb20a504. Source: http://collections.ala.org.au/public/show/dr340 (source published on 2015-01-07)
Australian Museum. Australian Museum provider for OZCAM. Record ID: e20eafd2-9025-4d72-a2c5-0d817fc807f8. Source: http://collections.ala.org.au/public/show/dr340 (source published on 2015-01-07)
Australian Museum. Australian Museum provider for OZCAM. Record ID: fe971d0c-c5f1-4c76-8dac-48e851227ca3. Source: http://collections.ala.org.au/public/show/dr340 (source published on 2015-01-07)
Australian Museum. Australian Museum provider for OZCAM. Record ID: 11198ee0-abd9-4837-bab0-6145adb09fe3. Source: http://collections.ala.org.au/public/show/dr340 (source published on 2015-01-07)
Australian Museum. Australian Museum provider for OZCAM. Record ID: 2289c8d3-b4af-4794-b1cb-a23a70397337. Source: http://collections.ala.org.au/public/show/dr340 (source published on 2015-01-07)
Australian Museum. Australian Museum provider for OZCAM. Record ID: 3821656a-76bd-403a-b3c1-fb3d9c81de99. Source: http://collections.ala.org.au/public/show/dr340 (source published on 2015-01-07)
Australian Museum. Australian Museum provider for OZCAM. Record ID: 8ac4eb26-ae09-4023-a92b-69fdfa76261d. Source: http://collections.ala.org.au/public/show/dr340 (source published on 2015-01-07)
Australian Museum. Australian Museum provider for OZCAM. Record ID: ac912f9c-baf0-4d78-9f04-ef51e2b4107f. Source: http://collections.ala.org.au/public/show/dr340 (source published on 2015-01-07)
Australian Museum. Australian Museum provider for OZCAM. Record ID: b9cc3152-4219-4bdf-b3cd-cfaeef1b631b. Source: http://collections.ala.org.au/public/show/dr340 (source published on 2015-01-07)
Australian Museum. Australian Museum provider for OZCAM. Record ID: baf61903-61bd-443b-a767-47fb683a8fed. Source: http://collections.ala.org.au/public/show/dr340 (source published on 2015-01-07)
Australian Museum. Australian Museum provider for OZCAM. Record ID: 05febc55-da55-4849-b96c-6f289471fdc2. Source: http://collections.ala.org.au/public/show/dr340 (source published on 2015-01-07)
Australian Museum. Australian Museum provider for OZCAM. Record ID: efd416a6-efe5-447d-94be-a6ba2e5d09e2. Source: http://collections.ala.org.au/public/show/dr340 (source published on 2015-01-07)
Australian Museum. Australian Museum provider for OZCAM. Record ID: eaeaac78-45db-4a5d-8b2b-c6a214075437. Source: http://collections.ala.org.au/public/show/dr340 (source published on 2015-01-07)
Australian Museum. Australian Museum provider for OZCAM. Record ID: 3bb717f9-b675-4566-af19-0fd6ee7b3f99. Source: http://collections.ala.org.au/public/show/dr340 (source published on 2015-01-07)
Australian Museum. Australian Museum provider for OZCAM. Record ID: 03142e9d-b60c-444e-95ae-b2aaf2e10579. Source: http://collections.ala.org.au/public/show/dr340 (source published on 2015-01-07)
Australian Museum. Australian Museum provider for OZCAM. Record ID: 06baa900-7063-43dc-80a6-3f497d347dbe. Source: http://collections.ala.org.au/public/show/dr340 (source published on 2015-01-07)
Australian Museum. Australian Museum provider for OZCAM. Record ID: 2315d99a-8510-4844-82ab-9c9a13999738. Source: http://collections.ala.org.au/public/show/dr340 (source published on 2015-01-07)
Australian Museum. Australian Museum provider for OZCAM. Record ID: 5e8f882c-d090-4d1d-b79c-762ca6612c9f. Source: http://collections.ala.org.au/public/show/dr340 (source published on 2015-01-07)
Australian Museum. Australian Museum provider for OZCAM. Record ID: 889fce0c-6303-43d3-9389-77ae77f6df06. Source: http://collections.ala.org.au/public/show/dr340 (source published on 2015-01-07)
Australian Museum. Australian Museum provider for OZCAM. Record ID: a6a2d339-4991-4b51-91f4-116100449d61. Source: http://collections.ala.org.au/public/show/dr340 (source published on 2015-01-07)
Australian Museum. Australian Museum provider for OZCAM. Record ID: c3ee222b-17f3-4cea-bfcf-25d0da73001a. Source: http://collections.ala.org.au/public/show/dr340 (source published on 2015-01-07)
Australian Museum. Australian Museum provider for OZCAM. Record ID: ecf2ce5b-d759-48b8-872b-87364dc45536. Source: http://collections.ala.org.au/public/show/dr340 (source published on 2015-01-07)
Australian Museum. Australian Museum provider for OZCAM. Record ID: 08cdba0c-1c9a-4d96-ba94-bfc0543096e0. Source: http://collections.ala.org.au/public/show/dr340 (source published on 2015-01-07)
Australian Museum. Australian Museum provider for OZCAM. Record ID: 39144e32-85c0-4e94-9b13-98fbe513aa7d. Source: http://collections.ala.org.au/public/show/dr340 (source published on 2015-01-07)
Australian Museum. Australian Museum provider for OZCAM. Record ID: 4417edb1-44d3-49a9-8a1f-9b66fee05655. Source: http://collections.ala.org.au/public/show/dr340 (source published on 2015-01-07)
Australian Museum. Australian Museum provider for OZCAM. Record ID: 6827491c-9300-486e-99c4-fce0f5b1a172. Source: http://collections.ala.org.au/public/show/dr340 (source published on 2015-01-07)
Australian Museum. Australian Museum provider for OZCAM. Record ID: 8255b6e0-1365-48bd-9d58-33b3c80e1ac6. Source: http://collections.ala.org.au/public/show/dr340 (source published on 2015-01-07)
Australian Museum. Australian Museum provider for OZCAM. Record ID: af94aa56-3bed-4317-861c-24c43e7305d3. Source: http://collections.ala.org.au/public/show/dr340 (source published on 2015-01-07)
Australian Museum. Australian Museum provider for OZCAM. Record ID: b19b61f4-43ac-4862-92b0-59afa0762041. Source: http://collections.ala.org.au/public/show/dr340 (source published on 2015-01-07)
Australian Museum. Australian Museum provider for OZCAM. Record ID: ba7ff1d3-a557-4663-88a7-b9cccb90ae73. Source: http://collections.ala.org.au/public/show/dr340 (source published on 2015-01-07)
Australian Museum. Australian Museum provider for OZCAM. Record ID: e7cdfba0-0de0-49f1-b734-1eb28fb50fec. Source: http://collections.ala.org.au/public/show/dr340 (source published on 2015-01-07)
Australian Museum. Australian Museum provider for OZCAM. Record ID: 11401b91-0a58-420e-8229-d40c73d25907. Source: http://collections.ala.org.au/public/show/dr340 (source published on 2015-01-07)
Australian Museum. Australian Museum provider for OZCAM. Record ID: a6e1ef62-ff13-4969-a47d-9b3b26e6cd94. Source: http://collections.ala.org.au/public/show/dr340 (source published on 2015-01-07)
Australian Museum. Australian Museum provider for OZCAM. Record ID: a7e85256-ab0a-4d13-83c0-38d6e09a45b7. Source: http://collections.ala.org.au/public/show/dr340 (source published on 2015-01-07)
Australian Museum. Australian Museum provider for OZCAM. Record ID: 4d56b893-6890-41b8-a5d8-37a5dc352ab2. Source: http://collections.ala.org.au/public/show/dr340 (source published on 2015-01-07)
Australian Museum. Australian Museum provider for OZCAM. Record ID: 714b9bf0-b939-4b83-8802-a74f5a0cd055. Source: http://collections.ala.org.au/public/show/dr340 (source published on 2015-01-07)
Australian Museum. Australian Museum provider for OZCAM. Record ID: 73dcb9f2-84e5-4761-883d-509c1741af39. Source: http://collections.ala.org.au/public/show/dr340 (source published on 2015-01-07)
Australian Museum. Australian Museum provider for OZCAM. Record ID: d0876257-1650-4fee-9515-b1e5c838a6a3. Source: http://collections.ala.org.au/public/show/dr340 (source published on 2015-01-07)
Australian Museum. Australian Museum provider for OZCAM. Record ID: a6e1ef62-ff13-4969-a47d-9b3b26e6cd94. Source: http://collections.ala.org.au/public/show/dr340 (source published on 2015-01-07)
Australian Museum. Australian Museum provider for OZCAM. Record ID: 04625d58-c288-4874-b3de-87d5d5c93166. Source: http://collections.ala.org.au/public/show/dr340 (source published on 2015-01-07)
Australian Museum. Australian Museum provider for OZCAM. Record ID: 06ba4911-0ee1-4535-9811-d22a8d862fd4. Source: http://collections.ala.org.au/public/show/dr340 (source published on 2015-01-07)
Australian Museum. Australian Museum provider for OZCAM. Record ID: 0faed59a-c09d-46d2-9ee1-a546a93891c2. Source: http://collections.ala.org.au/public/show/dr340 (source published on 2015-01-07)
Australian Museum. Australian Museum provider for OZCAM. Record ID: 0fdef858-034f-4061-804e-0b05a7c431be. Source: http://collections.ala.org.au/public/show/dr340 (source published on 2015-01-07)
Australian Museum. Australian Museum provider for OZCAM. Record ID: 1038921b-a65d-48cd-aba2-bb7ffe79122c. Source: http://collections.ala.org.au/public/show/dr340 (source published on 2015-01-07)
Australian Museum. Australian Museum provider for OZCAM. Record ID: 16792111-5685-4740-aae1-35ff84944f4a. Source: http://collections.ala.org.au/public/show/dr340 (source published on 2015-01-07)
Australian Museum. Australian Museum provider for OZCAM. Record ID: 16c3c743-98a4-460d-98da-f49cb10b19bc. Source: http://collections.ala.org.au/public/show/dr340 (source published on 2015-01-07)
Australian Museum. Australian Museum provider for OZCAM. Record ID: 18a16b96-a7fe-4931-8ea9-8dd7d84afa2e. Source: http://collections.ala.org.au/public/show/dr340 (source published on 2015-01-07)
Australian Museum. Australian Museum provider for OZCAM. Record ID: 2b73317c-fd0c-464d-83bd-7da8da110d51. Source: http://collections.ala.org.au/public/show/dr340 (source published on 2015-01-07)
Australian Museum. Australian Museum provider for OZCAM. Record ID: 2ba8d89a-1eba-4dd4-a1ef-89d5801a22e4. Source: http://collections.ala.org.au/public/show/dr340 (source published on 2015-01-07)
Australian Museum. Australian Museum provider for OZCAM. Record ID: 2f948124-e7ff-4150-b491-6c20657ecafc. Source: http://collections.ala.org.au/public/show/dr340 (source published on 2015-01-07)
Australian Museum. Australian Museum provider for OZCAM. Record ID: 3e078f79-e21e-4fb6-a697-0c381648ccc0. Source: http://collections.ala.org.au/public/show/dr340 (source published on 2015-01-07)
Australian Museum. Australian Museum provider for OZCAM. Record ID: 420fcba1-7e6d-4aae-bd75-cdab391e11fa. Source: http://collections.ala.org.au/public/show/dr340 (source published on 2015-01-07)
Australian Museum. Australian Museum provider for OZCAM. Record ID: 521df734-c844-4479-94f5-7d612d990239. Source: http://collections.ala.org.au/public/show/dr340 (source published on 2015-01-07)
Australian Museum. Australian Museum provider for OZCAM. Record ID: 52f1b0f7-463a-4a33-ac67-c7c6d98e89e9. Source: http://collections.ala.org.au/public/show/dr340 (source published on 2015-01-07)
Australian Museum. Australian Museum provider for OZCAM. Record ID: 5b38d478-2818-4f6c-8dcb-c2c95ecc6222. Source: http://collections.ala.org.au/public/show/dr340 (source published on 2015-01-07)
Australian Museum. Australian Museum provider for OZCAM. Record ID: 5d0d181e-8353-410f-a276-81dd4fd06120. Source: http://collections.ala.org.au/public/show/dr340 (source published on 2015-01-07)
Australian Museum. Australian Museum provider for OZCAM. Record ID: 5dd8fd64-f3b2-4b58-b600-4c1fa714253d. Source: http://collections.ala.org.au/public/show/dr340 (source published on 2015-01-07)
Australian Museum. Australian Museum provider for OZCAM. Record ID: 5fada309-1ba0-4c33-b473-207e679c6af7. Source: http://collections.ala.org.au/public/show/dr340 (source published on 2015-01-07)
Australian Museum. Australian Museum provider for OZCAM. Record ID: 645fdb28-e1fa-4089-b361-c5ce19f8152a. Source: http://collections.ala.org.au/public/show/dr340 (source published on 2015-01-07)
Australian Museum. Australian Museum provider for OZCAM. Record ID: 651fbe79-8aeb-454d-a032-200e04e911aa. Source: http://collections.ala.org.au/public/show/dr340 (source published on 2015-01-07)
Australian Museum. Australian Museum provider for OZCAM. Record ID: 661a3c31-4be5-4480-9e73-aef1e0beb28c. Source: http://collections.ala.org.au/public/show/dr340 (source published on 2015-01-07)
Australian Museum. Australian Museum provider for OZCAM. Record ID: 730791db-08aa-4ca1-b899-234b48dc522c. Source: http://collections.ala.org.au/public/show/dr340 (source published on 2015-01-07)
Australian Museum. Australian Museum provider for OZCAM. Record ID: 749c46a6-a4bd-41ac-9d18-325f1073a2d6. Source: http://collections.ala.org.au/public/show/dr340 (source published on 2015-01-07)
Australian Museum. Australian Museum provider for OZCAM. Record ID: 76e8d907-f423-445d-911c-e80445eb005b. Source: http://collections.ala.org.au/public/show/dr340 (source published on 2015-01-07)
Australian Museum. Australian Museum provider for OZCAM. Record ID: 76f7f31c-c73e-4874-a127-415331a171a6. Source: http://collections.ala.org.au/public/show/dr340 (source published on 2015-01-07)
Australian Museum. Australian Museum provider for OZCAM. Record ID: 7ef02370-0df5-4b36-9295-75aa70748c11. Source: http://collections.ala.org.au/public/show/dr340 (source published on 2015-01-07)
Australian Museum. Australian Museum provider for OZCAM. Record ID: 7f7790ad-d727-418e-85a4-8fe43480e9d6. Source: http://collections.ala.org.au/public/show/dr340 (source published on 2015-01-07)
Australian Museum. Australian Museum provider for OZCAM. Record ID: 816a9dee-de63-4997-8e20-8be4a180fa87. Source: http://collections.ala.org.au/public/show/dr340 (source published on 2015-01-07)
Australian Museum. Australian Museum provider for OZCAM. Record ID: 82851cd4-797a-4a2d-a14c-d44be5ad2e86. Source: http://collections.ala.org.au/public/show/dr340 (source published on 2015-01-07)
Australian Museum. Australian Museum provider for OZCAM. Record ID: 834fa50a-27b8-4e7f-b293-86920cef4be3. Source: http://collections.ala.org.au/public/show/dr340 (source published on 2015-01-07)
Australian Museum. Australian Museum provider for OZCAM. Record ID: 8371e964-b660-4e36-95d2-16428ceb3cde. Source: http://collections.ala.org.au/public/show/dr340 (source published on 2015-01-07)
Australian Museum. Australian Museum provider for OZCAM. Record ID: 83857310-2023-4caa-94d0-42686597da32. Source: http://collections.ala.org.au/public/show/dr340 (source published on 2015-01-07)
Australian Museum. Australian Museum provider for OZCAM. Record ID: 89038867-f760-4f2e-91a5-b286ab641994. Source: http://collections.ala.org.au/public/show/dr340 (source published on 2015-01-07)
Australian Museum. Australian Museum provider for OZCAM. Record ID: 8e883861-cbe6-463e-bbb2-77c7216cb073. Source: http://collections.ala.org.au/public/show/dr340 (source published on 2015-01-07)
Australian Museum. Australian Museum provider for OZCAM. Record ID: 90dfe2cb-f28a-41c9-b794-ef82a510fea9. Source: http://collections.ala.org.au/public/show/dr340 (source published on 2015-01-07)
Australian Museum. Australian Museum provider for OZCAM. Record ID: 92505b26-1a8e-4316-8ba9-3a493ffd0da3. Source: http://collections.ala.org.au/public/show/dr340 (source published on 2015-01-07)
Australian Museum. Australian Museum provider for OZCAM. Record ID: 93e744ae-7cf6-4bc2-87db-7df98353beaf. Source: http://collections.ala.org.au/public/show/dr340 (source published on 2015-01-07)
Australian Museum. Australian Museum provider for OZCAM. Record ID: 95690e69-dbd7-45f9-b89f-f1828ae55aad. Source: http://collections.ala.org.au/public/show/dr340 (source published on 2015-01-07)
Australian Museum. Australian Museum provider for OZCAM. Record ID: 95c4e677-ff72-45c6-965f-dfd0f9807634. Source: http://collections.ala.org.au/public/show/dr340 (source published on 2015-01-07)
Australian Museum. Australian Museum provider for OZCAM. Record ID: 98ea9ed0-1dc2-4aaa-a9b9-5278c62d90a2. Source: http://collections.ala.org.au/public/show/dr340 (source published on 2015-01-07)
Australian Museum. Australian Museum provider for OZCAM. Record ID: 9bea5588-3c89-466e-8fd7-acfdb16e291b. Source: http://collections.ala.org.au/public/show/dr340 (source published on 2015-01-07)
Australian Museum. Australian Museum provider for OZCAM. Record ID: a0bfa159-65aa-4c34-8af9-dbc8c237d961. Source: http://collections.ala.org.au/public/show/dr340 (source published on 2015-01-07)
Australian Museum. Australian Museum provider for OZCAM. Record ID: b371ca37-4a14-46c4-8ba2-49c02bc25ae3. Source: http://collections.ala.org.au/public/show/dr340 (source published on 2015-01-07)
Australian Museum. Australian Museum provider for OZCAM. Record ID: b5416ead-8bce-48ec-b590-22e8de924430. Source: http://collections.ala.org.au/public/show/dr340 (source published on 2015-01-07)
Australian Museum. Australian Museum provider for OZCAM. Record ID: b945e045-06d9-459d-ad5b-bd7237c21ca7. Source: http://collections.ala.org.au/public/show/dr340 (source published on 2015-01-07)
Australian Museum. Australian Museum provider for OZCAM. Record ID: be0bb92c-2337-49f6-b5a3-28f28a16bbe5. Source: http://collections.ala.org.au/public/show/dr340 (source published on 2015-01-07)
Australian Museum. Australian Museum provider for OZCAM. Record ID: bf094a3a-b4b3-4099-b36e-d1a844dd442e. Source: http://collections.ala.org.au/public/show/dr340 (source published on 2015-01-07)
Australian Museum. Australian Museum provider for OZCAM. Record ID: c7780089-3f36-4d68-b3dd-26b8834dd255. Source: http://collections.ala.org.au/public/show/dr340 (source published on 2015-01-07)
Australian Museum. Australian Museum provider for OZCAM. Record ID: c80a52f9-826b-4401-9ff9-49efde027efe. Source: http://collections.ala.org.au/public/show/dr340 (source published on 2015-01-07)
Australian Museum. Australian Museum provider for OZCAM. Record ID: c81bcf25-366e-4f86-b07c-212ffd4cb28a. Source: http://collections.ala.org.au/public/show/dr340 (source published on 2015-01-07)
Australian Museum. Australian Museum provider for OZCAM. Record ID: c87e1ab5-a418-4381-8ac5-12ce5efcbaaf. Source: http://collections.ala.org.au/public/show/dr340 (source published on 2015-01-07)
Australian Museum. Australian Museum provider for OZCAM. Record ID: cba5ce50-b70a-4297-9571-03a997d4e54b. Source: http://collections.ala.org.au/public/show/dr340 (source published on 2015-01-07)
Australian Museum. Australian Museum provider for OZCAM. Record ID: d310a0c6-ca20-4db0-9909-eb59ef98d0ee. Source: http://collections.ala.org.au/public/show/dr340 (source published on 2015-01-07)
Australian Museum. Australian Museum provider for OZCAM. Record ID: d6775048-391e-4d6f-ac59-8c44b22a5e18. Source: http://collections.ala.org.au/public/show/dr340 (source published on 2015-01-07)
Australian Museum. Australian Museum provider for OZCAM. Record ID: d74583cb-598a-435b-a525-11f3dbbb5355. Source: http://collections.ala.org.au/public/show/dr340 (source published on 2015-01-07)
Australian Museum. Australian Museum provider for OZCAM. Record ID: d848904e-ece1-4981-9545-5b0a3c811f01. Source: http://collections.ala.org.au/public/show/dr340 (source published on 2015-01-07)
Australian Museum. Australian Museum provider for OZCAM. Record ID: e127ea89-6fe5-4754-9399-30249c395a79. Source: http://collections.ala.org.au/public/show/dr340 (source published on 2015-01-07)
Australian Museum. Australian Museum provider for OZCAM. Record ID: e516d3b8-580d-4a3f-8414-00d58ede3075. Source: http://collections.ala.org.au/public/show/dr340 (source published on 2015-01-07)
Australian Museum. Australian Museum provider for OZCAM. Record ID: e8360822-8b51-4690-9b8b-a4607b00e8b6. Source: http://collections.ala.org.au/public/show/dr340 (source published on 2015-01-07)
Australian Museum. Australian Museum provider for OZCAM. Record ID: eb797038-a0ba-4ac9-87ff-d78a84c68484. Source: http://collections.ala.org.au/public/show/dr340 (source published on 2015-01-07)
Australian Museum. Australian Museum provider for OZCAM. Record ID: fcbddc89-40b1-416b-88eb-dfc23d4ee774. Source: http://collections.ala.org.au/public/show/dr340 (source published on 2015-01-07)
Australian Museum. Australian Museum provider for OZCAM. Record ID: 00ff4600-2949-4cf2-b6c8-1f70c2bb482d. Source: http://collections.ala.org.au/public/show/dr340 (source published on 2015-01-07)
Australian Museum. Australian Museum provider for OZCAM. Record ID: 043edd2e-cbb2-4815-a279-15708b710735. Source: http://collections.ala.org.au/public/show/dr340 (source published on 2015-01-07)
Australian Museum. Australian Museum provider for OZCAM. Record ID: 081b7240-7345-4f0b-ae61-b13edb79599b. Source: http://collections.ala.org.au/public/show/dr340 (source published on 2015-01-07)
Australian Museum. Australian Museum provider for OZCAM. Record ID: 0aaa89f2-b7a4-4375-b5e4-7396a23da049. Source: http://collections.ala.org.au/public/show/dr340 (source published on 2015-01-07)
Australian Museum. Australian Museum provider for OZCAM. Record ID: 0dc1fb08-00b8-4147-9fcd-2eb1832a2cdd. Source: http://collections.ala.org.au/public/show/dr340 (source published on 2015-01-07)
Australian Museum. Australian Museum provider for OZCAM. Record ID: 0ea7fd1d-c44c-4494-97e3-7d547a0084a5. Source: http://collections.ala.org.au/public/show/dr340 (source published on 2015-01-07)
Australian Museum. Australian Museum provider for OZCAM. Record ID: 160596ac-d4de-4e7d-b5c1-1c574fda9ac4. Source: http://collections.ala.org.au/public/show/dr340 (source published on 2015-01-07)
Australian Museum. Australian Museum provider for OZCAM. Record ID: 1b070699-5779-4842-9b73-aff4addc01f5. Source: http://collections.ala.org.au/public/show/dr340 (source published on 2015-01-07)
Australian Museum. Australian Museum provider for OZCAM. Record ID: 1bf44f94-0eae-42dd-9c43-3021f9630ad9. Source: http://collections.ala.org.au/public/show/dr340 (source published on 2015-01-07)
Australian Museum. Australian Museum provider for OZCAM. Record ID: 20708246-6bcd-4311-9b0d-eaf46a2ac8ba. Source: http://collections.ala.org.au/public/show/dr340 (source published on 2015-01-07)
Australian Museum. Australian Museum provider for OZCAM. Record ID: 20c2f5e8-6c61-43b4-b793-6b4c3cfce3c8. Source: http://collections.ala.org.au/public/show/dr340 (source published on 2015-01-07)
Australian Museum. Australian Museum provider for OZCAM. Record ID: 2253d5d4-819a-44d1-81d8-139965a4f317. Source: http://collections.ala.org.au/public/show/dr340 (source published on 2015-01-07)
Australian Museum. Australian Museum provider for OZCAM. Record ID: 23210e91-77da-448a-a6ef-c866eb13053e. Source: http://collections.ala.org.au/public/show/dr340 (source published on 2015-01-07)
Australian Museum. Australian Museum provider for OZCAM. Record ID: 235162a5-6290-4b25-809c-6c9bb99fcb9e. Source: http://collections.ala.org.au/public/show/dr340 (source published on 2015-01-07)
Australian Museum. Australian Museum provider for OZCAM. Record ID: 2d364fd2-07ce-4a18-b443-4177adcaba36. Source: http://collections.ala.org.au/public/show/dr340 (source published on 2015-01-07)
Australian Museum. Australian Museum provider for OZCAM. Record ID: 32723a22-46be-49d9-b061-466f651d7e4a. Source: http://collections.ala.org.au/public/show/dr340 (source published on 2015-01-07)
Australian Museum. Australian Museum provider for OZCAM. Record ID: 3adf21e4-d07d-4413-af42-5ec78c246e07. Source: http://collections.ala.org.au/public/show/dr340 (source published on 2015-01-07)
Australian Museum. Australian Museum provider for OZCAM. Record ID: 3b9a1547-e369-4f82-adfa-9c91e3d994e4. Source: http://collections.ala.org.au/public/show/dr340 (source published on 2015-01-07)
Australian Museum. Australian Museum provider for OZCAM. Record ID: 3d76f5bf-a864-4fdc-9b71-c17297fecccc. Source: http://collections.ala.org.au/public/show/dr340 (source published on 2015-01-07)
Australian Museum. Australian Museum provider for OZCAM. Record ID: 42483932-bd06-46fd-978a-dba4e924f443. Source: http://collections.ala.org.au/public/show/dr340 (source published on 2015-01-07)
Australian Museum. Australian Museum provider for OZCAM. Record ID: 488c2508-1b8e-4d02-95a4-150233012450. Source: http://collections.ala.org.au/public/show/dr340 (source published on 2015-01-07)
Australian Museum. Australian Museum provider for OZCAM. Record ID: 4964f92f-ca39-43e6-936e-d6140a1d4518. Source: http://collections.ala.org.au/public/show/dr340 (source published on 2015-01-07)
Australian Museum. Australian Museum provider for OZCAM. Record ID: 499d16cc-0dfb-472c-a7d0-9b8ac2682f98. Source: http://collections.ala.org.au/public/show/dr340 (source published on 2015-01-07)
Australian Museum. Australian Museum provider for OZCAM. Record ID: 4a3b3a16-e7df-452a-a740-38373cc5d5bb. Source: http://collections.ala.org.au/public/show/dr340 (source published on 2015-01-07)
Australian Museum. Australian Museum provider for OZCAM. Record ID: 4b4ea828-134e-4981-a185-7fb9a869b75e. Source: http://collections.ala.org.au/public/show/dr340 (source published on 2015-01-07)
Australian Museum. Australian Museum provider for OZCAM. Record ID: 4b5d5bed-6410-4fb8-b04a-be2b847cc6ca. Source: http://collections.ala.org.au/public/show/dr340 (source published on 2015-01-07)
Australian Museum. Australian Museum provider for OZCAM. Record ID: 4c7c097b-5dde-48b2-9ac1-a449f7b20265. Source: http://collections.ala.org.au/public/show/dr340 (source published on 2015-01-07)
Australian Museum. Australian Museum provider for OZCAM. Record ID: 51195b7d-d94a-4782-9538-cf96d54435d5. Source: http://collections.ala.org.au/public/show/dr340 (source published on 2015-01-07)
Australian Museum. Australian Museum provider for OZCAM. Record ID: 59d94635-73d0-4e1f-a534-f0ad76fe0f6f. Source: http://collections.ala.org.au/public/show/dr340 (source published on 2015-01-07)
Australian Museum. Australian Museum provider for OZCAM. Record ID: 5cf53237-96fb-4357-a809-d31f592a2da4. Source: http://collections.ala.org.au/public/show/dr340 (source published on 2015-01-07)
Australian Museum. Australian Museum provider for OZCAM. Record ID: 629c5ebc-3299-4cca-8b06-afce5664f55d. Source: http://collections.ala.org.au/public/show/dr340 (source published on 2015-01-07)
Australian Museum. Australian Museum provider for OZCAM. Record ID: 64807ac0-e605-43cb-9071-c1ec9878ff84. Source: http://collections.ala.org.au/public/show/dr340 (source published on 2015-01-07)
Australian Museum. Australian Museum provider for OZCAM. Record ID: 652cd251-c77f-47f8-9cfd-b559460acccb. Source: http://collections.ala.org.au/public/show/dr340 (source published on 2015-01-07)
Australian Museum. Australian Museum provider for OZCAM. Record ID: 653bc8b6-5f99-49f1-a2ef-75edaf4e6492. Source: http://collections.ala.org.au/public/show/dr340 (source published on 2015-01-07)
Australian Museum. Australian Museum provider for OZCAM. Record ID: 66286db3-7a5d-4ea7-9748-f59b209b7885. Source: http://collections.ala.org.au/public/show/dr340 (source published on 2015-01-07)
Australian Museum. Australian Museum provider for OZCAM. Record ID: 69b20890-b9d9-42b4-8e3d-0151f6ca5940. Source: http://collections.ala.org.au/public/show/dr340 (source published on 2015-01-07)
Australian Museum. Australian Museum provider for OZCAM. Record ID: 6a16cbfd-3729-4ebc-8aa9-9e0ad1fa3081. Source: http://collections.ala.org.au/public/show/dr340 (source published on 2015-01-07)
Australian Museum. Australian Museum provider for OZCAM. Record ID: 72e30926-7db8-4ae8-b52a-25e700ce3a64. Source: http://collections.ala.org.au/public/show/dr340 (source published on 2015-01-07)
Australian Museum. Australian Museum provider for OZCAM. Record ID: 7726057f-cab1-406f-bf60-54867abdcc17. Source: http://collections.ala.org.au/public/show/dr340 (source published on 2015-01-07)
Australian Museum. Australian Museum provider for OZCAM. Record ID: 78a01264-f643-4be0-a7e2-d64d241b538c. Source: http://collections.ala.org.au/public/show/dr340 (source published on 2015-01-07)
Australian Museum. Australian Museum provider for OZCAM. Record ID: 7abfccc9-1925-48d3-8e80-1496820b41ab. Source: http://collections.ala.org.au/public/show/dr340 (source published on 2015-01-07)
Australian Museum. Australian Museum provider for OZCAM. Record ID: 7c300d75-2981-44b8-a365-9d14e10ffaf4. Source: http://collections.ala.org.au/public/show/dr340 (source published on 2015-01-07)
Australian Museum. Australian Museum provider for OZCAM. Record ID: 7c3ef953-5d57-4689-8de1-9aadeff5e864. Source: http://collections.ala.org.au/public/show/dr340 (source published on 2015-01-07)
Australian Museum. Australian Museum provider for OZCAM. Record ID: 8060fff5-6535-41d8-859a-26b0e0d79240. Source: http://collections.ala.org.au/public/show/dr340 (source published on 2015-01-07)
Australian Museum. Australian Museum provider for OZCAM. Record ID: 85d323ac-0f8e-4875-a2ae-163c1ff18d0e. Source: http://collections.ala.org.au/public/show/dr340 (source published on 2015-01-07)
Australian Museum. Australian Museum provider for OZCAM. Record ID: 8eeebd30-bb6b-4dc8-9853-715c07a2f957. Source: http://collections.ala.org.au/public/show/dr340 (source published on 2015-01-07)
Australian Museum. Australian Museum provider for OZCAM. Record ID: 90c671b9-a0ae-4d86-a3c4-9f1c0f1aff01. Source: http://collections.ala.org.au/public/show/dr340 (source published on 2015-01-07)
Australian Museum. Australian Museum provider for OZCAM. Record ID: 90c76baa-9610-4944-b1b2-600cab88d1e0. Source: http://collections.ala.org.au/public/show/dr340 (source published on 2015-01-07)
Australian Museum. Australian Museum provider for OZCAM. Record ID: 91ffaa9c-1f98-48be-bcf5-ca7e222da149. Source: http://collections.ala.org.au/public/show/dr340 (source published on 2015-01-07)
Australian Museum. Australian Museum provider for OZCAM. Record ID: 954c0490-20b9-4a72-933e-014879146176. Source: http://collections.ala.org.au/public/show/dr340 (source published on 2015-01-07)
Australian Museum. Australian Museum provider for OZCAM. Record ID: 99ff821a-d1ed-470b-ab1f-f5d03f41ab7e. Source: http://collections.ala.org.au/public/show/dr340 (source published on 2015-01-07)
Australian Museum. Australian Museum provider for OZCAM. Record ID: 9f643c62-60c5-4ac3-9860-a5616513b61a. Source: http://collections.ala.org.au/public/show/dr340 (source published on 2015-01-07)
Australian Museum. Australian Museum provider for OZCAM. Record ID: a2e98af8-f49e-49a7-b56b-35f5d504aed7. Source: http://collections.ala.org.au/public/show/dr340 (source published on 2015-01-07)
Australian Museum. Australian Museum provider for OZCAM. Record ID: a5071f1d-5001-4031-bdae-3ddbad798924. Source: http://collections.ala.org.au/public/show/dr340 (source published on 2015-01-07)
Australian Museum. Australian Museum provider for OZCAM. Record ID: a747934f-b943-499e-9c27-75c623fff04e. Source: http://collections.ala.org.au/public/show/dr340 (source published on 2015-01-07)
Australian Museum. Australian Museum provider for OZCAM. Record ID: af47ea64-bea7-4a62-b564-5a08a99301c6. Source: http://collections.ala.org.au/public/show/dr340 (source published on 2015-01-07)
Australian Museum. Australian Museum provider for OZCAM. Record ID: b036f8e2-0833-4569-9e3b-4acf01e010c8. Source: http://collections.ala.org.au/public/show/dr340 (source published on 2015-01-07)
Australian Museum. Australian Museum provider for OZCAM. Record ID: b04975f9-eb69-459b-9ade-a9ea1d6deb4c. Source: http://collections.ala.org.au/public/show/dr340 (source published on 2015-01-07)
Australian Museum. Australian Museum provider for OZCAM. Record ID: b0ac3bc6-33b6-4d32-8a36-7ba2da013fbc. Source: http://collections.ala.org.au/public/show/dr340 (source published on 2015-01-07)
Australian Museum. Australian Museum provider for OZCAM. Record ID: b10830ac-8ce1-42a1-a514-0b1f28c100a9. Source: http://collections.ala.org.au/public/show/dr340 (source published on 2015-01-07)
Australian Museum. Australian Museum provider for OZCAM. Record ID: b29002ed-4123-4023-918f-9be17050c86d. Source: http://collections.ala.org.au/public/show/dr340 (source published on 2015-01-07)
Australian Museum. Australian Museum provider for OZCAM. Record ID: b418a35f-3753-46c8-9ae1-f27c0bfa8d5c. Source: http://collections.ala.org.au/public/show/dr340 (source published on 2015-01-07)
Australian Museum. Australian Museum provider for OZCAM. Record ID: bb5b5de5-0fc7-4fc1-9689-d20457119942. Source: http://collections.ala.org.au/public/show/dr340 (source published on 2015-01-07)
Australian Museum. Australian Museum provider for OZCAM. Record ID: bbf44a91-342b-41d4-a690-b8a15706d326. Source: http://collections.ala.org.au/public/show/dr340 (source published on 2015-01-07)
Australian Museum. Australian Museum provider for OZCAM. Record ID: bdf16d51-3818-4f87-aab8-e05fba1abbc1. Source: http://collections.ala.org.au/public/show/dr340 (source published on 2015-01-07)
Australian Museum. Australian Museum provider for OZCAM. Record ID: bfd9b96f-61e1-4691-a1ed-adab3362346e. Source: http://collections.ala.org.au/public/show/dr340 (source published on 2015-01-07)
Australian Museum. Australian Museum provider for OZCAM. Record ID: c2a29edb-6173-41e1-bda7-5c12c07e5e00. Source: http://collections.ala.org.au/public/show/dr340 (source published on 2015-01-07)
Australian Museum. Australian Museum provider for OZCAM. Record ID: c37d2fde-e22f-44fb-a373-095ace7cbe56. Source: http://collections.ala.org.au/public/show/dr340 (source published on 2015-01-07)
Australian Museum. Australian Museum provider for OZCAM. Record ID: d1b2db4c-523a-479d-8efb-ba44ae1d7f4c. Source: http://collections.ala.org.au/public/show/dr340 (source published on 2015-01-07)
Australian Museum. Australian Museum provider for OZCAM. Record ID: d4025cd0-9875-4aff-9977-b96d922ec781. Source: http://collections.ala.org.au/public/show/dr340 (source published on 2015-01-07)
Australian Museum. Australian Museum provider for OZCAM. Record ID: d926ac8e-0306-42a9-ae8b-490b010cef5a. Source: http://collections.ala.org.au/public/show/dr340 (source published on 2015-01-07)
Australian Museum. Australian Museum provider for OZCAM. Record ID: da047969-c40a-431e-acf5-28c660e2113b. Source: http://collections.ala.org.au/public/show/dr340 (source published on 2015-01-07)
Australian Museum. Australian Museum provider for OZCAM. Record ID: dd240cc3-e50a-4dfe-81d4-cf5ee0c775ba. Source: http://collections.ala.org.au/public/show/dr340 (source published on 2015-01-07)
Australian Museum. Australian Museum provider for OZCAM. Record ID: dd8a5f1c-ec71-4003-9c3d-fac64a0764ba. Source: http://collections.ala.org.au/public/show/dr340 (source published on 2015-01-07)
Australian Museum. Australian Museum provider for OZCAM. Record ID: e074da8e-3360-4ef1-b9a7-fac7d6fc8502. Source: http://collections.ala.org.au/public/show/dr340 (source published on 2015-01-07)
Australian Museum. Australian Museum provider for OZCAM. Record ID: e33aeb4f-cb51-421a-bed1-34ca27ebcffb. Source: http://collections.ala.org.au/public/show/dr340 (source published on 2015-01-07)
Australian Museum. Australian Museum provider for OZCAM. Record ID: ee368fd6-3958-4e1b-adc6-93c4d45905ed. Source: http://collections.ala.org.au/public/show/dr340 (source published on 2015-01-07)
Australian Museum. Australian Museum provider for OZCAM. Record ID: efefa77f-bd6b-4081-8e11-327766daab4d. Source: http://collections.ala.org.au/public/show/dr340 (source published on 2015-01-07)
Australian Museum. Australian Museum provider for OZCAM. Record ID: f5362a07-6140-4657-aa5f-1d17e2e9c255. Source: http://collections.ala.org.au/public/show/dr340 (source published on 2015-01-07)
Australian Museum. Australian Museum provider for OZCAM. Record ID: f53f8588-4cf7-40cf-b854-5cea852b2df6. Source: http://collections.ala.org.au/public/show/dr340 (source published on 2015-01-07)
Australian Museum. Australian Museum provider for OZCAM. Record ID: 63251609-0dec-4a5b-a377-3deb12144272. Source: http://collections.ala.org.au/public/show/dr340 (source published on 2015-01-07)
Australian Museum. Australian Museum provider for OZCAM. Record ID: 050d0b07-9849-4755-9a5a-e0807e98877c. Source: http://collections.ala.org.au/public/show/dr340 (source published on 2015-01-07)
Australian Museum. Australian Museum provider for OZCAM. Record ID: 23cd6317-c411-4092-a8be-b663610e4dce. Source: http://collections.ala.org.au/public/show/dr340 (source published on 2015-01-07)
Australian Museum. Australian Museum provider for OZCAM. Record ID: 2577f8b2-0702-4b80-b62b-86fe4103322b. Source: http://collections.ala.org.au/public/show/dr340 (source published on 2015-01-07)
Australian Museum. Australian Museum provider for OZCAM. Record ID: 3e247368-5ff9-49db-a969-b1eb8948c629. Source: http://collections.ala.org.au/public/show/dr340 (source published on 2015-01-07)
Australian Museum. Australian Museum provider for OZCAM. Record ID: 860f595a-7414-4e25-a9b7-37523e49a1df. Source: http://collections.ala.org.au/public/show/dr340 (source published on 2015-01-07)
Australian Museum. Australian Museum provider for OZCAM. Record ID: 8afff92e-cb14-4e29-a79f-a5ef9cf8fe90. Source: http://collections.ala.org.au/public/show/dr340 (source published on 2015-01-07)
Australian Museum. Australian Museum provider for OZCAM. Record ID: 8c2c0950-feaa-4056-8f78-9e83ba65be08. Source: http://collections.ala.org.au/public/show/dr340 (source published on 2015-01-07)
Australian Museum. Australian Museum provider for OZCAM. Record ID: 9355b976-91e9-4e6e-b56b-34274e10c7ef. Source: http://collections.ala.org.au/public/show/dr340 (source published on 2015-01-07)
Australian Museum. Australian Museum provider for OZCAM. Record ID: a1828a8a-c02a-435b-8e19-cc8453cfa91f. Source: http://collections.ala.org.au/public/show/dr340 (source published on 2015-01-07)
Australian Museum. Australian Museum provider for OZCAM. Record ID: ba47b755-2aed-4eb4-9cf4-2dbb457e0d9b. Source: http://collections.ala.org.au/public/show/dr340 (source published on 2015-01-07)
Australian Museum. Australian Museum provider for OZCAM. Record ID: ee23e546-9479-4a1f-906f-2b96f5785706. Source: http://collections.ala.org.au/public/show/dr340 (source published on 2015-01-07)
Australian Museum. Australian Museum provider for OZCAM. Record ID: 1e855252-66f5-4911-a65d-f67b481d58a0. Source: http://collections.ala.org.au/public/show/dr340 (source published on 2015-01-07)
Australian Museum. Australian Museum provider for OZCAM. Record ID: 36985d65-bc90-4ccd-9f98-03e0318237c6. Source: http://collections.ala.org.au/public/show/dr340 (source published on 2015-01-07)
Australian Museum. Australian Museum provider for OZCAM. Record ID: 400883ee-e2c6-4c9a-87b5-d26d79050b05. Source: http://collections.ala.org.au/public/show/dr340 (source published on 2015-01-07)
Australian Museum. Australian Museum provider for OZCAM. Record ID: 438d4fd3-d4d8-4554-a600-ff113dd93dea. Source: http://collections.ala.org.au/public/show/dr340 (source published on 2015-01-07)
Australian Museum. Australian Museum provider for OZCAM. Record ID: 554ca45a-36ce-4fa2-8a06-2929541aa961. Source: http://collections.ala.org.au/public/show/dr340 (source published on 2015-01-07)
Australian Museum. Australian Museum provider for OZCAM. Record ID: 6203fac0-1294-42b7-9eb5-5418a1212fd0. Source: http://collections.ala.org.au/public/show/dr340 (source published on 2015-01-07)
Australian Museum. Australian Museum provider for OZCAM. Record ID: 643f8ff0-538f-48d6-bc87-9cf476b84121. Source: http://collections.ala.org.au/public/show/dr340 (source published on 2015-01-07)
Australian Museum. Australian Museum provider for OZCAM. Record ID: 6a10677e-86f9-4177-a911-956b9e017375. Source: http://collections.ala.org.au/public/show/dr340 (source published on 2015-01-07)
Australian Museum. Australian Museum provider for OZCAM. Record ID: 6d9982dc-828e-4b8f-a47a-4d90ee8e161b. Source: http://collections.ala.org.au/public/show/dr340 (source published on 2015-01-07)
Australian Museum. Australian Museum provider for OZCAM. Record ID: 9e3a3b84-02be-4d5c-8a86-f8766a79d26d. Source: http://collections.ala.org.au/public/show/dr340 (source published on 2015-01-07)
Australian Museum. Australian Museum provider for OZCAM. Record ID: ba3aedf3-1bc3-4bf1-924e-d365c1da13e1. Source: http://collections.ala.org.au/public/show/dr340 (source published on 2015-01-07)
Australian Museum. Australian Museum provider for OZCAM. Record ID: ba426e21-08de-42f9-838a-74186158d4d1. Source: http://collections.ala.org.au/public/show/dr340 (source published on 2015-01-07)
Australian Museum. Australian Museum provider for OZCAM. Record ID: c1042658-16e6-4092-b0e9-86e1170e589c. Source: http://collections.ala.org.au/public/show/dr340 (source published on 2015-01-07)
Australian Museum. Australian Museum provider for OZCAM. Record ID: d652b433-9382-410e-9bf2-e812e2b52790. Source: http://collections.ala.org.au/public/show/dr340 (source published on 2015-01-07)
Australian Museum. Australian Museum provider for OZCAM. Record ID: df58ecc3-c8b5-4e6a-82ba-3c828d8506e2. Source: http://collections.ala.org.au/public/show/dr340 (source published on 2015-01-07)
Australian Museum. Australian Museum provider for OZCAM. Record ID: e0ca4a59-a8b2-4241-8390-464fa610a8c8. Source: http://collections.ala.org.au/public/show/dr340 (source published on 2015-01-07)
Australian Museum. Australian Museum provider for OZCAM. Record ID: e94fdd64-461d-46de-85df-d6cadb2636d7. Source: http://collections.ala.org.au/public/show/dr340 (source published on 2015-01-07)
Australian Museum. Australian Museum provider for OZCAM. Record ID: f5fac3fb-8b53-485b-b6ca-b1f7a31c3d67. Source: http://collections.ala.org.au/public/show/dr340 (source published on 2015-01-07)
Australian Museum. Australian Museum provider for OZCAM. Record ID: ecaf7505-715e-40fd-888e-93066803bc72. Source: http://collections.ala.org.au/public/show/dr340 (source published on 2015-01-07)
Australian Museum. Australian Museum provider for OZCAM. Record ID: 04ee3b35-4b46-4790-b002-b3dc0c2caf37. Source: http://collections.ala.org.au/public/show/dr340 (source published on 2015-01-07)
Australian Museum. Australian Museum provider for OZCAM. Record ID: 1bbea13e-cc00-49d0-bd37-963dbb2669ef. Source: http://collections.ala.org.au/public/show/dr340 (source published on 2015-01-07)
Australian Museum. Australian Museum provider for OZCAM. Record ID: 2131798c-a878-4175-98bb-414e38ad934a. Source: http://collections.ala.org.au/public/show/dr340 (source published on 2015-01-07)
Australian Museum. Australian Museum provider for OZCAM. Record ID: 21d56301-8f2a-4d16-86d3-dca66f447ff7. Source: http://collections.ala.org.au/public/show/dr340 (source published on 2015-01-07)
Australian Museum. Australian Museum provider for OZCAM. Record ID: 3b24d594-8962-4398-bcfa-acde6f6723ab. Source: http://collections.ala.org.au/public/show/dr340 (source published on 2015-01-07)
Australian Museum. Australian Museum provider for OZCAM. Record ID: 48f730f8-488a-4c6f-bf4c-8794febccaf8. Source: http://collections.ala.org.au/public/show/dr340 (source published on 2015-01-07)
Australian Museum. Australian Museum provider for OZCAM. Record ID: 4ae64f31-fabc-41a7-af9c-15e052d6ed8f. Source: http://collections.ala.org.au/public/show/dr340 (source published on 2015-01-07)
Australian Museum. Australian Museum provider for OZCAM. Record ID: 5632c2ca-a9a7-4f67-aa01-e7380a398669. Source: http://collections.ala.org.au/public/show/dr340 (source published on 2015-01-07)
Australian Museum. Australian Museum provider for OZCAM. Record ID: 667c4acf-27dc-4cb6-93a9-f416d29eebd7. Source: http://collections.ala.org.au/public/show/dr340 (source published on 2015-01-07)
Australian Museum. Australian Museum provider for OZCAM. Record ID: 67da1a5d-8187-4dcd-b2dd-a2fe8fb1eede. Source: http://collections.ala.org.au/public/show/dr340 (source published on 2015-01-07)
Australian Museum. Australian Museum provider for OZCAM. Record ID: 74b71679-f5ee-402f-a982-db6653c07fb4. Source: http://collections.ala.org.au/public/show/dr340 (source published on 2015-01-07)
Australian Museum. Australian Museum provider for OZCAM. Record ID: 769b9d9b-e64a-4158-b31a-3011d03a867c. Source: http://collections.ala.org.au/public/show/dr340 (source published on 2015-01-07)
Australian Museum. Australian Museum provider for OZCAM. Record ID: 77d3abeb-a4fa-455c-b031-7c9a8f6e4935. Source: http://collections.ala.org.au/public/show/dr340 (source published on 2015-01-07)
Australian Museum. Australian Museum provider for OZCAM. Record ID: 7cc80463-8c01-4e8f-b21a-cc7d75a39ddf. Source: http://collections.ala.org.au/public/show/dr340 (source published on 2015-01-07)
Australian Museum. Australian Museum provider for OZCAM. Record ID: 958ea63f-00aa-4fed-b4e2-6aeeb875a7a3. Source: http://collections.ala.org.au/public/show/dr340 (source published on 2015-01-07)
Australian Museum. Australian Museum provider for OZCAM. Record ID: 9827da70-407e-4562-a73b-9d135034c56f. Source: http://collections.ala.org.au/public/show/dr340 (source published on 2015-01-07)
Australian Museum. Australian Museum provider for OZCAM. Record ID: 9f4c12bc-7fdd-4618-9879-6e92979c5561. Source: http://collections.ala.org.au/public/show/dr340 (source published on 2015-01-07)
Australian Museum. Australian Museum provider for OZCAM. Record ID: ae0381dc-1fe2-471b-a338-6bb07a1124a0. Source: http://collections.ala.org.au/public/show/dr340 (source published on 2015-01-07)
Australian Museum. Australian Museum provider for OZCAM. Record ID: b0c04890-6ef4-46d0-a3ed-0a2738fd1d91. Source: http://collections.ala.org.au/public/show/dr340 (source published on 2015-01-07)
Australian Museum. Australian Museum provider for OZCAM. Record ID: b502f786-e830-414d-9ca6-4dbd014a6462. Source: http://collections.ala.org.au/public/show/dr340 (source published on 2015-01-07)
Australian Museum. Australian Museum provider for OZCAM. Record ID: c94d2666-8adc-43af-986a-249f102eaf7a. Source: http://collections.ala.org.au/public/show/dr340 (source published on 2015-01-07)
Australian Museum. Australian Museum provider for OZCAM. Record ID: ce505385-0135-4b86-88c8-71f219f4545d. Source: http://collections.ala.org.au/public/show/dr340 (source published on 2015-01-07)
Australian Museum. Australian Museum provider for OZCAM. Record ID: d2c46049-1679-4c9e-97e6-b1578ebb5124. Source: http://collections.ala.org.au/public/show/dr340 (source published on 2015-01-07)
Australian Museum. Australian Museum provider for OZCAM. Record ID: e7b015ef-3434-4d3e-82c4-85d1946d6767. Source: http://collections.ala.org.au/public/show/dr340 (source published on 2015-01-07)
Australian Museum. Australian Museum provider for OZCAM. Record ID: e8797533-be93-4e68-afa4-11bddea75d1a. Source: http://collections.ala.org.au/public/show/dr340 (source published on 2015-01-07)
Australian Museum. Australian Museum provider for OZCAM. Record ID: eddbee4c-d7af-4796-aa34-e48399ffea28. Source: http://collections.ala.org.au/public/show/dr340 (source published on 2015-01-07)
Australian Museum. Australian Museum provider for OZCAM. Record ID: f1ad06a7-1026-418f-8a75-61e1037349f6. Source: http://collections.ala.org.au/public/show/dr340 (source published on 2015-01-07)
Australian Museum. Australian Museum provider for OZCAM. Record ID: f764cc0a-609d-4fc2-b625-942c1051511f. Source: http://collections.ala.org.au/public/show/dr340 (source published on 2015-01-07)
Australian Museum. Australian Museum provider for OZCAM. Record ID: 013e8c20-9960-4f63-af8c-8f837b72e4e4. Source: http://collections.ala.org.au/public/show/dr340 (source published on 2015-01-07)
Australian Museum. Australian Museum provider for OZCAM. Record ID: 0582c543-65e5-44e0-b234-0cb87fec0ddc. Source: http://collections.ala.org.au/public/show/dr340 (source published on 2015-01-07)
Australian Museum. Australian Museum provider for OZCAM. Record ID: 132c2237-32db-4cf2-a5c6-3914b51b7b6e. Source: http://collections.ala.org.au/public/show/dr340 (source published on 2015-01-07)
Australian Museum. Australian Museum provider for OZCAM. Record ID: 15977d45-cd09-4cb5-9a11-100c0e0ec5d3. Source: http://collections.ala.org.au/public/show/dr340 (source published on 2015-01-07)
Australian Museum. Australian Museum provider for OZCAM. Record ID: 1bbc3807-e12c-40eb-bb48-ec35d16eee67. Source: http://collections.ala.org.au/public/show/dr340 (source published on 2015-01-07)
Australian Museum. Australian Museum provider for OZCAM. Record ID: 23311d8c-40b2-4882-a5ee-3892584524b3. Source: http://collections.ala.org.au/public/show/dr340 (source published on 2015-01-07)
Australian Museum. Australian Museum provider for OZCAM. Record ID: 2569668b-7be4-4f0f-a589-e22bcc5c16cf. Source: http://collections.ala.org.au/public/show/dr340 (source published on 2015-01-07)
Australian Museum. Australian Museum provider for OZCAM. Record ID: 2728dc86-e660-4e7a-b0e5-6ca96248bee2. Source: http://collections.ala.org.au/public/show/dr340 (source published on 2015-01-07)
Australian Museum. Australian Museum provider for OZCAM. Record ID: 2b7cfb3b-343f-43b2-b3cb-b016cc9d21fc. Source: http://collections.ala.org.au/public/show/dr340 (source published on 2015-01-07)
Australian Museum. Australian Museum provider for OZCAM. Record ID: 3001f146-fc8a-46f1-acb2-42a0772a9264. Source: http://collections.ala.org.au/public/show/dr340 (source published on 2015-01-07)
Australian Museum. Australian Museum provider for OZCAM. Record ID: 58235989-4064-4f9c-9937-59239f15a9e3. Source: http://collections.ala.org.au/public/show/dr340 (source published on 2015-01-07)
Australian Museum. Australian Museum provider for OZCAM. Record ID: 586a30de-267c-4cc9-8da9-79d15bfab7c7. Source: http://collections.ala.org.au/public/show/dr340 (source published on 2015-01-07)
Australian Museum. Australian Museum provider for OZCAM. Record ID: 5c7b9aea-57a0-4185-8ec4-2cece33db884. Source: http://collections.ala.org.au/public/show/dr340 (source published on 2015-01-07)
Australian Museum. Australian Museum provider for OZCAM. Record ID: 7901fc82-43b3-4f1e-beca-72aa735259bb. Source: http://collections.ala.org.au/public/show/dr340 (source published on 2015-01-07)
Australian Museum. Australian Museum provider for OZCAM. Record ID: 8aa653b8-98fa-4ecb-961a-5f441b154d45. Source: http://collections.ala.org.au/public/show/dr340 (source published on 2015-01-07)
Australian Museum. Australian Museum provider for OZCAM. Record ID: 989ca163-7bd3-4f6b-8aa9-8e7420010306. Source: http://collections.ala.org.au/public/show/dr340 (source published on 2015-01-07)
Australian Museum. Australian Museum provider for OZCAM. Record ID: a7586054-4d5d-4dbf-b530-3584389e8a46. Source: http://collections.ala.org.au/public/show/dr340 (source published on 2015-01-07)
Australian Museum. Australian Museum provider for OZCAM. Record ID: add068a5-ac89-4dd6-a004-647c03491afb. Source: http://collections.ala.org.au/public/show/dr340 (source published on 2015-01-07)
Australian Museum. Australian Museum provider for OZCAM. Record ID: b23f6e43-f724-4d31-b409-85c8de7c962c. Source: http://collections.ala.org.au/public/show/dr340 (source published on 2015-01-07)
Australian Museum. Australian Museum provider for OZCAM. Record ID: b8b7c12e-e1d8-4b91-a634-a169a9e390b1. Source: http://collections.ala.org.au/public/show/dr340 (source published on 2015-01-07)
Australian Museum. Australian Museum provider for OZCAM. Record ID: c4265fc0-7bb9-4b58-b1af-7f8e16072ed5. Source: http://collections.ala.org.au/public/show/dr340 (source published on 2015-01-07)
Australian Museum. Australian Museum provider for OZCAM. Record ID: c7c63242-9079-46a5-a8b2-0a7a29d0ebc9. Source: http://collections.ala.org.au/public/show/dr340 (source published on 2015-01-07)
Australian Museum. Australian Museum provider for OZCAM. Record ID: dfa1e53a-64e5-4c5f-b405-05bf837a746a. Source: http://collections.ala.org.au/public/show/dr340 (source published on 2015-01-07)
Australian Museum. Australian Museum provider for OZCAM. Record ID: e0378f29-339b-4c50-86b8-5c0c000291d8. Source: http://collections.ala.org.au/public/show/dr340 (source published on 2015-01-07)
Australian Museum. Australian Museum provider for OZCAM. Record ID: ffa7a17c-f213-482a-aa40-986ae35528d1. Source: http://collections.ala.org.au/public/show/dr340 (source published on 2015-01-07)
Australian Museum. Australian Museum provider for OZCAM. Record ID: 04be58e7-842f-4198-bfc3-1204f18dab76. Source: http://collections.ala.org.au/public/show/dr340 (source published on 2015-01-07)
Australian Museum. Australian Museum provider for OZCAM. Record ID: 57ed925f-9c8d-424d-94c2-7e094f8c6d6d. Source: http://collections.ala.org.au/public/show/dr340 (source published on 2015-01-07)
Australian Museum. Australian Museum provider for OZCAM. Record ID: 5b7573db-d9c6-4209-92ee-82b8c9f68f70. Source: http://collections.ala.org.au/public/show/dr340 (source published on 2015-01-07)
Australian Museum. Australian Museum provider for OZCAM. Record ID: 6c7c2654-adcd-48ff-bfa5-3fcbcd9895d2. Source: http://collections.ala.org.au/public/show/dr340 (source published on 2015-01-07)
Australian Museum. Australian Museum provider for OZCAM. Record ID: 4e96f455-ceab-4cf1-a226-cfcc06ad42c2. Source: http://collections.ala.org.au/public/show/dr340 (source published on 2015-01-07)
Australian Museum. Australian Museum provider for OZCAM. Record ID: e3816e54-e780-48c2-b5f5-809e735ba950. Source: http://collections.ala.org.au/public/show/dr340 (source published on 2015-01-07)
Australian Museum. Australian Museum provider for OZCAM. Record ID: 56cdb124-f905-4ebf-a2c8-3965627219cd. Source: http://collections.ala.org.au/public/show/dr340 (source published on 2015-01-07)
Australian Museum. Australian Museum provider for OZCAM. Record ID: 93a1eb33-6e37-4848-98c3-0e152c857ebb. Source: http://collections.ala.org.au/public/show/dr340 (source published on 2015-01-07)
Australian Museum. Australian Museum provider for OZCAM. Record ID: 24a47fe7-730e-4d3d-a064-08422e7f8621. Source: http://collections.ala.org.au/public/show/dr340 (source published on 2015-01-07)
Australian Museum. Australian Museum provider for OZCAM. Record ID: 5fd618ef-c83a-4835-8c7e-47f131d5d8a0. Source: http://collections.ala.org.au/public/show/dr340 (source published on 2015-01-07)
Australian Museum. Australian Museum provider for OZCAM. Record ID: 79a8b7ce-77d5-4eb4-bab9-1c11a49402c5. Source: http://collections.ala.org.au/public/show/dr340 (source published on 2015-01-07)
Australian Museum. Australian Museum provider for OZCAM. Record ID: f676d277-1d83-4dde-aa6f-f67e43ee4522. Source: http://collections.ala.org.au/public/show/dr340 (source published on 2015-01-07)
Australian Museum. Australian Museum provider for OZCAM. Record ID: 21f26349-a341-4535-993a-bbe7ef81461d. Source: http://collections.ala.org.au/public/show/dr340 (source published on 2015-01-07)
Australian Museum. Australian Museum provider for OZCAM. Record ID: 42b7f127-1156-4d56-8902-8905faf938b9. Source: http://collections.ala.org.au/public/show/dr340 (source published on 2015-01-07)
Australian Museum. Australian Museum provider for OZCAM. Record ID: 4adcdf03-6c5e-4682-be18-e6574dba2ea7. Source: http://collections.ala.org.au/public/show/dr340 (source published on 2015-01-07)
Australian Museum. Australian Museum provider for OZCAM. Record ID: 79e586fc-9283-490a-b6ae-5f5141ea38e4. Source: http://collections.ala.org.au/public/show/dr340 (source published on 2015-01-07)
Australian Museum. Australian Museum provider for OZCAM. Record ID: 934b15de-d111-4235-80f1-b6fddad9ad5b. Source: http://collections.ala.org.au/public/show/dr340 (source published on 2015-01-07)
Australian Museum. Australian Museum provider for OZCAM. Record ID: 9af54646-5189-492a-b2d3-358648180785. Source: http://collections.ala.org.au/public/show/dr340 (source published on 2015-01-07)
Australian Museum. Australian Museum provider for OZCAM. Record ID: b459f510-6b8a-44a6-93ed-fa4819ddb3a1. Source: http://collections.ala.org.au/public/show/dr340 (source published on 2015-01-07)
Australian Museum. Australian Museum provider for OZCAM. Record ID: dc0af925-51f7-4e49-8467-8553f4f86b98. Source: http://collections.ala.org.au/public/show/dr340 (source published on 2015-01-07)
Australian Museum. Australian Museum provider for OZCAM. Record ID: ed9dcc41-69a5-48af-9ca3-80d52d0bcea3. Source: http://collections.ala.org.au/public/show/dr340 (source published on 2015-01-07)
Australian Museum. Australian Museum provider for OZCAM. Record ID: 1981513c-d429-45a8-b53e-13d29a1e5d63. Source: http://collections.ala.org.au/public/show/dr340 (source published on 2015-01-07)
Australian Museum. Australian Museum provider for OZCAM. Record ID: 9976647b-43c0-453b-8272-01244c3c2e7d. Source: http://collections.ala.org.au/public/show/dr340 (source published on 2015-01-07)
Australian Museum. Australian Museum provider for OZCAM. Record ID: 9d1a1ad7-4be6-45ce-9a75-61a34dda7014. Source: http://collections.ala.org.au/public/show/dr340 (source published on 2015-01-07)
Australian Museum. Australian Museum provider for OZCAM. Record ID: 074687b0-09b9-49db-8c80-16f4481eb85a. Source: http://collections.ala.org.au/public/show/dr340 (source published on 2015-01-07)
Australian Museum. Australian Museum provider for OZCAM. Record ID: 0b3c52f6-55d2-4c2d-b1e9-2494b45b7ddc. Source: http://collections.ala.org.au/public/show/dr340 (source published on 2015-01-07)
Australian Museum. Australian Museum provider for OZCAM. Record ID: 11bd7fcf-46bd-420e-97f1-3ca24da4457a. Source: http://collections.ala.org.au/public/show/dr340 (source published on 2015-01-07)
Australian Museum. Australian Museum provider for OZCAM. Record ID: 39127ca6-4e99-4d66-996a-55b031cdad9b. Source: http://collections.ala.org.au/public/show/dr340 (source published on 2015-01-07)
Australian Museum. Australian Museum provider for OZCAM. Record ID: 5abc4e55-59db-4c19-baf6-ffdb4a923e1c. Source: http://collections.ala.org.au/public/show/dr340 (source published on 2015-01-07)
Australian Museum. Australian Museum provider for OZCAM. Record ID: 63f7824b-06d2-4e7e-be73-88fde8a2cd8f. Source: http://collections.ala.org.au/public/show/dr340 (source published on 2015-01-07)
Australian Museum. Australian Museum provider for OZCAM. Record ID: 82da82d7-5e14-4d73-8988-633570f1dee5. Source: http://collections.ala.org.au/public/show/dr340 (source published on 2015-01-07)
Australian Museum. Australian Museum provider for OZCAM. Record ID: 8ed24a00-dd1c-4d5f-8785-1f1e6f0eb126. Source: http://collections.ala.org.au/public/show/dr340 (source published on 2015-01-07)
Australian Museum. Australian Museum provider for OZCAM. Record ID: 96a4f270-4771-474b-ac27-f3c8c49c757f. Source: http://collections.ala.org.au/public/show/dr340 (source published on 2015-01-07)
Australian Museum. Australian Museum provider for OZCAM. Record ID: a89a246f-8050-44e7-8f87-6d462e708d8b. Source: http://collections.ala.org.au/public/show/dr340 (source published on 2015-01-07)
Australian Museum. Australian Museum provider for OZCAM. Record ID: aed96cb0-e3c0-4929-a065-b31846bb1c97. Source: http://collections.ala.org.au/public/show/dr340 (source published on 2015-01-07)
Australian Museum. Australian Museum provider for OZCAM. Record ID: b0607c40-eae8-45bc-8361-2dbbead3259c. Source: http://collections.ala.org.au/public/show/dr340 (source published on 2015-01-07)
Australian Museum. Australian Museum provider for OZCAM. Record ID: b40b306f-4d09-47be-839c-cc0443faa84f. Source: http://collections.ala.org.au/public/show/dr340 (source published on 2015-01-07)
Australian Museum. Australian Museum provider for OZCAM. Record ID: b5fb297d-ecf7-4d5c-968f-396267f3d57c. Source: http://collections.ala.org.au/public/show/dr340 (source published on 2015-01-07)
Australian Museum. Australian Museum provider for OZCAM. Record ID: c599c100-bc9b-4f40-a58e-500e3f68ee56. Source: http://collections.ala.org.au/public/show/dr340 (source published on 2015-01-07)
Australian Museum. Australian Museum provider for OZCAM. Record ID: d0e07c08-23bf-4dfd-9cdc-1084cacfcc25. Source: http://collections.ala.org.au/public/show/dr340 (source published on 2015-01-07)
Australian Museum. Australian Museum provider for OZCAM. Record ID: d7851ff0-566e-4420-a1a4-22c3096984bb. Source: http://collections.ala.org.au/public/show/dr340 (source published on 2015-01-07)
Australian Museum. Australian Museum provider for OZCAM. Record ID: e4a37e6e-ed80-4c91-b702-1f91c759ac36. Source: http://collections.ala.org.au/public/show/dr340 (source published on 2015-01-07)
Australian Museum. Australian Museum provider for OZCAM. Record ID: ef93da32-b88c-4f6e-89fa-dd2a1363c2b2. Source: http://collections.ala.org.au/public/show/dr340 (source published on 2015-01-07)
Australian Museum. Australian Museum provider for OZCAM. Record ID: 15df58c7-f3bb-4c29-a3ae-7c0692d4533c. Source: http://collections.ala.org.au/public/show/dr340 (source published on 2015-01-07)
Australian Museum. Australian Museum provider for OZCAM. Record ID: 1ff05a8b-9c42-412a-b0c9-6506c4bbdf16. Source: http://collections.ala.org.au/public/show/dr340 (source published on 2015-01-07)
Australian Museum. Australian Museum provider for OZCAM. Record ID: 4368a8be-8339-4109-b957-ad8c7441b4cb. Source: http://collections.ala.org.au/public/show/dr340 (source published on 2015-01-07)
Australian Museum. Australian Museum provider for OZCAM. Record ID: 50ec29fd-4909-4ea0-942d-4ae12380601e. Source: http://collections.ala.org.au/public/show/dr340 (source published on 2015-01-07)
Australian Museum. Australian Museum provider for OZCAM. Record ID: 58ad408d-a7a5-48f3-8b2e-28af10a5603f. Source: http://collections.ala.org.au/public/show/dr340 (source published on 2015-01-07)
Australian Museum. Australian Museum provider for OZCAM. Record ID: 68409d9c-d2bb-453b-9a69-14e06cb2185f. Source: http://collections.ala.org.au/public/show/dr340 (source published on 2015-01-07)
Australian Museum. Australian Museum provider for OZCAM. Record ID: 6ad01d9b-06e6-417a-a6bd-e02610d15403. Source: http://collections.ala.org.au/public/show/dr340 (source published on 2015-01-07)
Australian Museum. Australian Museum provider for OZCAM. Record ID: 6befa59a-7f6a-4015-9b71-ae5cf518641d. Source: http://collections.ala.org.au/public/show/dr340 (source published on 2015-01-07)
Australian Museum. Australian Museum provider for OZCAM. Record ID: 794989e0-9284-4cc4-9f5d-86a3379a714a. Source: http://collections.ala.org.au/public/show/dr340 (source published on 2015-01-07)
Australian Museum. Australian Museum provider for OZCAM. Record ID: 8ac6bf47-6f27-4260-86e0-8f12be95e7a5. Source: http://collections.ala.org.au/public/show/dr340 (source published on 2015-01-07)
Australian Museum. Australian Museum provider for OZCAM. Record ID: 98210005-961a-49cb-b49a-74dbe8047dd5. Source: http://collections.ala.org.au/public/show/dr340 (source published on 2015-01-07)
Australian Museum. Australian Museum provider for OZCAM. Record ID: ace8109d-925e-48d7-80be-c303f8d0381e. Source: http://collections.ala.org.au/public/show/dr340 (source published on 2015-01-07)
Australian Museum. Australian Museum provider for OZCAM. Record ID: ae3d8e35-141b-46b4-a495-3e642548d187. Source: http://collections.ala.org.au/public/show/dr340 (source published on 2015-01-07)
Australian Museum. Australian Museum provider for OZCAM. Record ID: db7c8da1-d9c0-42ae-8ccb-8ac3f404be7c. Source: http://collections.ala.org.au/public/show/dr340 (source published on 2015-01-07)
Australian Museum. Australian Museum provider for OZCAM. Record ID: e3e05951-fe52-44a7-8c59-3bb6f827012c. Source: http://collections.ala.org.au/public/show/dr340 (source published on 2015-01-07)
Australian Museum. Australian Museum provider for OZCAM. Record ID: ea5af17a-dccc-4191-8131-e349a14215db. Source: http://collections.ala.org.au/public/show/dr340 (source published on 2015-01-07)
Australian Museum. Australian Museum provider for OZCAM. Record ID: 8ab6eef5-6f98-4573-a395-8e55ef8e2250. Source: http://collections.ala.org.au/public/show/dr340 (source published on 2015-01-07)
Australian Museum. Australian Museum provider for OZCAM. Record ID: 047edd12-a15a-4e28-877e-15129c82666f. Source: http://collections.ala.org.au/public/show/dr340 (source published on 2015-01-07)
Australian Museum. Australian Museum provider for OZCAM. Record ID: 081e26d6-ce11-4ba1-982f-37125f929e08. Source: http://collections.ala.org.au/public/show/dr340 (source published on 2015-01-07)
Australian Museum. Australian Museum provider for OZCAM. Record ID: 0c182763-10fd-4d17-8586-fa76f3372f19. Source: http://collections.ala.org.au/public/show/dr340 (source published on 2015-01-07)
Australian Museum. Australian Museum provider for OZCAM. Record ID: 1417edc7-859a-4663-abe4-2e0f4b8dcdb2. Source: http://collections.ala.org.au/public/show/dr340 (source published on 2015-01-07)
Australian Museum. Australian Museum provider for OZCAM. Record ID: 19d9b706-c241-4eee-9acf-3e680efae232. Source: http://collections.ala.org.au/public/show/dr340 (source published on 2015-01-07)
Australian Museum. Australian Museum provider for OZCAM. Record ID: 2fe1e5bd-e7ba-4187-9ddf-c1625d5108f3. Source: http://collections.ala.org.au/public/show/dr340 (source published on 2015-01-07)
Australian Museum. Australian Museum provider for OZCAM. Record ID: 3d6379bc-d97f-489c-99c7-71f4f9c7d934. Source: http://collections.ala.org.au/public/show/dr340 (source published on 2015-01-07)
Australian Museum. Australian Museum provider for OZCAM. Record ID: 40a1ac4e-67e5-4909-8269-9d25e4116a57. Source: http://collections.ala.org.au/public/show/dr340 (source published on 2015-01-07)
Australian Museum. Australian Museum provider for OZCAM. Record ID: 4caa06b5-29d0-4157-bc70-ff3476766838. Source: http://collections.ala.org.au/public/show/dr340 (source published on 2015-01-07)
Australian Museum. Australian Museum provider for OZCAM. Record ID: 51acc903-8395-4204-9e17-e05852138a4f. Source: http://collections.ala.org.au/public/show/dr340 (source published on 2015-01-07)
Australian Museum. Australian Museum provider for OZCAM. Record ID: 5390320e-2a43-4ebf-88ca-3cf3d2e40433. Source: http://collections.ala.org.au/public/show/dr340 (source published on 2015-01-07)
Australian Museum. Australian Museum provider for OZCAM. Record ID: 578999c7-bb2a-472f-a1db-4dece67ff0f9. Source: http://collections.ala.org.au/public/show/dr340 (source published on 2015-01-07)
Australian Museum. Australian Museum provider for OZCAM. Record ID: 5a39d37f-6b4b-47e1-8f0b-8380bf583531. Source: http://collections.ala.org.au/public/show/dr340 (source published on 2015-01-07)
Australian Museum. Australian Museum provider for OZCAM. Record ID: 6babc64f-913f-4c14-966b-ce8ec1d53c68. Source: http://collections.ala.org.au/public/show/dr340 (source published on 2015-01-07)
Australian Museum. Australian Museum provider for OZCAM. Record ID: 6da55c4a-3e93-4754-97ae-47bfa21ae238. Source: http://collections.ala.org.au/public/show/dr340 (source published on 2015-01-07)
Australian Museum. Australian Museum provider for OZCAM. Record ID: 74e2f0b0-27de-4074-b1e6-88d0ddd34575. Source: http://collections.ala.org.au/public/show/dr340 (source published on 2015-01-07)
Australian Museum. Australian Museum provider for OZCAM. Record ID: 7a3767a9-11c3-46a6-977c-c24fad44f983. Source: http://collections.ala.org.au/public/show/dr340 (source published on 2015-01-07)
Australian Museum. Australian Museum provider for OZCAM. Record ID: a61328dc-7294-4b20-bca4-729c121bcde8. Source: http://collections.ala.org.au/public/show/dr340 (source published on 2015-01-07)
Australian Museum. Australian Museum provider for OZCAM. Record ID: abd66f53-8af7-42e8-bc1b-6c6e871e11e7. Source: http://collections.ala.org.au/public/show/dr340 (source published on 2015-01-07)
Australian Museum. Australian Museum provider for OZCAM. Record ID: b5c4f221-5b10-483a-bab9-0f9176a18935. Source: http://collections.ala.org.au/public/show/dr340 (source published on 2015-01-07)
Australian Museum. Australian Museum provider for OZCAM. Record ID: c389cd85-e075-409b-b7e1-f763c8843eb7. Source: http://collections.ala.org.au/public/show/dr340 (source published on 2015-01-07)
Australian Museum. Australian Museum provider for OZCAM. Record ID: e9ce5697-31bb-47ba-aa41-3c63dcdb5b9b. Source: http://collections.ala.org.au/public/show/dr340 (source published on 2015-01-07)
Australian Museum. Australian Museum provider for OZCAM. Record ID: ec6b9287-a03c-4033-bfb9-6a36d2fab693. Source: http://collections.ala.org.au/public/show/dr340 (source published on 2015-01-07)
Australian Museum. Australian Museum provider for OZCAM. Record ID: f6113d3d-452c-4824-abe0-6de2042458cf. Source: http://collections.ala.org.au/public/show/dr340 (source published on 2015-01-07)
Australian Museum. Australian Museum provider for OZCAM. Record ID: f735a719-7ced-49b5-b45f-fc2967abd5a6. Source: http://collections.ala.org.au/public/show/dr340 (source published on 2015-01-07)
Australian Museum. Australian Museum provider for OZCAM. Record ID: f7a6e3d9-9923-4064-963d-dddde4d8f820. Source: http://collections.ala.org.au/public/show/dr340 (source published on 2015-01-07)
Australian Museum. Australian Museum provider for OZCAM. Record ID: fc3cb1e5-951d-4b34-950b-2c40f85d963b. Source: http://collections.ala.org.au/public/show/dr340 (source published on 2015-01-07)
Australian Museum. Australian Museum provider for OZCAM. Record ID: 126c8c14-1f2e-475a-9209-9169fdfcc0b0. Source: http://collections.ala.org.au/public/show/dr340 (source published on 2015-01-07)
Australian Museum. Australian Museum provider for OZCAM. Record ID: 1bece501-26fb-4b82-8eac-9b4fffb3725b. Source: http://collections.ala.org.au/public/show/dr340 (source published on 2015-01-07)
Australian Museum. Australian Museum provider for OZCAM. Record ID: 3338b230-d079-4f63-b779-303450f78035. Source: http://collections.ala.org.au/public/show/dr340 (source published on 2015-01-07)
Australian Museum. Australian Museum provider for OZCAM. Record ID: 49f35745-3231-4845-9c4d-98e4af1bf555. Source: http://collections.ala.org.au/public/show/dr340 (source published on 2015-01-07)
Australian Museum. Australian Museum provider for OZCAM. Record ID: 789c846d-6508-4fd5-9d71-21eb61717b01. Source: http://collections.ala.org.au/public/show/dr340 (source published on 2015-01-07)
Australian Museum. Australian Museum provider for OZCAM. Record ID: 7be2f97b-1184-49ba-97ed-96f59a80fd52. Source: http://collections.ala.org.au/public/show/dr340 (source published on 2015-01-07)
Australian Museum. Australian Museum provider for OZCAM. Record ID: 85449c9c-87cd-4b18-88b2-5d81e0c2947d. Source: http://collections.ala.org.au/public/show/dr340 (source published on 2015-01-07)
Australian Museum. Australian Museum provider for OZCAM. Record ID: 8e6811a4-68f0-4bea-8054-b433fd88e8c7. Source: http://collections.ala.org.au/public/show/dr340 (source published on 2015-01-07)
Australian Museum. Australian Museum provider for OZCAM. Record ID: a4feccd5-076d-4e85-ba07-6ace5e63c4a1. Source: http://collections.ala.org.au/public/show/dr340 (source published on 2015-01-07)
Australian Museum. Australian Museum provider for OZCAM. Record ID: a526f401-07e1-48db-b895-29866f6f642b. Source: http://collections.ala.org.au/public/show/dr340 (source published on 2015-01-07)
Australian Museum. Australian Museum provider for OZCAM. Record ID: b8a006fd-674e-4155-812f-58c73400c319. Source: http://collections.ala.org.au/public/show/dr340 (source published on 2015-01-07)
Australian Museum. Australian Museum provider for OZCAM. Record ID: c09a7018-7eb6-4311-9ec6-e3e554f66a97. Source: http://collections.ala.org.au/public/show/dr340 (source published on 2015-01-07)
Australian Museum. Australian Museum provider for OZCAM. Record ID: c97b3adb-ab5e-4896-bb21-ecf0f14454a1. Source: http://collections.ala.org.au/public/show/dr340 (source published on 2015-01-07)
Australian Museum. Australian Museum provider for OZCAM. Record ID: dd300842-150c-4e42-ae99-42ed961e0954. Source: http://collections.ala.org.au/public/show/dr340 (source published on 2015-01-07)
Australian Museum. Australian Museum provider for OZCAM. Record ID: b6508c6d-4877-43f5-a9d4-5ccaa80d9708. Source: http://collections.ala.org.au/public/show/dr340 (source published on 2015-01-07)
Australian Museum. Australian Museum provider for OZCAM. Record ID: 11a11885-bc0e-49b5-bbe0-7d14203af950. Source: http://collections.ala.org.au/public/show/dr340 (source published on 2015-01-07)
Australian Museum. Australian Museum provider for OZCAM. Record ID: bf1d74e7-2d83-4b95-a624-0c8f711ecce6. Source: http://collections.ala.org.au/public/show/dr340 (source published on 2015-01-07)
Australian Museum. Australian Museum provider for OZCAM. Record ID: 02e96ddf-9737-4d8b-890e-d849cd3bf2f9. Source: http://collections.ala.org.au/public/show/dr340 (source published on 2015-01-07)
Australian Museum. Australian Museum provider for OZCAM. Record ID: 03107fce-c870-474a-a8eb-40292e3a6425. Source: http://collections.ala.org.au/public/show/dr340 (source published on 2015-01-07)
Australian Museum. Australian Museum provider for OZCAM. Record ID: 060e3c92-5de7-43b0-a541-17a6a2ba624e. Source: http://collections.ala.org.au/public/show/dr340 (source published on 2015-01-07)
Australian Museum. Australian Museum provider for OZCAM. Record ID: 06a6e3d1-a45c-4ab3-b168-7ceab227ada2. Source: http://collections.ala.org.au/public/show/dr340 (source published on 2015-01-07)
Australian Museum. Australian Museum provider for OZCAM. Record ID: 0714ef37-86b1-4001-a032-3a385893da03. Source: http://collections.ala.org.au/public/show/dr340 (source published on 2015-01-07)
Australian Museum. Australian Museum provider for OZCAM. Record ID: 0730fc8f-8951-4567-9542-0a6f02b2aa0f. Source: http://collections.ala.org.au/public/show/dr340 (source published on 2015-01-07)
Australian Museum. Australian Museum provider for OZCAM. Record ID: 081823f0-9a57-457c-ae4e-e6df38b93a8d. Source: http://collections.ala.org.au/public/show/dr340 (source published on 2015-01-07)
Australian Museum. Australian Museum provider for OZCAM. Record ID: 0931130b-ca1e-408d-85eb-4c10c71f401e. Source: http://collections.ala.org.au/public/show/dr340 (source published on 2015-01-07)
Australian Museum. Australian Museum provider for OZCAM. Record ID: 0ab3135c-d69f-4ede-807d-e2175b40c1d9. Source: http://collections.ala.org.au/public/show/dr340 (source published on 2015-01-07)
Australian Museum. Australian Museum provider for OZCAM. Record ID: 0e108121-af3a-4987-9e73-78f246785b04. Source: http://collections.ala.org.au/public/show/dr340 (source published on 2015-01-07)
Australian Museum. Australian Museum provider for OZCAM. Record ID: 0e9aab55-4ad5-4ef9-9fd1-8f97d8bc21c3. Source: http://collections.ala.org.au/public/show/dr340 (source published on 2015-01-07)
Australian Museum. Australian Museum provider for OZCAM. Record ID: 0fc506b0-9b1e-4f14-846c-4983fd339fce. Source: http://collections.ala.org.au/public/show/dr340 (source published on 2015-01-07)
Australian Museum. Australian Museum provider for OZCAM. Record ID: 110b4541-c87c-4028-a892-50762e8ea7bd. Source: http://collections.ala.org.au/public/show/dr340 (source published on 2015-01-07)
Australian Museum. Australian Museum provider for OZCAM. Record ID: 118b2281-f567-4d46-8e88-f4ee5a39632d. Source: http://collections.ala.org.au/public/show/dr340 (source published on 2015-01-07)
Australian Museum. Australian Museum provider for OZCAM. Record ID: 13c88efe-e3f7-4ba2-8805-5d6535c0e841. Source: http://collections.ala.org.au/public/show/dr340 (source published on 2015-01-07)
Australian Museum. Australian Museum provider for OZCAM. Record ID: 140a68e0-4b1b-479d-9449-783800a38583. Source: http://collections.ala.org.au/public/show/dr340 (source published on 2015-01-07)
Australian Museum. Australian Museum provider for OZCAM. Record ID: 14f72fa3-0e58-44cf-b582-a20c6b51f670. Source: http://collections.ala.org.au/public/show/dr340 (source published on 2015-01-07)
Australian Museum. Australian Museum provider for OZCAM. Record ID: 15389ecf-3656-477b-b525-23a58c876670. Source: http://collections.ala.org.au/public/show/dr340 (source published on 2015-01-07)
Australian Museum. Australian Museum provider for OZCAM. Record ID: 16a1b1c1-a0de-4f09-b28c-571d5d61e9ea. Source: http://collections.ala.org.au/public/show/dr340 (source published on 2015-01-07)
Australian Museum. Australian Museum provider for OZCAM. Record ID: 177b4203-a26b-4fbe-a824-bc49b2635711. Source: http://collections.ala.org.au/public/show/dr340 (source published on 2015-01-07)
Australian Museum. Australian Museum provider for OZCAM. Record ID: 18121d29-5cfa-43c4-9311-90d7a8f96bfa. Source: http://collections.ala.org.au/public/show/dr340 (source published on 2015-01-07)
Australian Museum. Australian Museum provider for OZCAM. Record ID: 192fe026-1550-4003-8e49-484a3152c1cf. Source: http://collections.ala.org.au/public/show/dr340 (source published on 2015-01-07)
Australian Museum. Australian Museum provider for OZCAM. Record ID: 1973a677-7ef4-40bc-bd9f-ec2865cc6737. Source: http://collections.ala.org.au/public/show/dr340 (source published on 2015-01-07)
Australian Museum. Australian Museum provider for OZCAM. Record ID: 1d2215c2-23e4-4621-931e-bd83d3f7bf0a. Source: http://collections.ala.org.au/public/show/dr340 (source published on 2015-01-07)
Australian Museum. Australian Museum provider for OZCAM. Record ID: 1e46a393-cb32-4930-a886-5aba7c656028. Source: http://collections.ala.org.au/public/show/dr340 (source published on 2015-01-07)
Australian Museum. Australian Museum provider for OZCAM. Record ID: 1e965a90-3d15-4c9a-930e-dd6a9136f73c. Source: http://collections.ala.org.au/public/show/dr340 (source published on 2015-01-07)
Australian Museum. Australian Museum provider for OZCAM. Record ID: 1ebb0c67-e5d7-4e20-9864-b17c8a610c90. Source: http://collections.ala.org.au/public/show/dr340 (source published on 2015-01-07)
Australian Museum. Australian Museum provider for OZCAM. Record ID: 1f05fe03-d024-47b1-99ea-47481ee3c3c3. Source: http://collections.ala.org.au/public/show/dr340 (source published on 2015-01-07)
Australian Museum. Australian Museum provider for OZCAM. Record ID: 20b3e126-4663-4866-a37e-6439c019901b. Source: http://collections.ala.org.au/public/show/dr340 (source published on 2015-01-07)
Australian Museum. Australian Museum provider for OZCAM. Record ID: 20c1f433-8039-44b3-964a-3fa812df5f6e. Source: http://collections.ala.org.au/public/show/dr340 (source published on 2015-01-07)
Australian Museum. Australian Museum provider for OZCAM. Record ID: 23bdc0ac-79c6-496c-bf05-62bb38c7364c. Source: http://collections.ala.org.au/public/show/dr340 (source published on 2015-01-07)
Australian Museum. Australian Museum provider for OZCAM. Record ID: 2502295e-9407-49cb-a51f-50e58b981224. Source: http://collections.ala.org.au/public/show/dr340 (source published on 2015-01-07)
Australian Museum. Australian Museum provider for OZCAM. Record ID: 25090cda-9ed9-4d03-a5b9-469ec93af82f. Source: http://collections.ala.org.au/public/show/dr340 (source published on 2015-01-07)
Australian Museum. Australian Museum provider for OZCAM. Record ID: 25d27d00-1ebf-4ae3-862c-9b49fd6047d4. Source: http://collections.ala.org.au/public/show/dr340 (source published on 2015-01-07)
Australian Museum. Australian Museum provider for OZCAM. Record ID: 26f3be32-2b32-4532-ae35-bc483d2f9796. Source: http://collections.ala.org.au/public/show/dr340 (source published on 2015-01-07)
Australian Museum. Australian Museum provider for OZCAM. Record ID: 276b9c0c-acd4-4bf9-9327-d618fddbcf4c. Source: http://collections.ala.org.au/public/show/dr340 (source published on 2015-01-07)
Australian Museum. Australian Museum provider for OZCAM. Record ID: 2a7e6810-d460-4747-af59-f46f33237bf3. Source: http://collections.ala.org.au/public/show/dr340 (source published on 2015-01-07)
Australian Museum. Australian Museum provider for OZCAM. Record ID: 2ca55138-e1e8-4339-857d-8219e2e1e67a. Source: http://collections.ala.org.au/public/show/dr340 (source published on 2015-01-07)
Australian Museum. Australian Museum provider for OZCAM. Record ID: 2e82c1bf-96a7-469b-bcaf-19922630049d. Source: http://collections.ala.org.au/public/show/dr340 (source published on 2015-01-07)
Australian Museum. Australian Museum provider for OZCAM. Record ID: 2f460479-c77f-4bdd-b6b3-8ea8744a92ef. Source: http://collections.ala.org.au/public/show/dr340 (source published on 2015-01-07)
Australian Museum. Australian Museum provider for OZCAM. Record ID: 349c44a4-87b0-4bf8-87a9-d97b1a322e8b. Source: http://collections.ala.org.au/public/show/dr340 (source published on 2015-01-07)
Australian Museum. Australian Museum provider for OZCAM. Record ID: 34d8cbb7-ef02-45f2-8cf7-e42c122cecd3. Source: http://collections.ala.org.au/public/show/dr340 (source published on 2015-01-07)
Australian Museum. Australian Museum provider for OZCAM. Record ID: 37f07ecd-fdcb-4a6b-bd62-9e9d0ec07bb0. Source: http://collections.ala.org.au/public/show/dr340 (source published on 2015-01-07)
Australian Museum. Australian Museum provider for OZCAM. Record ID: 39f8fb74-9f1b-4ef0-b117-08e30b598414. Source: http://collections.ala.org.au/public/show/dr340 (source published on 2015-01-07)
Australian Museum. Australian Museum provider for OZCAM. Record ID: 3d331b57-0b0f-421b-98f1-f68a9ca15bbb. Source: http://collections.ala.org.au/public/show/dr340 (source published on 2015-01-07)
Australian Museum. Australian Museum provider for OZCAM. Record ID: 3f973fa6-763c-48a6-8357-bcb64e04050c. Source: http://collections.ala.org.au/public/show/dr340 (source published on 2015-01-07)
Australian Museum. Australian Museum provider for OZCAM. Record ID: 40788ea8-2129-470d-a624-c562860ce9f2. Source: http://collections.ala.org.au/public/show/dr340 (source published on 2015-01-07)
Australian Museum. Australian Museum provider for OZCAM. Record ID: 4149193b-029c-4a00-b428-e08c75121dfd. Source: http://collections.ala.org.au/public/show/dr340 (source published on 2015-01-07)
Australian Museum. Australian Museum provider for OZCAM. Record ID: 433aaea9-db58-46da-8c79-71333c68ed6a. Source: http://collections.ala.org.au/public/show/dr340 (source published on 2015-01-07)
Australian Museum. Australian Museum provider for OZCAM. Record ID: 464ecaa8-2c2f-406f-a874-1072ff6a96e7. Source: http://collections.ala.org.au/public/show/dr340 (source published on 2015-01-07)
Australian Museum. Australian Museum provider for OZCAM. Record ID: 46b3a95b-ee40-487c-8de8-f0836319fa61. Source: http://collections.ala.org.au/public/show/dr340 (source published on 2015-01-07)
Australian Museum. Australian Museum provider for OZCAM. Record ID: 46eca1fe-e738-43a5-8b3f-5c4ec647fbd8. Source: http://collections.ala.org.au/public/show/dr340 (source published on 2015-01-07)
Australian Museum. Australian Museum provider for OZCAM. Record ID: 47d09117-9f09-42cf-97f2-9e9f0776132c. Source: http://collections.ala.org.au/public/show/dr340 (source published on 2015-01-07)
Australian Museum. Australian Museum provider for OZCAM. Record ID: 4860af19-24e7-4449-ba9c-88468d09846b. Source: http://collections.ala.org.au/public/show/dr340 (source published on 2015-01-07)
Australian Museum. Australian Museum provider for OZCAM. Record ID: 4a747867-f5dd-4fda-9f56-a2e7e6ce5562. Source: http://collections.ala.org.au/public/show/dr340 (source published on 2015-01-07)
Australian Museum. Australian Museum provider for OZCAM. Record ID: 4e81b423-a842-42db-8778-ca50e2335ddc. Source: http://collections.ala.org.au/public/show/dr340 (source published on 2015-01-07)
Australian Museum. Australian Museum provider for OZCAM. Record ID: 4efd67a9-a122-4694-8056-48126de51a77. Source: http://collections.ala.org.au/public/show/dr340 (source published on 2015-01-07)
Australian Museum. Australian Museum provider for OZCAM. Record ID: 52674fe9-8c67-4350-8672-a784f6224129. Source: http://collections.ala.org.au/public/show/dr340 (source published on 2015-01-07)
Australian Museum. Australian Museum provider for OZCAM. Record ID: 53b94bcd-3e79-4ab1-b261-f91ec1e49bfa. Source: http://collections.ala.org.au/public/show/dr340 (source published on 2015-01-07)
Australian Museum. Australian Museum provider for OZCAM. Record ID: 53e0a0fa-405b-4e2b-a007-0937bbd91491. Source: http://collections.ala.org.au/public/show/dr340 (source published on 2015-01-07)
Australian Museum. Australian Museum provider for OZCAM. Record ID: 551fc464-d97a-450a-9795-1715fb9fa458. Source: http://collections.ala.org.au/public/show/dr340 (source published on 2015-01-07)
Australian Museum. Australian Museum provider for OZCAM. Record ID: 579721a7-7ac1-43bc-be7f-3533f9b12fb0. Source: http://collections.ala.org.au/public/show/dr340 (source published on 2015-01-07)
Australian Museum. Australian Museum provider for OZCAM. Record ID: 58a8f96c-c577-458a-9df1-f1d91de5e103. Source: http://collections.ala.org.au/public/show/dr340 (source published on 2015-01-07)
Australian Museum. Australian Museum provider for OZCAM. Record ID: 58b0a68d-0d88-4ef7-8b0b-b783b2960e19. Source: http://collections.ala.org.au/public/show/dr340 (source published on 2015-01-07)
Australian Museum. Australian Museum provider for OZCAM. Record ID: 5a74913f-75a1-4179-bd27-0b8c22116dc9. Source: http://collections.ala.org.au/public/show/dr340 (source published on 2015-01-07)
Australian Museum. Australian Museum provider for OZCAM. Record ID: 5b72390f-8c09-4914-8205-acb9a58dbd76. Source: http://collections.ala.org.au/public/show/dr340 (source published on 2015-01-07)
Australian Museum. Australian Museum provider for OZCAM. Record ID: 5cd4413e-f736-4280-9b0a-77c673ea1c05. Source: http://collections.ala.org.au/public/show/dr340 (source published on 2015-01-07)
Australian Museum. Australian Museum provider for OZCAM. Record ID: 5d8b4591-28ef-47b2-a5dd-da1a057fa55f. Source: http://collections.ala.org.au/public/show/dr340 (source published on 2015-01-07)
Australian Museum. Australian Museum provider for OZCAM. Record ID: 5ee07b57-4cf8-4cc9-8d65-0034c09b5ba2. Source: http://collections.ala.org.au/public/show/dr340 (source published on 2015-01-07)
Australian Museum. Australian Museum provider for OZCAM. Record ID: 5f01fbdb-cb35-40f7-9b22-b889e73f4a00. Source: http://collections.ala.org.au/public/show/dr340 (source published on 2015-01-07)
Australian Museum. Australian Museum provider for OZCAM. Record ID: 65c1a1ab-d114-41ef-8374-4096474b407c. Source: http://collections.ala.org.au/public/show/dr340 (source published on 2015-01-07)
Australian Museum. Australian Museum provider for OZCAM. Record ID: 662c6f19-7844-496b-b906-e7a6dbe78fb6. Source: http://collections.ala.org.au/public/show/dr340 (source published on 2015-01-07)
Australian Museum. Australian Museum provider for OZCAM. Record ID: 69b15122-aaf4-400b-8b4d-6a19eeb52aec. Source: http://collections.ala.org.au/public/show/dr340 (source published on 2015-01-07)
Australian Museum. Australian Museum provider for OZCAM. Record ID: 6a4c796b-162d-4366-9dcd-b418a0f1ba99. Source: http://collections.ala.org.au/public/show/dr340 (source published on 2015-01-07)
Australian Museum. Australian Museum provider for OZCAM. Record ID: 6db28254-6da3-40b7-ad63-2b88b3fd067e. Source: http://collections.ala.org.au/public/show/dr340 (source published on 2015-01-07)
Australian Museum. Australian Museum provider for OZCAM. Record ID: 6f425130-bad4-41db-bb17-8455be3ef768. Source: http://collections.ala.org.au/public/show/dr340 (source published on 2015-01-07)
Australian Museum. Australian Museum provider for OZCAM. Record ID: 70d5de4d-6c1e-4e9b-a222-8ff9d4fa3ba7. Source: http://collections.ala.org.au/public/show/dr340 (source published on 2015-01-07)
Australian Museum. Australian Museum provider for OZCAM. Record ID: 71227cc6-813f-4231-8d05-214778f229e3. Source: http://collections.ala.org.au/public/show/dr340 (source published on 2015-01-07)
Australian Museum. Australian Museum provider for OZCAM. Record ID: 742701b5-f2a8-4a74-9e77-e18186d13aab. Source: http://collections.ala.org.au/public/show/dr340 (source published on 2015-01-07)
Australian Museum. Australian Museum provider for OZCAM. Record ID: 7611de03-2cc0-4f4a-a265-9bf3c3ca3e32. Source: http://collections.ala.org.au/public/show/dr340 (source published on 2015-01-07)
Australian Museum. Australian Museum provider for OZCAM. Record ID: 79626687-e755-4a93-8387-f4f55bda3f94. Source: http://collections.ala.org.au/public/show/dr340 (source published on 2015-01-07)
Australian Museum. Australian Museum provider for OZCAM. Record ID: 7c9a6522-d2fc-4ffa-a75a-1a920f6170e2. Source: http://collections.ala.org.au/public/show/dr340 (source published on 2015-01-07)
Australian Museum. Australian Museum provider for OZCAM. Record ID: 819432de-363c-42ea-816f-624f5fd365a6. Source: http://collections.ala.org.au/public/show/dr340 (source published on 2015-01-07)
Australian Museum. Australian Museum provider for OZCAM. Record ID: 84f97f16-2449-41cd-b9a3-85c1a43bae1e. Source: http://collections.ala.org.au/public/show/dr340 (source published on 2015-01-07)
Australian Museum. Australian Museum provider for OZCAM. Record ID: 8650596a-cc00-488f-8db5-3e273145093b. Source: http://collections.ala.org.au/public/show/dr340 (source published on 2015-01-07)
Australian Museum. Australian Museum provider for OZCAM. Record ID: 87fefbec-970d-4d98-be06-d90b0bd7b79f. Source: http://collections.ala.org.au/public/show/dr340 (source published on 2015-01-07)
Australian Museum. Australian Museum provider for OZCAM. Record ID: 89513aa2-c7f3-4040-9b2c-756b93b31da0. Source: http://collections.ala.org.au/public/show/dr340 (source published on 2015-01-07)
Australian Museum. Australian Museum provider for OZCAM. Record ID: 8a6aac96-e9ff-4446-801a-2845759ecfb0. Source: http://collections.ala.org.au/public/show/dr340 (source published on 2015-01-07)
Australian Museum. Australian Museum provider for OZCAM. Record ID: 8ba0bb5e-7621-4c02-b332-f532073c496c. Source: http://collections.ala.org.au/public/show/dr340 (source published on 2015-01-07)
Australian Museum. Australian Museum provider for OZCAM. Record ID: 8c4331f6-2539-4006-8fe4-e3f90b9f42c4. Source: http://collections.ala.org.au/public/show/dr340 (source published on 2015-01-07)
Australian Museum. Australian Museum provider for OZCAM. Record ID: 8d0f6ec8-c57f-4e6f-8d1e-81c7a7bfdf22. Source: http://collections.ala.org.au/public/show/dr340 (source published on 2015-01-07)
Australian Museum. Australian Museum provider for OZCAM. Record ID: 8d242a05-201e-4694-89f8-acc976ecbae7. Source: http://collections.ala.org.au/public/show/dr340 (source published on 2015-01-07)
Australian Museum. Australian Museum provider for OZCAM. Record ID: 8eccc650-b1e4-4da7-a2af-63ec486bc96c. Source: http://collections.ala.org.au/public/show/dr340 (source published on 2015-01-07)
Australian Museum. Australian Museum provider for OZCAM. Record ID: 8f598047-9665-4044-b89b-9af3adfa9450. Source: http://collections.ala.org.au/public/show/dr340 (source published on 2015-01-07)
Australian Museum. Australian Museum provider for OZCAM. Record ID: 908fff1d-96bb-4f5e-948a-868f26109b7e. Source: http://collections.ala.org.au/public/show/dr340 (source published on 2015-01-07)
Australian Museum. Australian Museum provider for OZCAM. Record ID: 913474b5-1829-40d9-8725-8ec1a20b8a68. Source: http://collections.ala.org.au/public/show/dr340 (source published on 2015-01-07)
Australian Museum. Australian Museum provider for OZCAM. Record ID: 920381ef-d7ff-42e4-9d8e-c8aafd490a5b. Source: http://collections.ala.org.au/public/show/dr340 (source published on 2015-01-07)
Australian Museum. Australian Museum provider for OZCAM. Record ID: 932d1ba7-e553-4ed8-bf36-e207f4d51dfc. Source: http://collections.ala.org.au/public/show/dr340 (source published on 2015-01-07)
Australian Museum. Australian Museum provider for OZCAM. Record ID: 933d22d2-8d7d-47eb-bd90-e23d9505d97b. Source: http://collections.ala.org.au/public/show/dr340 (source published on 2015-01-07)
Australian Museum. Australian Museum provider for OZCAM. Record ID: 94642cc9-bf44-466e-9bf2-7c93fb178353. Source: http://collections.ala.org.au/public/show/dr340 (source published on 2015-01-07)
Australian Museum. Australian Museum provider for OZCAM. Record ID: 9509bb61-3f01-42a4-8947-b13c3d98c779. Source: http://collections.ala.org.au/public/show/dr340 (source published on 2015-01-07)
Australian Museum. Australian Museum provider for OZCAM. Record ID: 9561b212-94b8-47b2-8df5-7ac632b057c8. Source: http://collections.ala.org.au/public/show/dr340 (source published on 2015-01-07)
Australian Museum. Australian Museum provider for OZCAM. Record ID: 9bae144e-3164-44b6-9036-4aeba7f88418. Source: http://collections.ala.org.au/public/show/dr340 (source published on 2015-01-07)
Australian Museum. Australian Museum provider for OZCAM. Record ID: 9e82a7f5-086c-4ea4-9de7-b21740ec1dae. Source: http://collections.ala.org.au/public/show/dr340 (source published on 2015-01-07)
Australian Museum. Australian Museum provider for OZCAM. Record ID: 9f57db30-b67d-4e0f-bccc-e50ef7a1001b. Source: http://collections.ala.org.au/public/show/dr340 (source published on 2015-01-07)
Australian Museum. Australian Museum provider for OZCAM. Record ID: a09504fa-7235-4dd0-9f09-6a1a27735ea7. Source: http://collections.ala.org.au/public/show/dr340 (source published on 2015-01-07)
Australian Museum. Australian Museum provider for OZCAM. Record ID: a32dcfde-f97f-4039-8e37-88e7e06d79ce. Source: http://collections.ala.org.au/public/show/dr340 (source published on 2015-01-07)
Australian Museum. Australian Museum provider for OZCAM. Record ID: a3b5c4c5-0d82-47e4-ade1-033d931d5146. Source: http://collections.ala.org.au/public/show/dr340 (source published on 2015-01-07)
Australian Museum. Australian Museum provider for OZCAM. Record ID: a4341cad-ee5e-4679-aa98-20c9943f75c1. Source: http://collections.ala.org.au/public/show/dr340 (source published on 2015-01-07)
Australian Museum. Australian Museum provider for OZCAM. Record ID: a4eee05f-c242-462c-9118-b549125a8557. Source: http://collections.ala.org.au/public/show/dr340 (source published on 2015-01-07)
Australian Museum. Australian Museum provider for OZCAM. Record ID: a68e8e1c-ed5e-4de6-a925-a4b1d463f60d. Source: http://collections.ala.org.au/public/show/dr340 (source published on 2015-01-07)
Australian Museum. Australian Museum provider for OZCAM. Record ID: a7656a98-c2d6-494e-8dca-102a5713065c. Source: http://collections.ala.org.au/public/show/dr340 (source published on 2015-01-07)
Australian Museum. Australian Museum provider for OZCAM. Record ID: a84e3453-01ad-4042-94d0-dd99373a8b32. Source: http://collections.ala.org.au/public/show/dr340 (source published on 2015-01-07)
Australian Museum. Australian Museum provider for OZCAM. Record ID: a95062c6-ec84-4ed9-bae2-857bf1613d3a. Source: http://collections.ala.org.au/public/show/dr340 (source published on 2015-01-07)
Australian Museum. Australian Museum provider for OZCAM. Record ID: aadcb0a0-b9af-4ded-b39c-9350478fe64c. Source: http://collections.ala.org.au/public/show/dr340 (source published on 2015-01-07)
Australian Museum. Australian Museum provider for OZCAM. Record ID: ab874a26-9c64-4385-baf7-8e38dc718255. Source: http://collections.ala.org.au/public/show/dr340 (source published on 2015-01-07)
Australian Museum. Australian Museum provider for OZCAM. Record ID: aee1e896-dca8-4455-922e-debf9781caca. Source: http://collections.ala.org.au/public/show/dr340 (source published on 2015-01-07)
Australian Museum. Australian Museum provider for OZCAM. Record ID: b3666921-3073-411a-be12-e6b02e7fe7f1. Source: http://collections.ala.org.au/public/show/dr340 (source published on 2015-01-07)
Australian Museum. Australian Museum provider for OZCAM. Record ID: b45e24d5-d3cd-4c13-b9c5-22236df2a047. Source: http://collections.ala.org.au/public/show/dr340 (source published on 2015-01-07)
Australian Museum. Australian Museum provider for OZCAM. Record ID: b5740f75-3d35-4ea3-87e3-ae85b3d03ecd. Source: http://collections.ala.org.au/public/show/dr340 (source published on 2015-01-07)
Australian Museum. Australian Museum provider for OZCAM. Record ID: b5a3dde9-c176-47d3-9d22-4f1fb9b158e6. Source: http://collections.ala.org.au/public/show/dr340 (source published on 2015-01-07)
Australian Museum. Australian Museum provider for OZCAM. Record ID: b9281cb0-b60f-4931-97c3-a95076cce1ad. Source: http://collections.ala.org.au/public/show/dr340 (source published on 2015-01-07)
Australian Museum. Australian Museum provider for OZCAM. Record ID: b9815955-6135-4f24-94e0-e023473ad1d5. Source: http://collections.ala.org.au/public/show/dr340 (source published on 2015-01-07)
Australian Museum. Australian Museum provider for OZCAM. Record ID: bebf07e3-e258-4c45-a1e6-ede5b5f24596. Source: http://collections.ala.org.au/public/show/dr340 (source published on 2015-01-07)
Australian Museum. Australian Museum provider for OZCAM. Record ID: c0202ae3-a351-4b72-9114-b915ae432b44. Source: http://collections.ala.org.au/public/show/dr340 (source published on 2015-01-07)
Australian Museum. Australian Museum provider for OZCAM. Record ID: c09895ef-9e05-4e94-9ff3-bcc0ec694a21. Source: http://collections.ala.org.au/public/show/dr340 (source published on 2015-01-07)
Australian Museum. Australian Museum provider for OZCAM. Record ID: c30a2f4f-0802-414c-96b8-332771ad4f97. Source: http://collections.ala.org.au/public/show/dr340 (source published on 2015-01-07)
Australian Museum. Australian Museum provider for OZCAM. Record ID: c36e9349-5b7b-432d-897a-67dd9c3379cc. Source: http://collections.ala.org.au/public/show/dr340 (source published on 2015-01-07)
Australian Museum. Australian Museum provider for OZCAM. Record ID: c5bc6c30-5f40-4270-9ae2-60b445f657f1. Source: http://collections.ala.org.au/public/show/dr340 (source published on 2015-01-07)
Australian Museum. Australian Museum provider for OZCAM. Record ID: c717a615-a814-489a-ad23-4bc08b77a7bd. Source: http://collections.ala.org.au/public/show/dr340 (source published on 2015-01-07)
Australian Museum. Australian Museum provider for OZCAM. Record ID: c7e7db4e-f825-499d-8475-5a1404c26adf. Source: http://collections.ala.org.au/public/show/dr340 (source published on 2015-01-07)
Australian Museum. Australian Museum provider for OZCAM. Record ID: c8ef22f4-58c8-46ee-be93-038c5a72eb54. Source: http://collections.ala.org.au/public/show/dr340 (source published on 2015-01-07)
Australian Museum. Australian Museum provider for OZCAM. Record ID: cbfa5c21-eadb-40e3-a119-28d07f4380f8. Source: http://collections.ala.org.au/public/show/dr340 (source published on 2015-01-07)
Australian Museum. Australian Museum provider for OZCAM. Record ID: cc0de7b7-65a5-47ac-b88f-1dac57fa95b7. Source: http://collections.ala.org.au/public/show/dr340 (source published on 2015-01-07)
Australian Museum. Australian Museum provider for OZCAM. Record ID: cc60b20e-84ed-46bf-aab2-8d2f2dd5b415. Source: http://collections.ala.org.au/public/show/dr340 (source published on 2015-01-07)
Australian Museum. Australian Museum provider for OZCAM. Record ID: ccd6e7ad-9e27-4bb8-9c9d-d915841886fd. Source: http://collections.ala.org.au/public/show/dr340 (source published on 2015-01-07)
Australian Museum. Australian Museum provider for OZCAM. Record ID: cd36ec32-1a63-4bdb-90ed-d5b3c9778774. Source: http://collections.ala.org.au/public/show/dr340 (source published on 2015-01-07)
Australian Museum. Australian Museum provider for OZCAM. Record ID: cd743c93-d463-4abe-b472-c47cb0728e5d. Source: http://collections.ala.org.au/public/show/dr340 (source published on 2015-01-07)
Australian Museum. Australian Museum provider for OZCAM. Record ID: cd79c4a1-8074-494b-9029-84d7860c003b. Source: http://collections.ala.org.au/public/show/dr340 (source published on 2015-01-07)
Australian Museum. Australian Museum provider for OZCAM. Record ID: cf20d3bb-a91d-492a-bbe9-9cd6ba492c6b. Source: http://collections.ala.org.au/public/show/dr340 (source published on 2015-01-07)
Australian Museum. Australian Museum provider for OZCAM. Record ID: cf27488a-fc9c-47d3-b4bf-75dd25367fd9. Source: http://collections.ala.org.au/public/show/dr340 (source published on 2015-01-07)
Australian Museum. Australian Museum provider for OZCAM. Record ID: d0986b91-eaef-4d13-895e-45d9c6e2777b. Source: http://collections.ala.org.au/public/show/dr340 (source published on 2015-01-07)
Australian Museum. Australian Museum provider for OZCAM. Record ID: d09f0ce8-89a0-4119-8fc4-e6d6afcd6237. Source: http://collections.ala.org.au/public/show/dr340 (source published on 2015-01-07)
Australian Museum. Australian Museum provider for OZCAM. Record ID: d4dd5bf7-7435-4161-9246-7e0014dfcf9d. Source: http://collections.ala.org.au/public/show/dr340 (source published on 2015-01-07)
Australian Museum. Australian Museum provider for OZCAM. Record ID: d58c35fe-a223-40ea-b76f-e6f70f691bfa. Source: http://collections.ala.org.au/public/show/dr340 (source published on 2015-01-07)
Australian Museum. Australian Museum provider for OZCAM. Record ID: d7c52358-288d-45fe-8b02-2337892f6165. Source: http://collections.ala.org.au/public/show/dr340 (source published on 2015-01-07)
Australian Museum. Australian Museum provider for OZCAM. Record ID: d7d9b098-5eb3-4361-97cc-971cead91e79. Source: http://collections.ala.org.au/public/show/dr340 (source published on 2015-01-07)
Australian Museum. Australian Museum provider for OZCAM. Record ID: d8c81899-629d-418a-8785-198d9a37633d. Source: http://collections.ala.org.au/public/show/dr340 (source published on 2015-01-07)
Australian Museum. Australian Museum provider for OZCAM. Record ID: d9b69fb7-1fcb-4f86-90a3-c94844cf3911. Source: http://collections.ala.org.au/public/show/dr340 (source published on 2015-01-07)
Australian Museum. Australian Museum provider for OZCAM. Record ID: d9c608fa-aa1c-4a47-8744-7e53fa5f2f50. Source: http://collections.ala.org.au/public/show/dr340 (source published on 2015-01-07)
Australian Museum. Australian Museum provider for OZCAM. Record ID: d9cdaf54-4cd0-45a9-a834-e85d97414b6a. Source: http://collections.ala.org.au/public/show/dr340 (source published on 2015-01-07)
Australian Museum. Australian Museum provider for OZCAM. Record ID: da5caa59-c370-40e3-b8d0-a3984c8608d8. Source: http://collections.ala.org.au/public/show/dr340 (source published on 2015-01-07)
Australian Museum. Australian Museum provider for OZCAM. Record ID: db7ccb72-52a0-4b56-89b8-f1a859d79834. Source: http://collections.ala.org.au/public/show/dr340 (source published on 2015-01-07)
Australian Museum. Australian Museum provider for OZCAM. Record ID: e07407f5-4d59-4b30-86ea-8f18f466f29a. Source: http://collections.ala.org.au/public/show/dr340 (source published on 2015-01-07)
Australian Museum. Australian Museum provider for OZCAM. Record ID: e2117860-0d65-4e86-aaff-a17c15d2a7ea. Source: http://collections.ala.org.au/public/show/dr340 (source published on 2015-01-07)
Australian Museum. Australian Museum provider for OZCAM. Record ID: e28c574c-6a37-49a0-bd20-e589d3b5a153. Source: http://collections.ala.org.au/public/show/dr340 (source published on 2015-01-07)
Australian Museum. Australian Museum provider for OZCAM. Record ID: e5b0ba15-5f7e-4bb1-8767-9e43b9eafd66. Source: http://collections.ala.org.au/public/show/dr340 (source published on 2015-01-07)
Australian Museum. Australian Museum provider for OZCAM. Record ID: e669a932-392c-4660-806b-bd55615fcc73. Source: http://collections.ala.org.au/public/show/dr340 (source published on 2015-01-07)
Australian Museum. Australian Museum provider for OZCAM. Record ID: e82d45cb-777c-4939-8592-0d15300eecc9. Source: http://collections.ala.org.au/public/show/dr340 (source published on 2015-01-07)
Australian Museum. Australian Museum provider for OZCAM. Record ID: e8aab7ee-a667-4050-b01e-973132ae8261. Source: http://collections.ala.org.au/public/show/dr340 (source published on 2015-01-07)
Australian Museum. Australian Museum provider for OZCAM. Record ID: e9613574-7dd2-4c1e-8d55-362140997094. Source: http://collections.ala.org.au/public/show/dr340 (source published on 2015-01-07)
Australian Museum. Australian Museum provider for OZCAM. Record ID: ec36e6a2-3090-4e1d-9443-218b3a5d5940. Source: http://collections.ala.org.au/public/show/dr340 (source published on 2015-01-07)
Australian Museum. Australian Museum provider for OZCAM. Record ID: eca9471d-cab7-42a0-99ad-97d1cc217931. Source: http://collections.ala.org.au/public/show/dr340 (source published on 2015-01-07)
Australian Museum. Australian Museum provider for OZCAM. Record ID: f0379797-f178-4f82-96c2-c210b30c812d. Source: http://collections.ala.org.au/public/show/dr340 (source published on 2015-01-07)
Australian Museum. Australian Museum provider for OZCAM. Record ID: f067fc4c-f149-47d1-9918-14e44f6ada25. Source: http://collections.ala.org.au/public/show/dr340 (source published on 2015-01-07)
Australian Museum. Australian Museum provider for OZCAM. Record ID: f17d854d-2ef0-454b-9998-ed2e1dbf2667. Source: http://collections.ala.org.au/public/show/dr340 (source published on 2015-01-07)
Australian Museum. Australian Museum provider for OZCAM. Record ID: f1af67d7-68fb-47c7-ac02-ffa7ee82630b. Source: http://collections.ala.org.au/public/show/dr340 (source published on 2015-01-07)
Australian Museum. Australian Museum provider for OZCAM. Record ID: f1c87467-0efe-4388-b2cd-dd79900e1906. Source: http://collections.ala.org.au/public/show/dr340 (source published on 2015-01-07)
Australian Museum. Australian Museum provider for OZCAM. Record ID: f456ddde-718f-410a-a209-6e2948784011. Source: http://collections.ala.org.au/public/show/dr340 (source published on 2015-01-07)
Australian Museum. Australian Museum provider for OZCAM. Record ID: f6bf9ac4-9a1d-4f74-920b-1f066691c06e. Source: http://collections.ala.org.au/public/show/dr340 (source published on 2015-01-07)
Australian Museum. Australian Museum provider for OZCAM. Record ID: f8cff433-2119-467d-8a9c-bd35353a59b3. Source: http://collections.ala.org.au/public/show/dr340 (source published on 2015-01-07)
Australian Museum. Australian Museum provider for OZCAM. Record ID: f99b0033-9bfa-4973-bc5e-1b3e824f8efb. Source: http://collections.ala.org.au/public/show/dr340 (source published on 2015-01-07)
Australian Museum. Australian Museum provider for OZCAM. Record ID: fa261c2b-574f-421f-aa9b-aee773b757a1. Source: http://collections.ala.org.au/public/show/dr340 (source published on 2015-01-07)
Australian Museum. Australian Museum provider for OZCAM. Record ID: fa4833d4-78d2-4ff6-819b-b6ca89fcfdf7. Source: http://collections.ala.org.au/public/show/dr340 (source published on 2015-01-07)
Australian Museum. Australian Museum provider for OZCAM. Record ID: fa7adb8a-e4df-48b9-b05c-a5c209ef377b. Source: http://collections.ala.org.au/public/show/dr340 (source published on 2015-01-07)
Australian Museum. Australian Museum provider for OZCAM. Record ID: fbedbf12-de1f-48af-8d55-af91e459817e. Source: http://collections.ala.org.au/public/show/dr340 (source published on 2015-01-07)
Australian Museum. Australian Museum provider for OZCAM. Record ID: fc8a3a65-dd98-4ed4-b134-4c4436fe7d94. Source: http://collections.ala.org.au/public/show/dr340 (source published on 2015-01-07)
Australian Museum. Australian Museum provider for OZCAM. Record ID: fe4cae86-d165-420d-94f3-368cf1307491. Source: http://collections.ala.org.au/public/show/dr340 (source published on 2015-01-07)
Australian Museum. Australian Museum provider for OZCAM. Record ID: ffda0438-0b8a-4cc5-8141-cfc232792bb6. Source: http://collections.ala.org.au/public/show/dr340 (source published on 2015-01-07)
Australian Museum. Australian Museum provider for OZCAM. Record ID: fff413b3-8fe4-48e9-ba92-58e0ce798264. Source: http://collections.ala.org.au/public/show/dr340 (source published on 2015-01-07)
Australian Museum. Australian Museum provider for OZCAM. Record ID: 001bc0b2-c044-4e57-8e0f-8b1ba21dc6b7. Source: http://collections.ala.org.au/public/show/dr340 (source published on 2015-01-07)
Australian Museum. Australian Museum provider for OZCAM. Record ID: 0291cc04-34ff-414b-b467-342edbea5f64. Source: http://collections.ala.org.au/public/show/dr340 (source published on 2015-01-07)
Australian Museum. Australian Museum provider for OZCAM. Record ID: 0402f243-708d-4d75-a736-0932007b0439. Source: http://collections.ala.org.au/public/show/dr340 (source published on 2015-01-07)
Australian Museum. Australian Museum provider for OZCAM. Record ID: 0435ab21-b102-4a2e-92bc-07e6264404f1. Source: http://collections.ala.org.au/public/show/dr340 (source published on 2015-01-07)
Australian Museum. Australian Museum provider for OZCAM. Record ID: 07d00065-10b5-47a6-a677-790ea1aac568. Source: http://collections.ala.org.au/public/show/dr340 (source published on 2015-01-07)
Australian Museum. Australian Museum provider for OZCAM. Record ID: 09b086da-3cb1-4d8d-96bb-60d8ea8e042d. Source: http://collections.ala.org.au/public/show/dr340 (source published on 2015-01-07)
Australian Museum. Australian Museum provider for OZCAM. Record ID: 0ad98d48-835f-455e-9cc6-0d56d7fd88ff. Source: http://collections.ala.org.au/public/show/dr340 (source published on 2015-01-07)
Australian Museum. Australian Museum provider for OZCAM. Record ID: 0b19b5dd-4f16-49b6-b5dd-946376940dee. Source: http://collections.ala.org.au/public/show/dr340 (source published on 2015-01-07)
Australian Museum. Australian Museum provider for OZCAM. Record ID: 0d0f701b-0ff4-4ce4-9d62-0963cc196bde. Source: http://collections.ala.org.au/public/show/dr340 (source published on 2015-01-07)
Australian Museum. Australian Museum provider for OZCAM. Record ID: 0d1ecc2b-a888-4e88-8a7b-9a3cee5c1722. Source: http://collections.ala.org.au/public/show/dr340 (source published on 2015-01-07)
Australian Museum. Australian Museum provider for OZCAM. Record ID: 0d885a26-4913-45d3-ad18-98b11baa4e30. Source: http://collections.ala.org.au/public/show/dr340 (source published on 2015-01-07)
Australian Museum. Australian Museum provider for OZCAM. Record ID: 0de90332-957c-43c5-8fd6-8297113146a4. Source: http://collections.ala.org.au/public/show/dr340 (source published on 2015-01-07)
Australian Museum. Australian Museum provider for OZCAM. Record ID: 0e85db74-d32f-4d75-90e3-050272db7b98. Source: http://collections.ala.org.au/public/show/dr340 (source published on 2015-01-07)
Australian Museum. Australian Museum provider for OZCAM. Record ID: 0ece40fc-eb69-4eef-904f-4894773b0b6f. Source: http://collections.ala.org.au/public/show/dr340 (source published on 2015-01-07)
Australian Museum. Australian Museum provider for OZCAM. Record ID: 0fdeaa9c-7654-4abb-b45f-9d15641480c6. Source: http://collections.ala.org.au/public/show/dr340 (source published on 2015-01-07)
Australian Museum. Australian Museum provider for OZCAM. Record ID: 10233627-31bd-490c-9a68-d87ebcc31db1. Source: http://collections.ala.org.au/public/show/dr340 (source published on 2015-01-07)
Australian Museum. Australian Museum provider for OZCAM. Record ID: 166bcb84-782a-47e0-b121-163d5bb8f3e4. Source: http://collections.ala.org.au/public/show/dr340 (source published on 2015-01-07)
Australian Museum. Australian Museum provider for OZCAM. Record ID: 17908d51-e28c-4319-8987-9beab45203c8. Source: http://collections.ala.org.au/public/show/dr340 (source published on 2015-01-07)
Australian Museum. Australian Museum provider for OZCAM. Record ID: 1814d52f-bc44-47bd-9502-9bbb817d780a. Source: http://collections.ala.org.au/public/show/dr340 (source published on 2015-01-07)
Australian Museum. Australian Museum provider for OZCAM. Record ID: 18619e0e-d0af-488e-8c67-f16a6cc541aa. Source: http://collections.ala.org.au/public/show/dr340 (source published on 2015-01-07)
Australian Museum. Australian Museum provider for OZCAM. Record ID: 19943be8-d64a-44b4-ba4b-82e85153b1fe. Source: http://collections.ala.org.au/public/show/dr340 (source published on 2015-01-07)
Australian Museum. Australian Museum provider for OZCAM. Record ID: 19ef030a-b945-40e5-83ce-a5bc2859bd9c. Source: http://collections.ala.org.au/public/show/dr340 (source published on 2015-01-07)
Australian Museum. Australian Museum provider for OZCAM. Record ID: 19ef6504-4845-4024-85bc-3cbf39ae3c3b. Source: http://collections.ala.org.au/public/show/dr340 (source published on 2015-01-07)
Australian Museum. Australian Museum provider for OZCAM. Record ID: 1a1bf2f2-dcb1-4929-98f0-46f70149bf51. Source: http://collections.ala.org.au/public/show/dr340 (source published on 2015-01-07)
Australian Museum. Australian Museum provider for OZCAM. Record ID: 1c8ecf9f-e284-4577-a851-7eaa35ec3e88. Source: http://collections.ala.org.au/public/show/dr340 (source published on 2015-01-07)
Australian Museum. Australian Museum provider for OZCAM. Record ID: 1d96b5eb-2c2b-438e-b4c4-f4972feec097. Source: http://collections.ala.org.au/public/show/dr340 (source published on 2015-01-07)
Australian Museum. Australian Museum provider for OZCAM. Record ID: 1e4a9335-168c-4cd7-911c-01f5e8d12151. Source: http://collections.ala.org.au/public/show/dr340 (source published on 2015-01-07)
Australian Museum. Australian Museum provider for OZCAM. Record ID: 1e4e9216-5208-48f2-9fb9-2ecd62e07d0c. Source: http://collections.ala.org.au/public/show/dr340 (source published on 2015-01-07)
Australian Museum. Australian Museum provider for OZCAM. Record ID: 20ada5cc-b553-4a9e-9143-77a94ad9145a. Source: http://collections.ala.org.au/public/show/dr340 (source published on 2015-01-07)
Australian Museum. Australian Museum provider for OZCAM. Record ID: 21dd6479-7100-4c0d-b1b3-a44cccaf2cbf. Source: http://collections.ala.org.au/public/show/dr340 (source published on 2015-01-07)
Australian Museum. Australian Museum provider for OZCAM. Record ID: 21e4c3dc-bc53-4adb-a444-9f59500c7259. Source: http://collections.ala.org.au/public/show/dr340 (source published on 2015-01-07)
Australian Museum. Australian Museum provider for OZCAM. Record ID: 221876b8-461b-4fce-bebe-4dfff631467d. Source: http://collections.ala.org.au/public/show/dr340 (source published on 2015-01-07)
Australian Museum. Australian Museum provider for OZCAM. Record ID: 227d300f-09af-4485-b001-89d91c992edc. Source: http://collections.ala.org.au/public/show/dr340 (source published on 2015-01-07)
Australian Museum. Australian Museum provider for OZCAM. Record ID: 23c70387-ea00-4ee2-9586-e1c98b20e3c2. Source: http://collections.ala.org.au/public/show/dr340 (source published on 2015-01-07)
Australian Museum. Australian Museum provider for OZCAM. Record ID: 24fbd6e3-421c-4e2b-824a-4d69753bded6. Source: http://collections.ala.org.au/public/show/dr340 (source published on 2015-01-07)
Australian Museum. Australian Museum provider for OZCAM. Record ID: 252edd50-7eb4-425d-bf28-14888d7df31b. Source: http://collections.ala.org.au/public/show/dr340 (source published on 2015-01-07)
Australian Museum. Australian Museum provider for OZCAM. Record ID: 2676bbad-ee4d-4072-bbfc-e3ba6c9f26d0. Source: http://collections.ala.org.au/public/show/dr340 (source published on 2015-01-07)
Australian Museum. Australian Museum provider for OZCAM. Record ID: 269a3a4e-e41d-4873-bd39-a4a5e0581a5e. Source: http://collections.ala.org.au/public/show/dr340 (source published on 2015-01-07)
[truncated: 110,844 more rows]
